# Supplementary material
Source: Royal Society of Chemistry journal article supplement (doi:10.1039/d6ob00837b)

## Supporting Information

### Stereodivergent Access to 5–6–5, 5–6–6, and 5–6–7 Fused Tricyclic Indolizidine Cores via Ring-Size-Dependent Fragmentation of Overbred Intermediates

Sushil Kumar Ranjan,<sup>a</sup> Kishor Chandra Bharadwaj\*<sup>a</sup> and Ganesh Pandey\*<sup>a</sup>

<sup>a</sup>Department of Chemistry, Institute of Science, Banaras Hindu University, Varanasi, 221005, India.

Email: [ganesh.pandey1@bhu.ac.in](mailto:ganesh.pandey1@bhu.ac.in)

| S. No. | Table                                                                      | Page    |
|--------|----------------------------------------------------------------------------|---------|
| 1      | General Information                                                        | S2      |
| 2      | General procedure for synthesis of compound 16 to 28                       | S2-S4   |
| 3      | Synthesis and Characterization of compounds 16 to 29                       | S4-S10  |
| 4      | X-Ray Crystallography of compounds 19, 20, 21, 23, 25, 26 and 29           | S11-S24 |
| 5      | References                                                                 | S25     |
| 6      | <sup>1</sup> H, <sup>13</sup> C and 2D NMR spectra of synthesized compound | S26-S65 |

**1. General Information:** All reactions were performed in oven-dried or flame-dried round-bottom flasks fitted with rubber septa and were conducted under positive argon pressure using standard Schlenk techniques, unless noted otherwise. Cannula or gas-tight syringes with stainless steel needles were used to transfer air or moisture-sensitive liquids. Where necessary (so noted), solutions were degassed by sparging with argon for a minimum of 10 min. Commercial reagents and solvents were purified and stored according to procedures prescribed in the literature<sup>1</sup>. All commercial reagents were obtained from Merck, TCI and Spectrochem. Reaction progress was monitored by TLC on aluminium-backed silica gel 60 F<sub>254</sub> plates (Merck), visualized by UV light (254 nm) and/or staining with iodine or phosphomolybdic acid. Column chromatography was performed on silica gel (100–200 mesh) using n-hexane/ethyl acetate mixtures. NMR (Nuclear Magnetic Resonance) spectra were recorded on Bruker 500 MHz spectrometers (500 MHz for <sup>1</sup>H and 126 MHz for <sup>13</sup>C respectively), Bruker 600 MHz spectrometers (600 MHz for <sup>1</sup>H and 151 MHz for <sup>13</sup>C respectively), and JEOL ECS 500 MHz spectrometers (500 MHz for <sup>1</sup>H and 126 MHz for <sup>13</sup>C respectively) using deuterated solvent. Chemical shifts are reported in ppm, proton coupling constants (J) are reported as absolute values in Hz, and multiplicity (s = singlet, d = doublet, t = triplet, q = quartet, br = broad, m = multiplet or combinations thereof). NMR spectra data are described in terms of chemical shift ( $\delta$  in ppm) relative to TMS ( $\delta$  = 0.00 ppm) or CDCl<sub>3</sub> ( $\delta$  = 7.26 ppm) for <sup>1</sup>H NMR and the central line of CDCl<sub>3</sub> ( $\delta$  = 77.16 ppm) for <sup>13</sup>C NMR. HRMS (High-Resolution Mass Spectrometry) was performed on SCIEX X500R QTOF (TOF-MS) mass spectrometer. Single crystal X-ray diffraction measurements were carried out on Rigaku: XTALAB Synergy-I.

## **2. General Procedure for synthesis of compounds 16 to 28**

### **General Procedure A<sup>2</sup>**

To an oven-dried 50 mL two-neck round-bottom flask equipped with a magnetic stir bar, Palladium(II) acetate (10 mol%) and the allylic acetate (1.5 equiv.) were added. The flask was evacuated and backfilled with argon (3 cycles). Anhydrous THF (3.5 ml mmol<sup>-1</sup>) was added *via* syringe, and the mixture was degassed with an argon balloon for 15 minutes. Subsequently, Tributylphosphine (PBU<sub>3</sub>, 50% solution in ethyl acetate, 40 mol%) was added dropwise. The resulting mixture was stirred for 5 minutes at room temperature. A solution of the bicyclic ketone (1 equiv.) in anhydrous THF (3.5 mL mmol<sup>-1</sup>) was then added to the reaction mixture dropwise (resulting in a final reaction concentration of approx. 0.14 M). The reaction was stirred at room

temperature under an argon atmosphere for 10 hours. Upon completion (monitored by TLC), the solvent was removed under reduced pressure. The crude residue was purified by column chromatography on silica gel using a mixture of ethyl acetate and hexane to afford the desired product.

### **General Procedure B**

To a stirred solution of the appropriate starting material (1.0 equiv) in DCM (10 mL mmol<sup>-1</sup>) was added trifluoroacetic acid (TFA) (5.0 equiv) at 25 °C. The reaction mixture (approx. 0.1 M) was stirred for 5 h. After the reaction time, the volatiles were removed under reduced pressure. The resulting residue was dissolved in ethyl acetate and washed with saturated aqueous NaHCO<sub>3</sub> solution and water (2 ×). The aqueous layer was further extracted with EtOAc (2 ×). The combined organic layers were washed with brine, dried over anhydrous Na<sub>2</sub>SO<sub>4</sub>, filtered, and concentrated under reduced pressure. The crude residue was purified by column chromatography on silica gel using a mixture of ethyl acetate and hexane to afford the desired product and recovered starting material. The recovered starting material was subjected again to the identical reaction conditions (25 °C, 5.0 equiv TFA). This cycle was repeated two more times (total three cycles). The yields reported correspond to the combined yield of the isolated product from these cycles.

### **General Procedure C**

To a stirred solution of the appropriate starting material (1.0 equiv) in DCM (10 mL mmol<sup>-1</sup>) was added trifluoroacetic acid (TFA) (5.0 equiv) at 25 °C. The reaction mixture (approx. 0.1M) was stirred at this temperature for 24 h. After completion of the reaction (monitored by TLC), the volatiles were removed under reduced pressure. The resulting residue was dissolved in ethyl acetate (EtOAc) and washed with saturated aqueous NaHCO<sub>3</sub> solution. The aqueous layer was further extracted with EtOAc (2 ×). The combined organic layers were washed with brine, dried over anhydrous Na<sub>2</sub>SO<sub>4</sub>, filtered, and concentrated under reduced pressure. The crude residue was purified by column chromatography on silica gel using a mixture of ethyl acetate and hexane to afford the desired product.

### **General Procedure D<sup>3</sup>**

To a stirred solution of the appropriate starting material (1.0 equiv) in dry methanol (7.2 mL mmol<sup>-1</sup>) was added sodium methoxide (NaOMe) (0.5 equiv) at room temperature under an argon atmosphere (Note: In the case of substrate **17**, gentle warming (approx. 55 to 60 °C) was required to achieve a clear solution prior to the addition of NaOMe). The reaction mixture (approx.

0.14 M) was stirred at room temperature for 30 minutes. After completion of the reaction (monitored by TLC), the solvent was removed under reduced pressure. The resulting residue was dissolved in ethyl acetate (EtOAc) and washed with water (2 ×). The aqueous layer was further extracted with EtOAc (2 ×). The combined organic layers were washed with brine, dried over anhydrous Na<sub>2</sub>SO<sub>4</sub>, filtered, and concentrated under reduced pressure. The crude residue was purified by column chromatography on silica gel using a mixture of ethyl acetate and hexane, to afford the desired product.

### 3. Characterization of compounds 16 to 29

#### Synthesis of (1*R*,2*S*,4*S*)-*tert*-butyl 3-oxo-2-((5-oxocyclopent-1-en-1-yl)methyl)-2-(phenylsulfonyl)-7 azabicyclo[2.2.1]heptane-7-carboxylate (16)

Prepared according to General Procedure A using bicyclic ketone **12** (300 mg, 0.854 mmol) and allyl acetate **13** (197.5 mg, 1.282 mmol). Purification by column chromatography (silica gel 100-200mesh, 20% EtOAc in hexanes) afforded **16** as a white solid (350 mg, 92% yield).  $R_f = 0.25$  (30% ethyl acetate in hexane), mp = 158-160 °C,  $[\alpha]_D^{25} = +65.6$  (*c* 2.8, CHCl<sub>3</sub>) ; <sup>1</sup>H NMR (500 MHz, CDCl<sub>3</sub>): δ (ppm) 8.02 (d, *J* = 7.8 Hz, 2H), 7.66 (t, *J* = 7.4 Hz, 1H), 7.56 (t, *J* = 7.7 Hz, 2H), 7.31 – 7.18 (m, 1H), 4.61 (d, *J* = 4.3 Hz, 1H), 4.33 (br s, 1H), 2.86 – 2.78 (m, 1H), 2.67 (d, *J* = 14.5 Hz, 1H), 2.54 – 2.42 (m, 2H), 2.39 (d, *J* = 14.6 Hz, 1H), 2.25 – 2.21 (m, 2H), 2.17 – 2.04 (m, 2H), 1.89 (br s, 1H), 1.41 (s, 9H). <sup>13</sup>C{<sup>1</sup>H} NMR (126 MHz, CDCl<sub>3</sub>): δ (ppm) 208.1, 199.9, 160.3, 153.9, 139.4, 137.6, 134.5, 130.5, 129.1, 81.5, 78.4, 64.9, 62.4, 33.8, 29.5, 28.2, 27.0, 26.0, 25.8. HRMS (ESI-TOF) *m/z*: [M + Na]<sup>+</sup> calcd. for C<sub>23</sub>H<sub>27</sub>NO<sub>6</sub>SNa 468.1451; Found 468.1455.

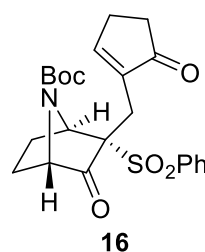

#### Synthesis of (1*R*,2*S*,4*S*)-*tert*-butyl 3-oxo-2-((6-oxocyclohex-1-en-1-yl)methyl)-2-(phenylsulfonyl)-7-azabicyclo[2.2.1]heptane-7-carboxylate (17)

Prepared according to General Procedure A using bicyclic ketone **12** (500 mg, 1.424 mmol) and allyl acetate **14** (359 mg, 2.136 mmol). Purification by column chromatography (silica gel 100-200mesh, 20% EtOAc in hexanes) afforded **17** as a white solid (621 mg, 95% yield).  $R_f = 0.3$  (30% ethyl acetate in hexane), mp = 134-136 °C,  $[\alpha]_D^{25} = +54.7$  (*c* 2.0, CHCl<sub>3</sub>) ; <sup>1</sup>H NMR (500 MHz, CDCl<sub>3</sub>): δ (ppm) 8.06 (d, *J* = 7.9 Hz, 2H), 7.66 (t, *J* = 7.3 Hz, 1H), 7.57 (t, *J* = 7.6 Hz, 2H), 6.77 – 6.34 (m, 1H), 4.54 (d, *J* = 3.1 Hz, 1H), 4.25 (br s, 1H), 2.86 – 2.52 (m, 2H), 2.36 – 2.17 (m, 5H), 2.09 (br s, 2H), 1.93 – 1.79 (m, 3H), 1.43 (s, 9H). <sup>13</sup>C{<sup>1</sup>H} NMR (126 MHz, CDCl<sub>3</sub>): δ (ppm) 208.1, 199.9, 160.3, 153.9, 139.4, 137.6, 134.5, 130.5, 129.1, 81.5, 78.4, 64.9, 62.4, 33.8, 29.5, 28.2, 27.0, 26.0, 25.8.

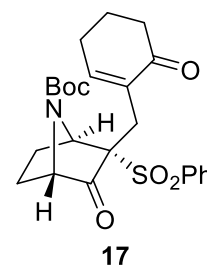

NMR (126 MHz, CDCl<sub>3</sub>):  $\delta$  (ppm) 200.1, 198.4, 154.6, 148.9, 137.8, 134.3, 133.9, 130.6, 129.1, 81.5, 78.6, 65.4, 62.5, 38.0, 35.3, 28.3, 26.4, 26.3, 26.2, 22.6. HRMS (ESI-TOF) m/z: [M + Na]<sup>+</sup> calcd. For C<sub>24</sub>H<sub>29</sub>NO<sub>6</sub>SNa 482.1608; Found 482.1599.

### Synthesis of (1*R*,2*S*,4*S*)-*tert*-butyl 3-oxo-2-((7-oxocyclohept-1-en-1-yl)methyl)-2-(phenylsulfonyl)-7-azabicyclo[2.2.1]heptane-7-carboxylate (**18**)

Prepared according to General Procedure A using bicyclic ketone **12** (300 mg, 0.854 mmol) and allyl acetate **15** (233.4 mg, 1.282 mmol). Purification by column chromatography (silica gel 100-200mesh, 20% EtOAc in hexanes) afforded **18** as a white semi solid (352 mg, 87% yield). R<sub>f</sub> = 0.33 (30% ethyl acetate in hexane), mp = 96-104 °C, [ $\alpha$ ]<sub>D</sub><sup>25</sup> = +28.0 (*c* 0.4, CHCl<sub>3</sub>); <sup>1</sup>H NMR (600 MHz, CDCl<sub>3</sub>):  $\delta$  (ppm) 8.06 (d, *J* = 7.9 Hz, 2H), 7.66 (t, *J* = 7.3 Hz, 1H), 7.57 (t, *J* = 7.7 Hz, 2H), 6.46 – 6.17 (m, 1H), 4.52 (d, *J* = 3.8 Hz, 1H), 4.25 (br s, 1H), 2.88 – 2.64 (m, 2H), 2.50 – 2.40 (m, 3H), 2.34 – 2.21 (m, 2H), 2.08 (br s, 1H), 1.89 (br s, 1H), 1.70 – 1.60 (m, 4H), 1.55 (d, *J* = 5.3 Hz, 1H), 1.43 (s, 9H). <sup>13</sup>C{<sup>1</sup>H} NMR (151 MHz, CDCl<sub>3</sub>):  $\delta$  (ppm) 202.8, 200.3, 154.7, 147.0, 145.9, 137.8, 134.3, 130.6, 129.1, 81.6, 78.8, 65.6, 62.6, 42.0, 38.5, 28.3, 28.1, 26.4, 25.6, 25.2, 21.4. HRMS (ESI-TOF) m/z: [M + Na]<sup>+</sup> calcd. For C<sub>25</sub>H<sub>31</sub>NO<sub>6</sub>SNa 496.1764; Found 496.1758.

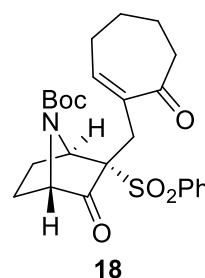

### Synthesis of (1*S*,3*aR*,4*S*,5*aR*,8*aR*)-4-(phenylsulfonyl)decahydro-6*H*-1,4-methanocyclopenta[*e*]indolizine-6,10-dione (**19**)

Prepared according to General Procedure C using **16** (200 mg, 0.449 mmol). Purification by column chromatography (silica gel 100-200mesh, 70% EtOAc in hexanes) afforded **19** as a white solid (144.2 mg, 93% yield). R<sub>f</sub> = 0.2 (60% ethyl acetate in hexane), mp = 150-152 °C, [ $\alpha$ ]<sub>D</sub><sup>25</sup> = +138.1 (*c* 2.2, CHCl<sub>3</sub>); <sup>1</sup>H NMR (500 MHz, CDCl<sub>3</sub>):  $\delta$  (ppm) 7.95 (d, *J* = 7.8 Hz, 2H), 7.67 (t, *J* = 7.4 Hz, 1H), 7.57 (t, *J* = 7.8 Hz, 2H), 3.85 (d, *J* = 4.1 Hz, 1H), 3.63 – 3.57 (m, 2H), 2.80 – 2.73 (m, 1H), 2.45 – 2.37 (m, 1H), 2.29 – 2.17 (m, 3H), 2.15 – 2.05 (m, 2H), 2.02 – 1.97 (m, 1H), 1.95 – 1.88 (m, 1H), 1.87 – 1.77 (m, 1H). <sup>13</sup>C{<sup>1</sup>H} NMR (126 MHz, CDCl<sub>3</sub>):  $\delta$  (ppm) 216.1, 206.7, 136.4, 134.4, 130.2, 129.1, 73.1, 73.0, 63.1, 56.7, 41.7, 36.8, 29.6, 27.4, 24.8, 23.8. HRMS (ESI-TOF) m/z: [M + Na]<sup>+</sup> calcd. for C<sub>18</sub>H<sub>19</sub>NO<sub>4</sub>SNa 368.0927; Found 368.0921.

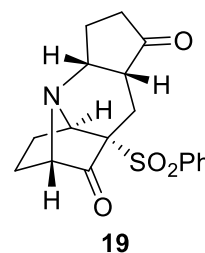

### Synthesis of (1*S*,3*aR*,4*S*,5*aR*,9*aR*)-4-(phenylsulfonyl)decahydro-1,4-methanopyrrolo[1,2-*a*]quinoline-6,11(1*H*)-dione (20)

Prepared according to General Procedure B using **17** (300 mg, 0.653 mmol). Purification by column chromatography (silica gel 100-200mesh, 50% EtOAc in hexanes). The resulting solid was triturated with ethyl acetate to afford **20** as a white solid (117.3 mg, 50% BRSM yield).  $R_f = 0.25$  (60% ethyl acetate in hexane), mp = 168-170 °C,  $[\alpha]_D^{25} = +65.1$  ( $c$  1.4, CHCl<sub>3</sub>); **<sup>1</sup>H NMR** (500 MHz, CDCl<sub>3</sub>):  $\delta$  (ppm) 7.98 (d,  $J = 8.1$  Hz, 2H), 7.67 (t,  $J = 7.5$  Hz, 1H), 7.57 (t,  $J = 7.9$  Hz, 2H), 4.02 (d,  $J = 4.5$  Hz, 1H), 3.50 (d,  $J = 5.2$  Hz, 1H), 3.30 (dd,  $J = 14.4, 6.8$  Hz, 1H), 2.82 – 2.72 (m, 1H), 2.64 – 2.54 (m, 1H), 2.44 – 2.33 (m, 2H), 2.28 (dt,  $J = 15.2, 4.9$  Hz, 1H), 2.11 – 1.99 (m, 2H), 1.98 – 1.87 (m, 3H), 1.84 – 1.76 (m, 1H), 1.69 – 1.57 (m, 2H). **<sup>13</sup>C{<sup>1</sup>H} NMR** (126 MHz, CDCl<sub>3</sub>):  $\delta$  (ppm) 209.8, 207.4, 136.6, 134.4, 130.3, 129.1, 74.1, 71.6, 62.3, 56.7, 46.8, 38.7, 30.6, 28.4, 24.6, 24.1, 21.4. HRMS (ESI-TOF)  $m/z$ :  $[M + Na]^+$  calcd. for C<sub>19</sub>H<sub>21</sub>NO<sub>4</sub>SNa 382.1083; Found 382.1081.

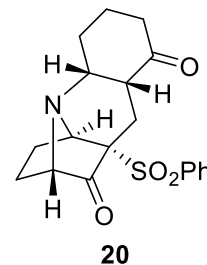

### Synthesis of (1*S*,3*aR*,4*S*,5*aR*,9*aS*)-4-(phenylsulfonyl)decahydro-1,4-methanopyrrolo[1,2-*a*]quinoline-6,11(1*H*)-dione (21)

Prepared according to General Procedure C using **17** (200 mg, 0.435 mmol). Purification by column chromatography (silica gel 100-200mesh, 50% EtOAc in hexanes) afforded **21** as a white solid (124.1 mg, 95% yield).  $R_f = 0.25$  (60% ethyl acetate in hexane), mp = 156-158 °C,  $[\alpha]_D^{25} = +56.1$  ( $c$  1.1, CHCl<sub>3</sub>); **<sup>1</sup>H NMR** (600 MHz, CDCl<sub>3</sub>):  $\delta$  (ppm) 7.99 (d,  $J = 8.1$  Hz, 2H), 7.66 (t,  $J = 7.4$  Hz, 1H), 7.58 (t,  $J = 7.7$  Hz, 2H), 3.74 (d,  $J = 4.2$  Hz, 1H), 3.70 (d,  $J = 5.8$  Hz, 1H), 3.02 (t,  $J = 11.5$  Hz, 1H), 2.77 – 2.71 (m, 1H), 2.40 (td,  $J = 12.1, 4.3$  Hz, 1H), 2.29 (d,  $J = 13.8$  Hz, 1H), 2.19 – 2.13 (m, 2H), 2.12 – 2.02 (m, 3H), 1.91 (td,  $J = 12.2, 5.8$  Hz, 1H), 1.88 – 1.82 (m, 1H), 1.78 (dd,  $J = 12.9, 4.3$  Hz, 1H), 1.65 – 1.57 (m, 2H). **<sup>13</sup>C{<sup>1</sup>H} NMR** (151 MHz, CDCl<sub>3</sub>):  $\delta$  (ppm) 208.0, 206.9, 136.7, 134.4, 130.1, 129.2, 74.6, 69.2, 66.3, 61.7, 51.0, 40.5, 30.6, 30.2, 24.8, 23.9, 23.4. HRMS (ESI-TOF)  $m/z$ :  $[M + H]^+$  calcd. for C<sub>19</sub>H<sub>22</sub>NO<sub>4</sub>S 360.1264; Found 360.1257.

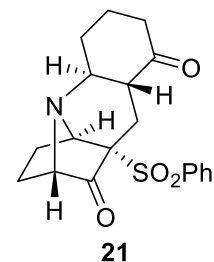

### Synthesis of (1*S*,3*aR*,4*S*,5*aR*,10*aR*)-4-(phenylsulfonyl)dodecahydro-6*H*-1,4-methanocyclohepta[*e*]indolizine-6,12-dione (22)

Prepared according to General Procedure C using **18** (150 mg, 0.317 mmol). Purification by column chromatography (silica gel 100-200mesh, 35% EtOAc in hexanes) afforded **22** as a brown semi solid (71 mg, 60% yield).  $R_f = 0.45$  (60% ethyl acetate in hexane), mp = 96-102 °C,  $[\alpha]_D^{25} = +109.2$  ( $c$  1.0,  $\text{CHCl}_3$ );  $^1\text{H NMR}$  (500 MHz,  $\text{CDCl}_3$ ):  $\delta$  (ppm) 8.00 (d,  $J = 7.9$  Hz, 2H), 7.69 – 7.64 (m, 1H), 7.59 (t,  $J = 7.7$  Hz, 2H), 3.73 (d,  $J = 3.7$  Hz, 1H), 3.58 (d,  $J = 6.2$  Hz, 1H), 3.56 – 3.51 (m, 1H), 2.79 – 2.70 (m, 2H), 2.48 (dd,  $J = 18.1, 7.1$  Hz, 1H), 2.32 – 2.26 (m, 1H), 2.13 – 2.03 (m, 2H), 1.94 – 1.75 (m, 6H), 1.62 – 1.54 (m, 1H), 1.50 (dd,  $J = 12.6, 10.2$  Hz, 1H), 1.46 – 1.37 (m, 1H).  $^{13}\text{C}\{^1\text{H}\}$  NMR (126 MHz,  $\text{CDCl}_3$ ):  $\delta$  (ppm) 210.6, 208.3, 136.5, 134.3, 130.2, 129.1, 74.3, 71.0, 62.4, 55.9, 48.4, 41.8, 33.6, 29.6, 28.9, 28.3, 24.8, 24.3. HRMS (ESI-TOF)  $m/z$ :  $[\text{M} + \text{Na}]^+$  calcd. for  $\text{C}_{20}\text{H}_{23}\text{NO}_4\text{SNa}$  396.1240; Found 396.1232.

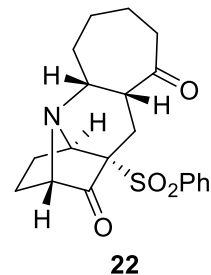

#### Synthesis of (1*S*,3*aR*,4*S*,5*aR*,10*aS*)-4-(phenylsulfonyl)dodecahydro-6*H*-1,4-methanocyclohepta[*e*]indolizine-6,12-dione (**23**)

Prepared according to General Procedure B using **18** (150 mg, 0.317 mmol). Purification by column chromatography (silica gel 100-200mesh, 30% EtOAc in hexanes) afforded **23** as a white solid (59.1 mg, 50% BRSM yield).  $R_f = 0.5$  (60% ethyl acetate in hexane), mp = 152-154 °C,  $[\alpha]_D^{25} = +60.6$  ( $c$  2.8,  $\text{CHCl}_3$ );  $^1\text{H NMR}$  (500 MHz,  $\text{CDCl}_3$ )  $\delta$  7.96 (d,  $J = 7.5$  Hz, 2H), 7.66 – 7.62

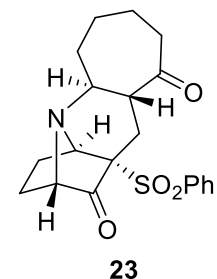

(m, 1H), 7.55 (t,  $J = 7.4$  Hz, 2H), 3.75 (d,  $J = 3.7$  Hz, 1H), 3.71 (d,  $J = 5.8$  Hz, 1H), 2.86 (td,  $J = 10.9, 2.9$  Hz, 1H), 2.81 – 2.75 (m, 1H), 2.72 – 2.65 (m, 1H), 2.59 – 2.53 (m, 1H), 2.42 – 2.36 (m, 1H), 2.31 (ddd,  $J = 17.3, 12.0, 5.4$  Hz, 1H), 2.08 (d,  $J = 13.4$  Hz, 1H), 2.01 (dt,  $J = 11.9, 7.0$  Hz, 1H), 1.94 – 1.77 (m, 4H), 1.60 – 1.51 (m, 2H), 1.44 (td,  $J = 13.7, 2.6$  Hz, 1H), 1.17 – 1.08 (m, 1H).  $^{13}\text{C}\{^1\text{H}\}$  NMR (126 MHz,  $\text{CDCl}_3$ ):  $\delta$  (ppm) 210.7, 207.9, 136.8, 134.2, 130.2, 129.1, 73.8, 68.2, 65.9, 58.3, 49.9, 44.0, 37.3, 31.9, 25.7, 24.3, 24.0, 22.9. HRMS (ESI-TOF)  $m/z$ :  $[\text{M} + \text{Na}]^+$  calcd. for  $\text{C}_{20}\text{H}_{23}\text{NO}_4\text{SNa}$  396.1240; Found 396.1230.

#### Synthesis of (1*S*,3*aR*,4*S*,5*aR*,8*aR*)-methyl 6-oxo-4-(phenylsulfonyl)decahydro-1*H*-cyclopenta[*e*]indolizine-1-carboxylate (**24**)

Prepared according to General Procedure D using **19** (50mg, 0.145 mmol). Purification by column chromatography (silica gel 100-200 mesh, 50% EtOAc in hexane) afforded **24** as pale red semi solid (46.4 mg, 85% yield).  $R_f = 0.3$  (60% ethyl acetate in hexane), mp = 104-110 °C,  $[\alpha]_D^{25} = +4.0$  (*c* 0.4, CHCl<sub>3</sub>); <sup>1</sup>H NMR (600 MHz, CDCl<sub>3</sub>):  $\delta$  (ppm) 7.79 (d, *J* = 7.8 Hz, 2H), 7.63 (t, *J* = 7.4 Hz, 1H), 7.53 (t, *J* = 7.7 Hz, 2H), 3.78 – 3.73 (m, 1H),

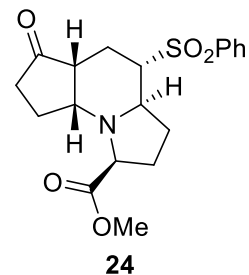

3.68 (s, 3H), 3.48 (dd, *J* = 9.8, 5.6 Hz, 1H), 3.07 – 3.01 (m, 1H), 2.98 (td, *J* = 9.6, 5.5 Hz, 1H), 2.44 (dd, *J* = 19.3, 8.5 Hz, 1H), 2.36 – 2.29 (m, 2H), 2.18 – 2.11 (m, 1H), 2.10 – 2.02 (m, 1H), 1.98 – 1.91 (m, 2H), 1.90 – 1.83 (m, 1H), 1.81 – 1.75 (m, 1H), 1.71 (ddd, *J* = 13.4, 6.5, 3.0 Hz, 1H), 1.43 (q, *J* = 13.1 Hz, 1H). <sup>13</sup>C{<sup>1</sup>H} NMR (151 MHz, CDCl<sub>3</sub>):  $\delta$  (ppm) 215.8, 173.7, 137.7, 134.1, 129.4, 128.5, 64.6, 60.2, 55.4, 54.5, 52.2, 45.5, 36.7, 29.2, 27.2, 22.9, 16.9. HRMS (ESI-TOF) *m/z*: [M + Na]<sup>+</sup> calcd. for C<sub>19</sub>H<sub>23</sub>NO<sub>5</sub>SNa 400.1189; Found 400.1185.

#### Synthesis of (1*S*,3*aR*,4*S*,5*aR*,9*aR*)-methyl-6-oxo-4-(phenylsulfonyl)dodecahydropyrrolo[1,2-*a*]quinoline-1-carboxylate (**25**)

Prepared according to General Procedure D using **20** (50mg, 0.139 mmol). Purification by column chromatography (silica gel 100-200 mesh, 40% EtOAc in hexane) afforded **25** as white solid (52.3 mg, 96% yield).  $R_f = 0.35$  (60% ethyl acetate in hexane), mp = 180-182 °C,  $[\alpha]_D^{25} = +61.7$  (*c* 1.2, CHCl<sub>3</sub>); <sup>1</sup>H NMR (600 MHz, CDCl<sub>3</sub>):  $\delta$  (ppm) 7.81 (d, *J* = 7.9 Hz, 2H), 7.65 (t, *J* = 7.3 Hz, 1H), 7.54 (t, *J* = 7.6 Hz, 2H), 3.67 (s,

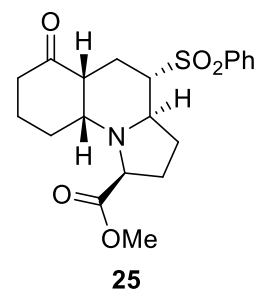

3H), 3.56 (dd, *J* = 9.6, 5.1 Hz, 1H), 3.32 – 3.26 (m, 1H), 3.17 (td, *J* = 9.6, 5.7 Hz, 1H), 3.05 – 2.99 (m, 1H), 2.63 (dd, *J* = 8.5, 4.8 Hz, 1H), 2.34 – 2.23 (m, 3H), 2.06 – 1.94 (m, 3H), 1.89 (q, *J* = 13.0 Hz, 1H), 1.82 – 1.67 (m, 3H), 1.63 (dt, *J* = 12.9, 3.9 Hz, 1H), 1.45 – 1.37 (m, 1H). <sup>13</sup>C{<sup>1</sup>H} NMR (151 MHz, CDCl<sub>3</sub>):  $\delta$  (ppm) 211.3, 173.7, 137.9, 134.2, 129.5, 128.6, 65.7, 59.8, 55.5, 54.0, 52.2, 51.5, 37.9, 30.1, 27.4, 24.7, 21.6, 16.6. HRMS (ESI-TOF) *m/z*: [M + Na]<sup>+</sup> calcd. for C<sub>20</sub>H<sub>25</sub>NO<sub>5</sub>SNa 400.1189; Found 400.1185.

### Synthesis of (1*S*,3*aR*,4*S*,5*aR*,9*aS*)-methyl-6-oxo-4-(phenylsulfonyl)dodecahydropyrrolo[1,2-*a*]quinoline-1-carboxylate (**26**)

Prepared according to General Procedure D using **21** (50mg, 0.139 mmol). Purification by column chromatography (silica gel 100-200 mesh, 50% EtOAc in hexane) afforded **26** as white solid (47.9 mg, 88% yield).  $R_f = 0.25$  (60% ethyl acetate in hexane), mp = 166-168 °C,  $[\alpha]_D^{25} = +18.1$  ( $c$  1.1, CHCl<sub>3</sub>); <sup>1</sup>H NMR (600 MHz, CDCl<sub>3</sub>):  $\delta$  (ppm) 7.88 – 7.85 (m, 2H), 7.64 (t,  $J = 7.4$  Hz, 1H), 7.56 (t,  $J = 7.7$  Hz, 2H), 3.72 (s, 3H), 3.31 (dd,  $J = 10.8$ ,

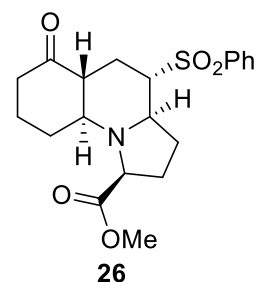

4.0 Hz, 1H), 3.23 (br s, 1H), 2.55 (dd,  $J = 11.8, 7.3$  Hz, 1H), 2.46 – 2.38 (m, 2H), 2.33 – 2.29 (m, 1H), 2.26 – 2.13 (m, 3H), 2.01 (ddd,  $J = 9.1, 6.0, 2.6$  Hz, 1H), 1.94 (dt,  $J = 13.8, 3.7$  Hz, 1H), 1.92 – 1.83 (m, 3H), 1.67 – 1.58 (m, 2H), 1.58 – 1.49 (m, 1H). <sup>13</sup>C{<sup>1</sup>H} NMR (151 MHz, CDCl<sub>3</sub>):  $\delta$  (ppm) 207.9, 175.5, 137.8, 134.0, 129.4, 128.8, 67.2, 64.7, 63.6, 62.7, 52.9, 52.4, 40.7, 30.2, 29.7, 29.0, 25.5, 23.2. HRMS (ESI-TOF)  $m/z$ :  $[M + H]^+$  calcd. for C<sub>20</sub>H<sub>26</sub>NO<sub>5</sub>S 392.1526; Found 392.1519.

### Synthesis of (1*S*,3*aR*,4*S*,5*aR*,10*aR*)-methyl-6-oxo-4-(phenylsulfonyl)dodecahydro-1*H*-cyclohepta[*e*]indolizine-1-carboxylate (**27**)

Prepared according to General Procedure D using **22** (50mg, 0.133 mmol). Purification by column chromatography (silica gel 100-200 mesh, 30% EtOAc in hexane) afforded **27** as pale red semi solid (48.9 mg, 88% yield).  $R_f = 0.5$  (60% ethyl acetate in hexane), mp = 130-136 °C,  $[\alpha]_D^{25} = +22.8$  ( $c$  0.6, CHCl<sub>3</sub>); <sup>1</sup>H NMR (600 MHz, CDCl<sub>3</sub>):  $\delta$  (ppm) 7.83 – 7.80 (m, 2H), 7.60 (dd,  $J = 10.7, 4.2$  Hz, 1H), 7.51 (t,  $J = 7.8$  Hz, 2H), 3.67 (s,

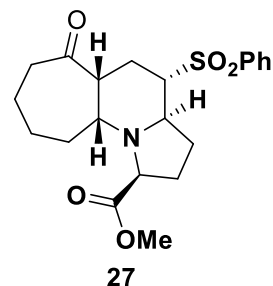

3H), 3.61 (br s, 1H), 3.43 (t,  $J = 7.2$  Hz, 1H), 2.95 (br s, 1H), 2.79 (dd,  $J = 15.0, 9.3$  Hz, 1H), 2.66 – 2.56 (m, 2H), 2.30 – 2.22 (m, 2H), 2.12 (dt,  $J = 14.1, 4.1$  Hz, 1H), 1.98 (dd,  $J = 14.4, 8.6$  Hz, 2H), 1.85 (dd,  $J = 11.9, 8.9$  Hz, 2H), 1.74 – 1.66 (m, 1H), 1.63 (d,  $J = 14.2$  Hz, 1H), 1.57 – 1.50 (m, 1H), 1.40 – 1.32 (m, 1H), 1.22 – 1.13 (m, 2H). <sup>13</sup>C{<sup>1</sup>H} NMR (151 MHz, CDCl<sub>3</sub>):  $\delta$  (ppm) 211.8, 173.9, 137.9, 134.0, 129.4, 128.8, 66.1, 59.8, 55.8, 54.6, 52.2, 51.5, 42.0, 29.8, 28.9, 27.5, 27.2, 22.9, 22.5. HRMS (ESI-TOF)  $m/z$ :  $[M + Na]^+$  calcd. for C<sub>21</sub>H<sub>27</sub>NO<sub>5</sub>SNa 428.1502; Found 428.1497.

### Synthesis of (1*S*,3*aR*,4*S*,5*aR*,10*aS*)-methyl-6-oxo-4-(phenylsulfonyl)dodecahydro-1*H*-cyclohepta[*e*]indolizine-1-carboxylate (**28**)

Prepared according to General Procedure D using **23** (50mg, 0.133 mmol). Purification by column chromatography (silica gel 100-200 mesh, 30% EtOAc in hexane) afforded **28** as pale red solid (46.2 mg, 88% yield).

$R_f = 0.5$  (60% ethyl acetate in hexane), mp = 146-148 °C,  $[\alpha]_D^{25} = +9.6$  (c 0.28, CHCl<sub>3</sub>); <sup>1</sup>H NMR (600 MHz, CDCl<sub>3</sub>):  $\delta$  (ppm) 7.82 (d,  $J = 8.0$  Hz, 2H), 7.63 (t,  $J = 7.4$  Hz, 1H), 7.53 (t,  $J = 7.6$  Hz, 2H), 3.67 (s, 3H), 3.35 –

3.31 (m, 1H), 3.23 – 3.14 (m, 1H), 2.78 – 2.71 (m, 1H), 2.67 – 2.62 (m, 1H), 2.48 – 2.43 (m, 1H), 2.41 – 2.34 (m, 2H), 2.26 – 2.20 (m, 1H), 2.12 – 2.05 (m, 1H), 1.99 – 1.91 (m, 1H), 1.88 – 1.76 (m, 5H), 1.66 – 1.57 (m, 2H), 1.40 – 1.33 (m, 1H), 1.17 – 1.09 (m, 1H). <sup>13</sup>C{<sup>1</sup>H} NMR (151 MHz, CDCl<sub>3</sub>):  $\delta$  (ppm) 211.7, 176.0, 137.8, 134.0, 129.3, 128.8, 64.6, 64.2, 63.4, 62.7, 53.0, 52.3, 43.2, 35.1, 30.0, 29.1, 28.4, 24.6, 22.8. HRMS (ESI-TOF) m/z:  $[M + Na]^+$  calcd. for C<sub>21</sub>H<sub>27</sub>NO<sub>5</sub>Na 428.1502; Found 428.1495.

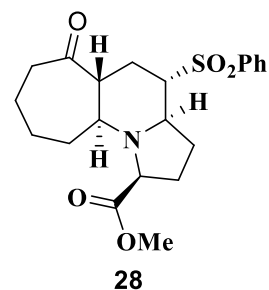

#### Synthesis of (1S,3aR,4S,5aS,9aS)-4-(phenylsulfonyl)decahydro-6H-1,5a-methanopyrrolo[1,2-a]quinoline-6,11-dione (**29**)

A crude diastereomeric mixture containing compounds **20** (*cis*) and **21** (*trans*) (ca. 2.25:1) was dissolved in dry THF (0.1 M) under an argon atmosphere. To this stirred solution was added DBU (2.0 equiv) at room temperature, and the reaction mixture was stirred for 2 h. Upon completion, the reaction mixture was concentrated under reduced pressure. The crude residue was purified by column chromatography on silica gel using a mixture of ethyl acetate and hexane to afford the ring-opened product **29**, arising from selective conversion of the *trans* isomer **21**, while the *cis* isomer **20** remained unreacted. When the reaction was performed using the isolated *trans* isomer **21** (50 mg, 0.139 mmol) under identical conditions, product **29** was obtained as a pale yellow solid (47.5 mg, 95% yield).  $R_f = 0.2$  (60% ethyl acetate in hexane), mp = 192-194 °C;  $[\alpha]_D^{25} = +17.1$  (c 0.38, CHCl<sub>3</sub>); <sup>1</sup>H NMR (600 MHz, CDCl<sub>3</sub>):  $\delta$  (ppm) 7.82 (d,  $J = 7.5$  Hz, 2H), 7.68 (t,  $J = 7.3$  Hz, 1H), 7.58 (t,  $J = 7.2$  Hz, 2H), 4.14 – 4.09 (m, 1H), 3.83 (d,  $J = 9.3$  Hz, 1H), 3.67 (dd,  $J = 10.2, 5.8$  Hz, 1H), 2.94 (dd,  $J = 18.2, 9.0$  Hz, 1H), 2.39 (d,  $J = 14.7$  Hz, 1H), 2.34 – 2.27 (m, 2H), 2.25 – 2.14 (m, 3H), 2.08 – 1.91 (m, 3H), 1.85 – 1.80 (m, 1H), 1.62 – 1.50 (m, 2H). <sup>13</sup>C NMR (151 MHz, CDCl<sub>3</sub>):  $\delta$  (ppm) 216.8, 203.6, 137.3, 134.5, 129.7, 128.8, 65.8, 65.7, 60.6, 59.2, 59.1, 40.2, 34.8, 32.3, 28.1, 25.1, 21.9. HRMS (ESI-TOF) m/z:  $[M + Na]^+$  calcd. for C<sub>19</sub>H<sub>21</sub>NO<sub>4</sub>SNa 382.1083; Found 382.1090.

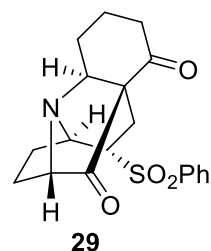

#### 4. X-Ray Crystallography

##### X-Ray Crystal Analysis of Compound 19 (CCDC No. 2521102)

Crystals were grown using ethyl acetate (major)/hexane(minor) as a solvent in a conical. Gradual evaporation of solvent at room temperature was carried out for crystallization.

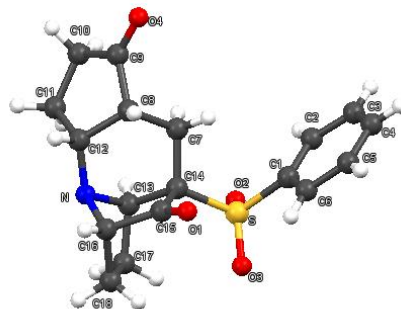

|                 |                          |                                  |                           |
|-----------------|--------------------------|----------------------------------|---------------------------|
| Bond precision: | C-C = 0.0046 Å           | Wavelength=1.54184               |                           |
| Cell:           | a=8.0410 (1)<br>alpha=90 | b=7.5103 (1)<br>beta=102.460 (1) | c=13.5277 (2)<br>gamma=90 |
| Temperature:    | 298 K                    |                                  |                           |
| Volume Space    | Calculated               | Reported                         |                           |
| group Hall      | 797.701 (19)             | 797.701 (19)                     |                           |
| group           | P 21                     | P 1 21 1                         |                           |
| Moiety formula  | P 2yb                    | P 2yb                            |                           |
| Sum formula     | C18 H19 N O4 S           | C18 H19 N O4 S                   |                           |
| Mr              | C18 H19 N O4 S           | C18 H19 N O4 S                   |                           |
| Dx,g cm-3       | 345.40                   | 345.40                           |                           |
| Z               | 1.438                    | 1.438                            |                           |
| Mu (mm-1)       | 2                        | 2                                |                           |
| F000            | 2.003                    | 2.003                            |                           |
| F000'           | 364.0                    | 364.0                            |                           |
| h,k,lmax        | 365.73                   | 9,8,16                           |                           |
| Nref            | 9,9,16                   | 2245                             |                           |
| Tmin,Tmax       | 2912[ 1577]              | 0.827,1.000                      |                           |
| Tmin'           | 0.887,0.905              | 0.818                            |                           |

Correction method= # Reported T Limits: Tmin=0.827 Tmax=1.000 AbsCorr = MULTI-SCAN

Data completeness= 1.42/0.77

Theta(max)= 67.989

R(reflections)= 0.0309( 2184)

wR2(reflections)=  
0.0803( 2245)

S = 1.040

Npar= 217

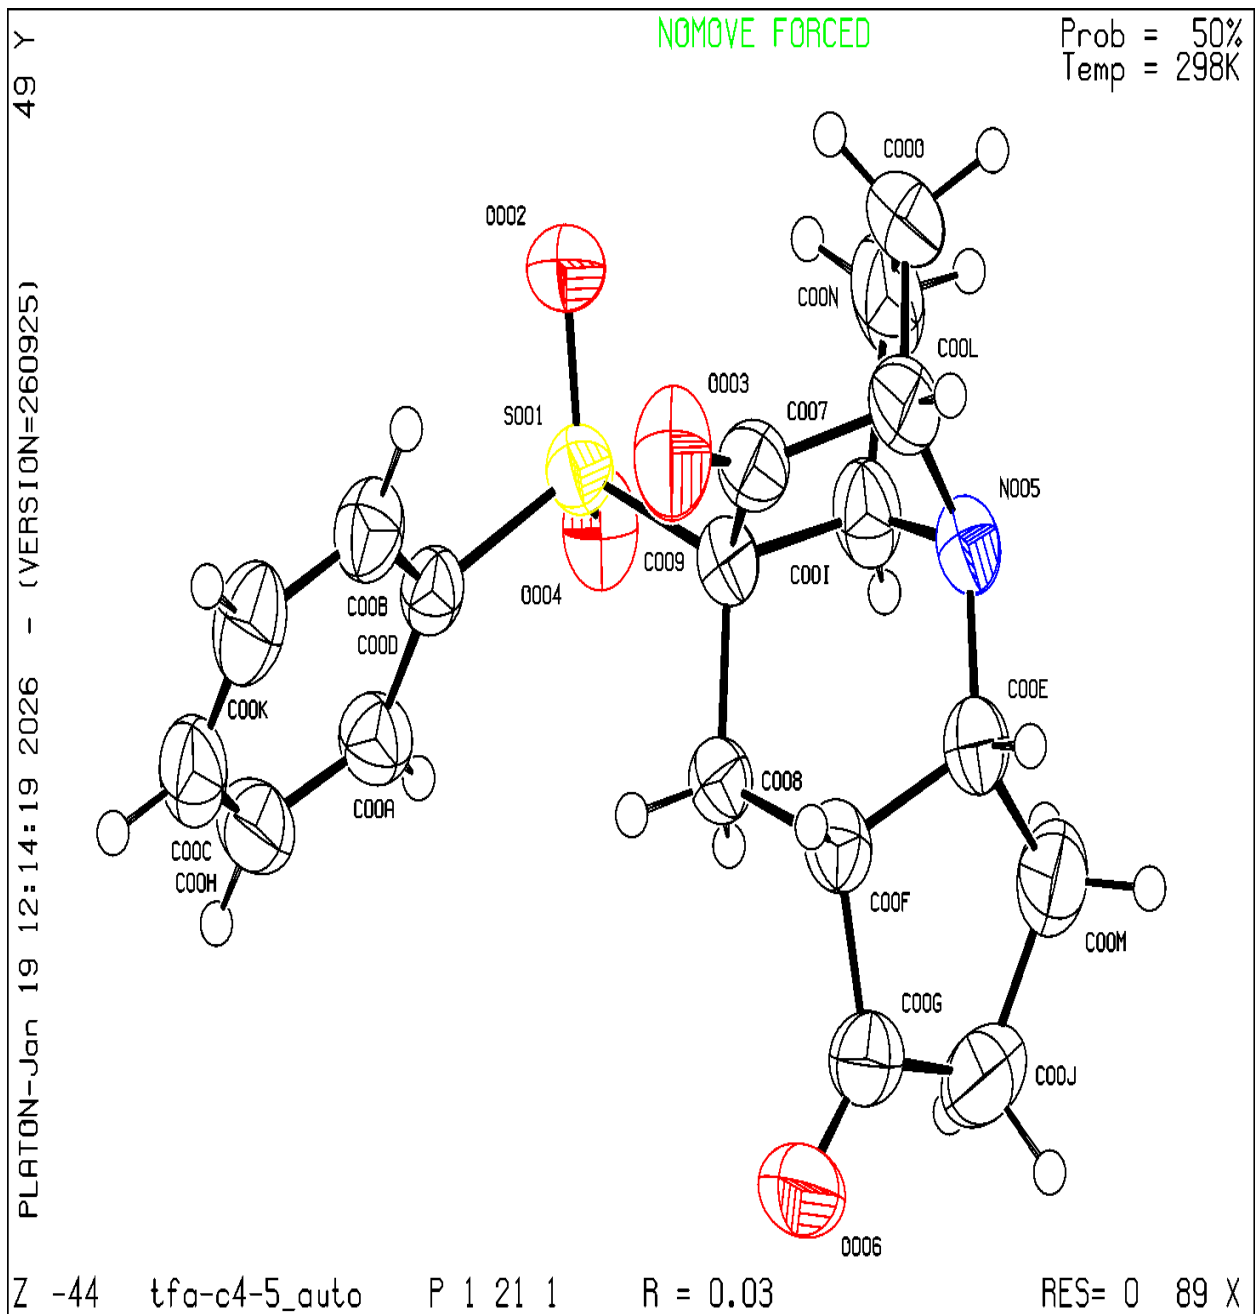

**Figure S1.** Thermal Ellipsoid are plotted at the 50% probability level

**X-Ray Crystal Analysis of Compound 20 (CCDC No. 2433359)**

Crystals were grown using ethyl acetate (major)/hexane(minor) as a solvent in a conical. Gradual evaporation of solvent at room temperature was carried out for crystallization.

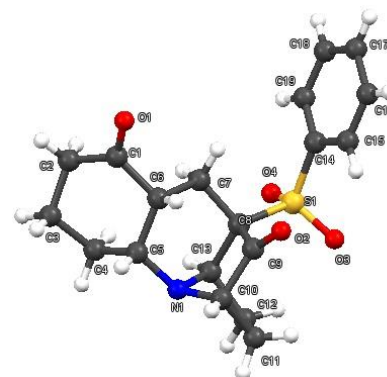

Bond precision: C-C = 0.0044 Å Wavelength=1.54184

Cell: a=8.0273 (1) b=7.6845 (1) c=13.7609 (2)  
 alpha=90 beta=100.662 (1) gamma=90

Temperature: 293 K

|                | Calculated     | Reported       |
|----------------|----------------|----------------|
| Volume Space   | 834.20 (2)     | 834.197 (19)   |
| group Hall     | P 21           | P 1 21 1       |
| group          | P 2yb          | P 2yb          |
| Moiety formula | C19 H21 N O4 S | C19 H21 N O4 S |
| Sum formula    | C19 H21 N O4 S | C19 H21 N O4 S |
| Mr             | 359.43         | 359.43         |
| Dx,g cm-3      | 1.431          | 1.431          |
| Z              | 2              | 2              |
| Mu (mm-1)      | 1.937          | 1.937          |
| F000           | 380.0          | 380.0          |
| F000'          | 381.77         |                |
| h,k,lmax       | 9,9,16         | 9,9,16         |
| Nref           | 3051[ 1649]    | 2799           |
| Tmin,Tmax      | 0.947,0.955    | 0.697,1.000    |
| Tmin'          | 0.947          |                |

Correction method= # Reported T Limits: Tmin=0.697 Tmax=1.000 AbsCorr = MULTI-SCAN

Data completeness= 1.70/0.92 Theta(max)= 68.114  
 R(reflections)= 0.0335( 2676) wR2(reflections)=  
 0.0867( 2799)

S = 1.025 Npar= 226

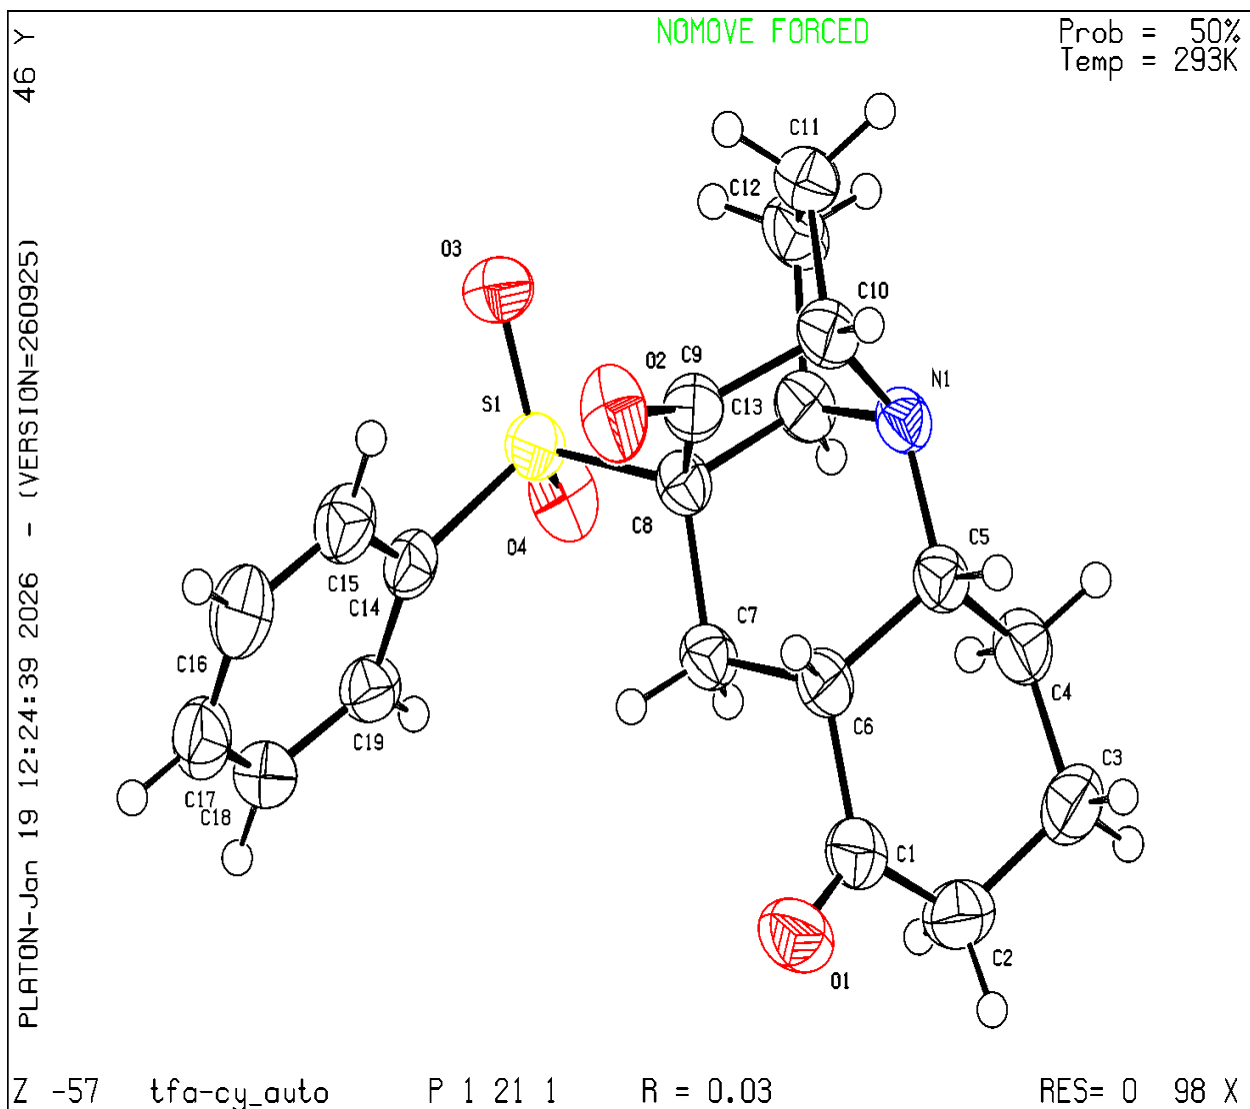

**Figure S2.** Thermal Ellipsoid are plotted at the 50% probability level

**X-Ray Crystal Analysis of Compound 21 (CCDC No. 2521350)**

Crystals were grown using ethyl acetate (major)/hexane(minor) as a solvent in a conical. Gradual evaporation of solvent at room temperature was carried out for crystallization.

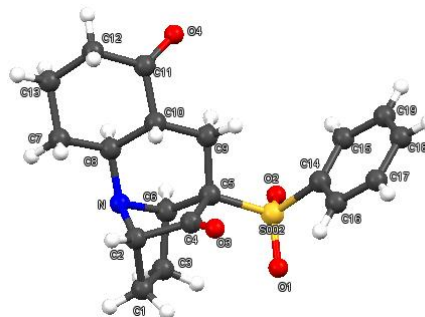

Bond precision: C-C = 0.0048 Å

Wavelength=1.54184

Cell: a=9.9321 (1)

b=19.3107 (2)

c=10.3792 (1)

alpha=90

beta=117.980 (2)

gamma=90

Temperature: 298 K

|                | Calculated     | Reported          |
|----------------|----------------|-------------------|
| Volume Space   | 1758.00 (4)    | 1758.00 (4)       |
| group Hall     | P 21           | P 1 21 1          |
| group          | P 2yb          | P 2yb             |
| Moiety formula | C19 H21 N O4 S | 2(C19 H21 N O4 S) |
| Sum formula    | C19 H21 N O4 S | C38 H42 N2 O8 S2  |
| Mr             | 359.43         | 718.85            |
| Dx,g cm-3      | 1.358          | 1.358             |
| Z              | 4              | 2                 |
| Mu (mm-1)      | 1.839          | 1.839             |
| F000           | 760.0          | 760.0             |
| F000'          | 763.53         |                   |
| h,k,lmax       | 11,23,12       | 11,23,12          |
| Nref           | 6419[ 3312]    | 4747              |
| Tmin,Tmax      | 0.832,0.912    | 0.941,1.000       |
| Tmin'          | 0.832          |                   |

Correction method= # Reported T Limits: Tmin=0.941 Tmax=1.000 AbsCorr = MULTI-SCAN

Data completeness= 1.43/0.74

Theta(max)= 68.099

R(reflections)= 0.0312( 4600)

wR2(reflections)=

0.0790( 4747)

S = 1.049

Npar= 451

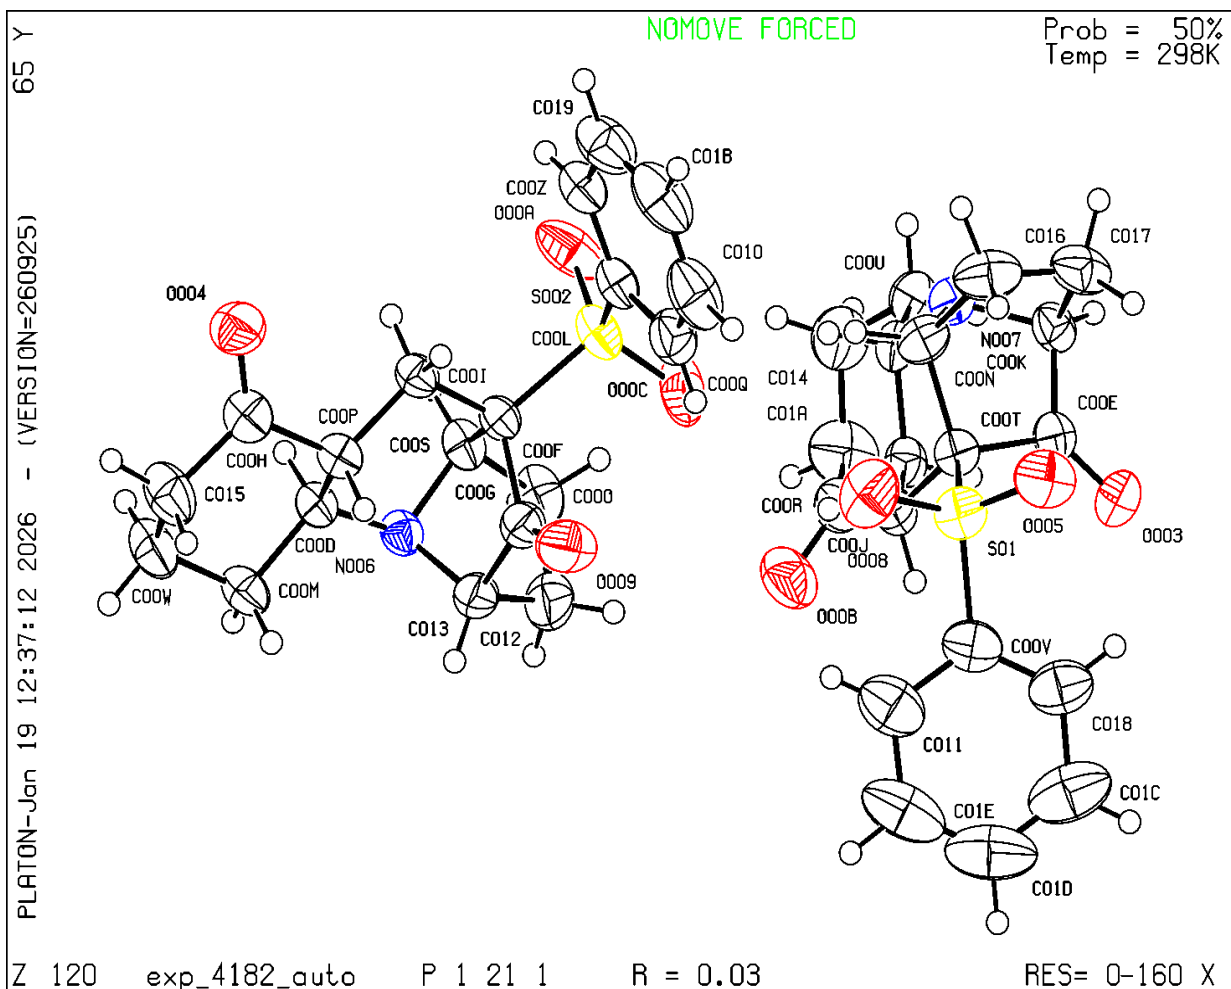

**X-Ray Crystal Analysis of Compound 23 (CCDC No. 2521140)**

Crystals were grown using ethyl acetate (major)/hexane(minor) as a solvent in a conical. Gradual evaporation of solvent at room temperature was carried out for crystallization.

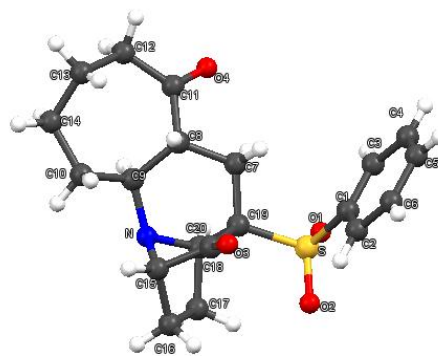

Bond precision: C-C = 0.0035 Å Wavelength=1.54184  
 Cell: a=7.6680 (1) b=8.1645 (1) c=28.5824 (3)  
 alpha=90 beta=90 gamma=90  
 Temperature: 298 K

|                | Calculated    | Reported       |
|----------------|---------------|----------------|
| Volume Space   | 1789.41 (4)   | 1789.41 (4)    |
| group Hall     | P 21 21 21    | P 21 21 21     |
| group          | P 2ac 2ab     | P 2ac 2ab      |
| Moiety formula | C20 H23 NO4 S | C20 H23 N O4 S |
| Sum formula    | C20 H23 NO4 S | C20 H23 N O4 S |
| Mr             | 373.45        | 373.45         |
| Dx,g cm-3      | 1.386         | 1.386          |
| Z              | 4             | 4              |
| Mu (mm-1)      | 1.827         | 1.827          |
| F000           | 792.0         | 792.0          |
| F000'          | 795.60        |                |
| h,k,lmax       | 9,9,34        | 9,9,34         |
| Nref           | 3269[ 1914]   | 3241           |
| Tmin,Tmax      | 0.833,0.913   | 0.854,1.000    |
| Tmin'          | 0.833         |                |

Correction method= # Reported T Limits: Tmin=0.854 Tmax=1.000 AbsCorr = MULTI-SCAN

Data completeness= 1.69/0.99

Theta(max)= 68.128

R(reflections)= 0.0297( 3140)

wR2(reflections)=  
0.0737( 3241)

S = 1.076

Npar= 235

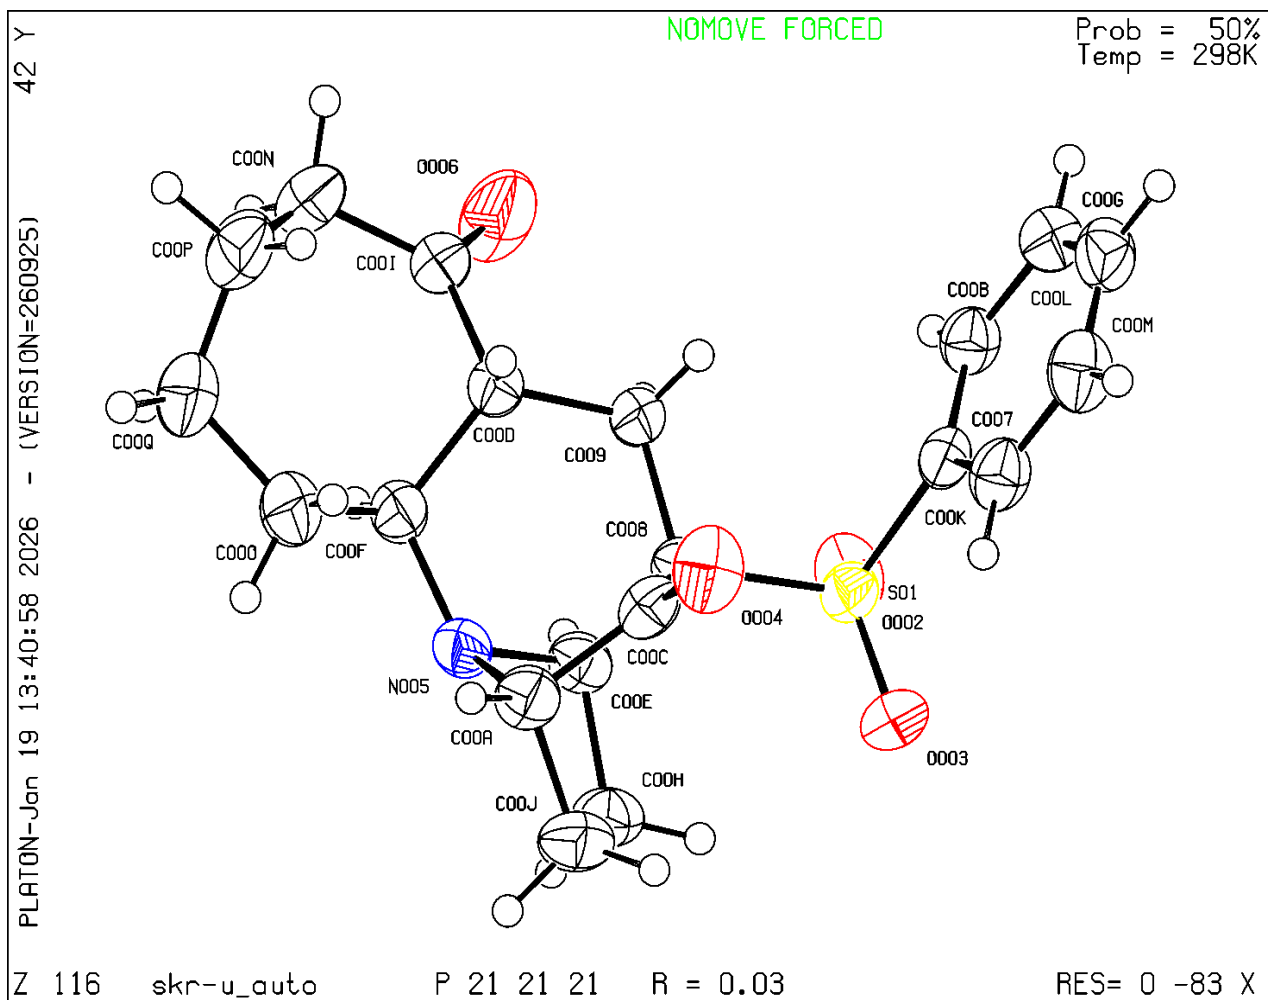

**Figure S4.** Thermal Ellipsoid are plotted at the 50% probability level

## X-Ray Crystal Analysis of Compound 25 (CCDC No. 2521133)

Crystals were grown using ethyl acetate (major)/hexane(minor) as a solvent in a conical. Gradual evaporation of solvent at room temperature was carried out for crystallization.

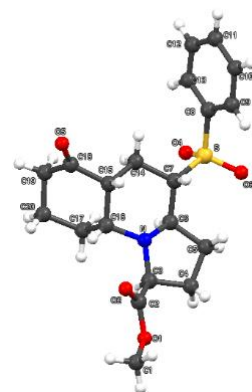



## X-Ray Crystal Analysis of Compound 26 (CCDC No. 2521137)

Crystals were grown using ethyl acetate (major)/hexane(minor) as a solvent in a conical. Gradual evaporation of solvent at room temperature was carried out for crystallization.

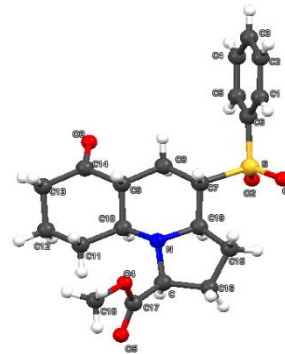

|                 |                |                    |               |
|-----------------|----------------|--------------------|---------------|
| Bond precision: | C-C = 0.0023 Å | Wavelength=1.54184 |               |
| Cell:           | a=9.1584 (1)   | b=19.4423 (2)      | c=10.9820 (1) |
|                 | alpha=90       | beta=104.240(1)    | gamma=90      |
| Temperature:    | 298 K          |                    |               |
|                 | Calculated     | Reported           |               |
| Volume Space    | 1895.38 (3)    | 1895.37 (3)        |               |
| group Hall      | P 21/c         | P 1 21/c 1         |               |
| group           | -P 2ybc        | -P 2ybc            |               |
| Moiety formula  | C20 H25 N O5 S | C20 H25 N O5 S     |               |
| Sum formula     | C20 H25 N O5 S | C20 H25 N O5 S     |               |
| Mr              | 391.47         | 391.47             |               |
| Dx,g cm-3       | 1.372          | 1.372              |               |
| Z               | 4              | 4                  |               |
| Mu (mm-1)       | 1.789          | 1.789              |               |
| F000            | 832.0          | 832.0              |               |
| F000'           | 835.79         |                    |               |
| h,k,lmax        | 11,23,13       | 11,23,13           |               |
| Nref            | 3445           | 3438               |               |
| Tmin,Tmax       | 0.836,0.914    | 0.690,1.000        |               |
| Tmin'           | 0.836          |                    |               |

Correction method= # Reported T Limits: Tmin=0.690 Tmax=1.000 AbsCorr = MULTI-SCAN

Data completeness= 0.998

Theta(max)= 68.080

R(reflections)= 0.0369( 3168)

wR2(reflections)=

0.1035( 3438)

S = 1.034

Npar= 245

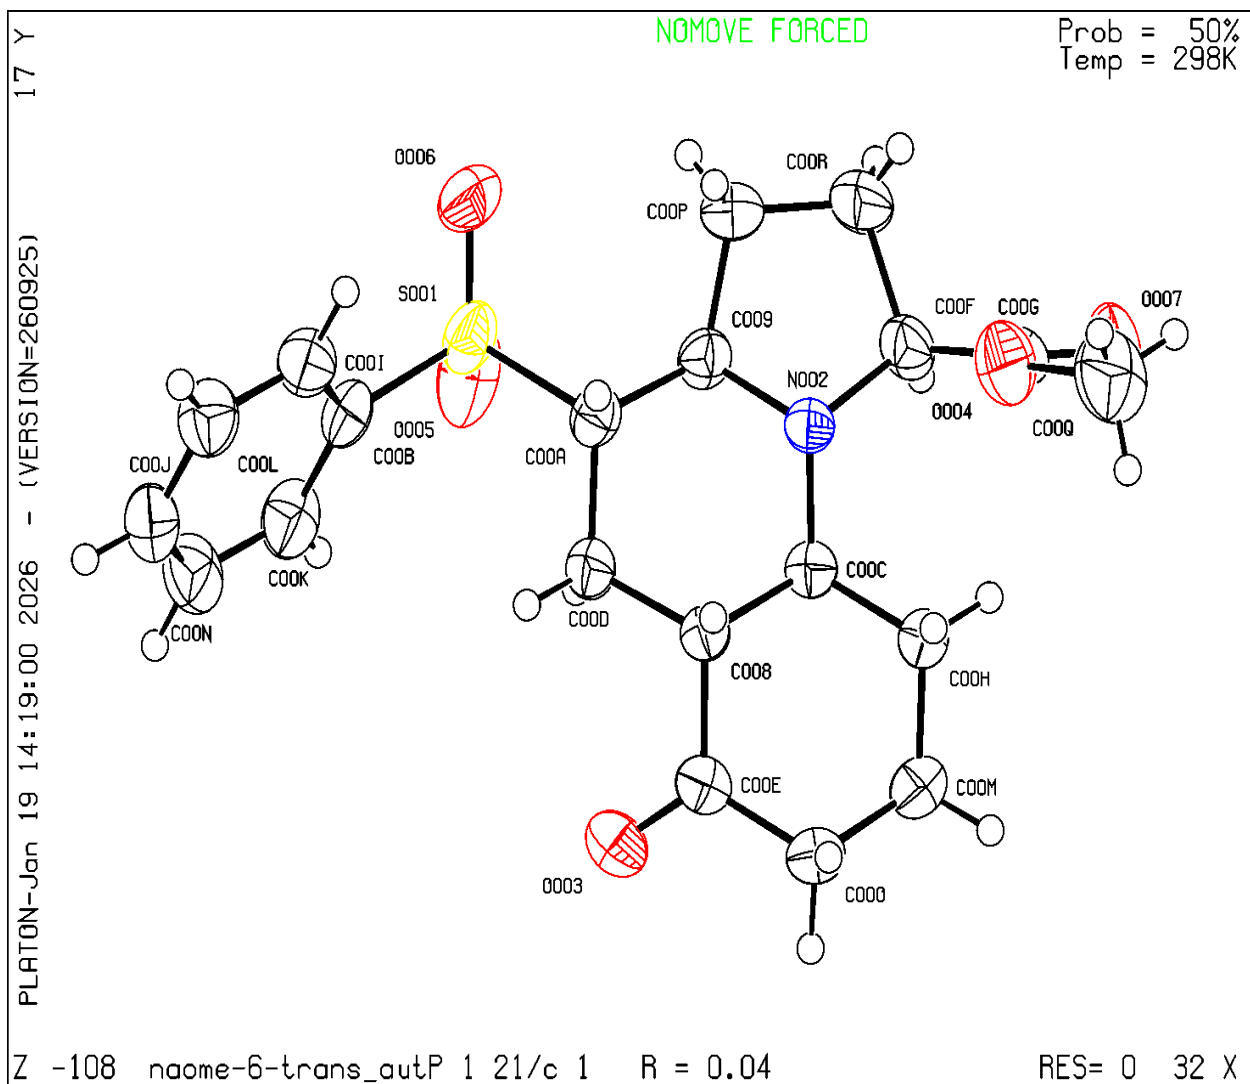

**Figure S6.** Thermal Ellipsoid are plotted at the 50% probability level

## X-Ray Crystal Analysis of Compound 29 (CCDC No. 2546665)

Crystals were grown using ethyl acetate (major)/hexane(minor) as a solvent in a conical. Gradual evaporation of solvent at room temperature was carried out for crystallization.

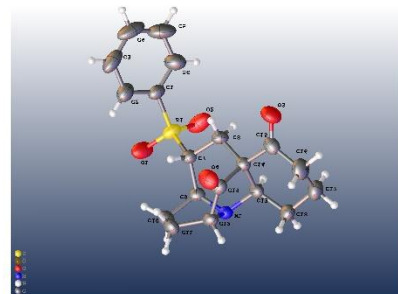

Bond precision: C-C = 0.0045 Å Wavelength=1.54184  
Cell: a=6.1617(1) b=11.2010(2) c=25.0765(4)  
alpha=90 beta=90 gamma=90  
Temperature: 293 K

|                | Calculated     | Reported       |
|----------------|----------------|----------------|
| Volume Space   | 1730.71(5)     | 1730.71(5)     |
| group Hall     | P 21 21 21     | P 21 21 21     |
| group          | P 2ac 2ab      | P 2ac 2ab      |
| Moiety formula | C19 H21 N O4 S | C19 H21 N O4 S |
| Sum formula    | C19 H21 N O4 S | C19 H21 N O4 S |
| Mr             | 359.43         | 359.43         |
| Dx,g cm-3      | 1.379          | 1.379          |
| Z              | 4              | 4              |
| Mu (mm-1)      | 1.868          | 1.868          |
| F000           | 760.0          | 760.0          |
| F000'          | 763.53         |                |
| h,k,lmax       | 7,13,30        | 7,13,30        |
| Nref           | 3167[ 1859]    | 3101           |
| Tmin,Tmax      | 0.546,0.571    | 0.765,1.000    |
| Tmin'          | 0.495          |                |

Correction method= # Reported T Limits: Tmin=0.765 Tmax=1.000 AbsCorr = MULTI-SCAN

Data completeness= 1.67/0.98 Theta(max)= 68.191

R(reflections)= 0.0318( 2868) wR2(reflections)=  
0.0733( 3101)

S = 1.016 Npar= 226

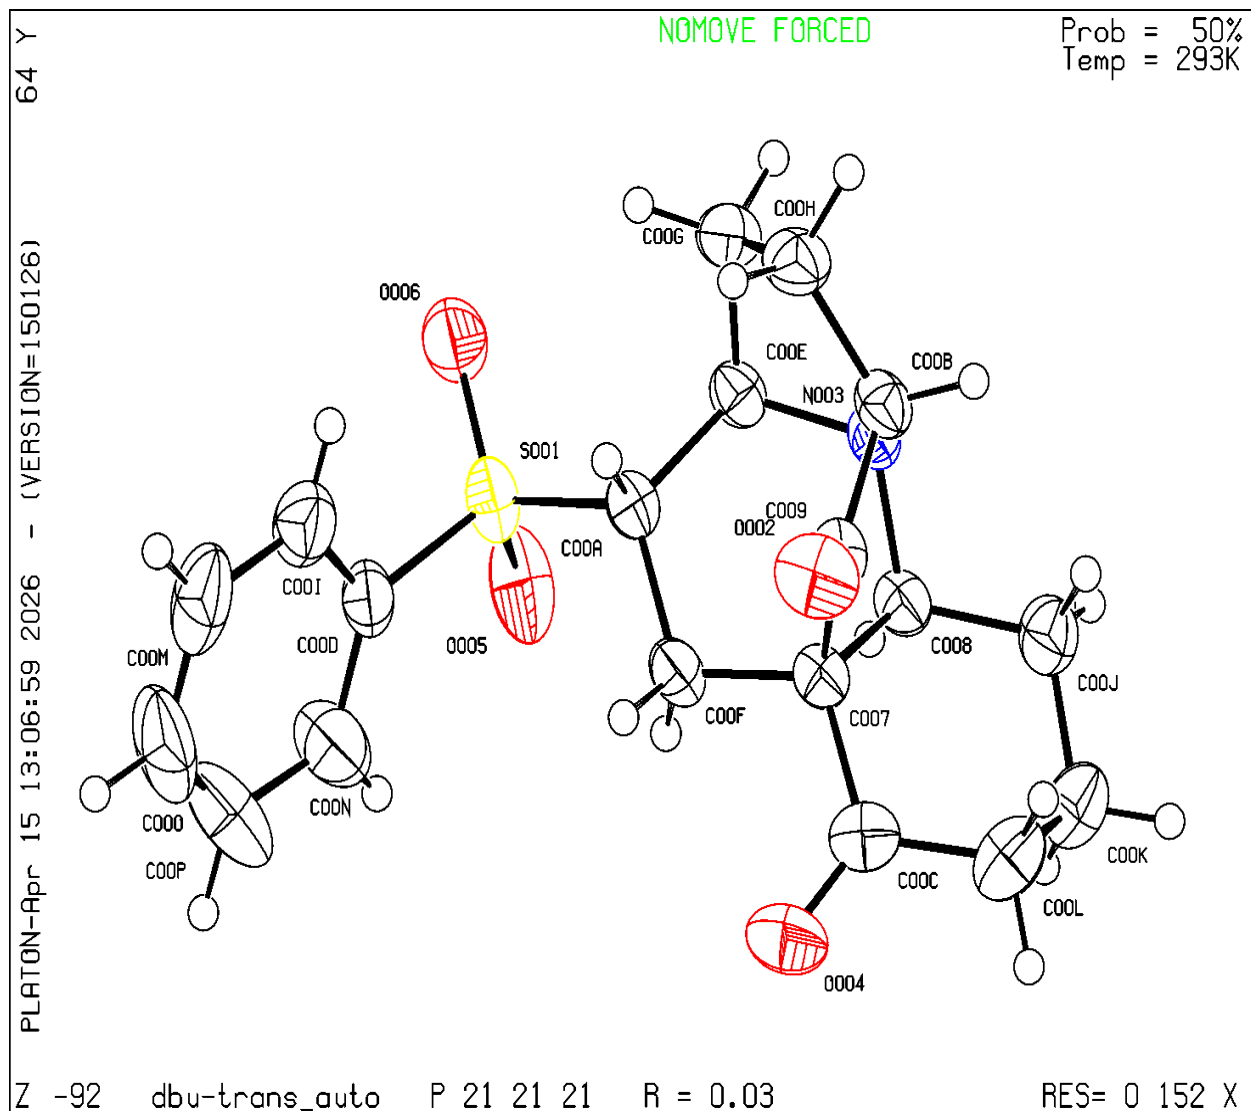

Figure S7. Thermal Ellipsoid are plotted at the 50% probability level

## 5. References

1. D. D. Perrin and W. L. F. Armarego, *Purification of Laboratory Chemicals*, 4th ed.; Butterworth-Heinemann: Oxford, 1996.
2. R. Varkhedkar, S. Dogra, D. Tiwari, Y. Hussain, P. N. Yadav and G. Pandey, *ChemMedChem* 2018, **13**, 384–395.
3. (a) E. Moreno-Clavijo, A. J. Moreno-Vargas, R. Kieffer, T. Sigstam, A. T. Carmona and I. Robina, *Org. Lett.* 2011, **13**, 6244–6247. (b) G. Pandey, R. Varkhedkar and D. Tiwari, *Org. Biomol. Chem.* 2015, **13**, 4438–4448.

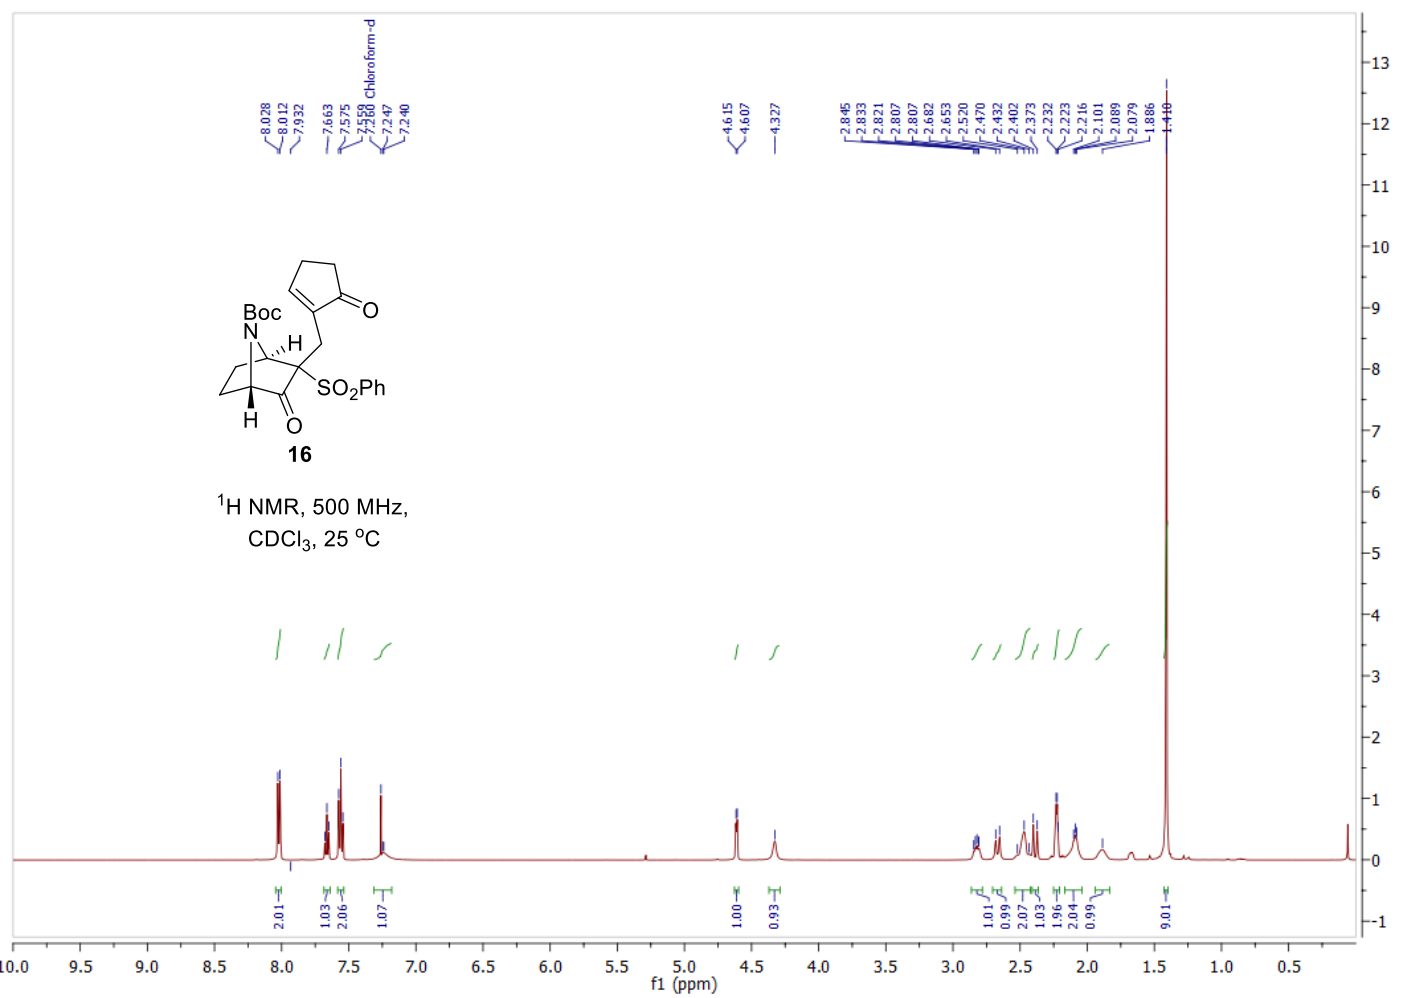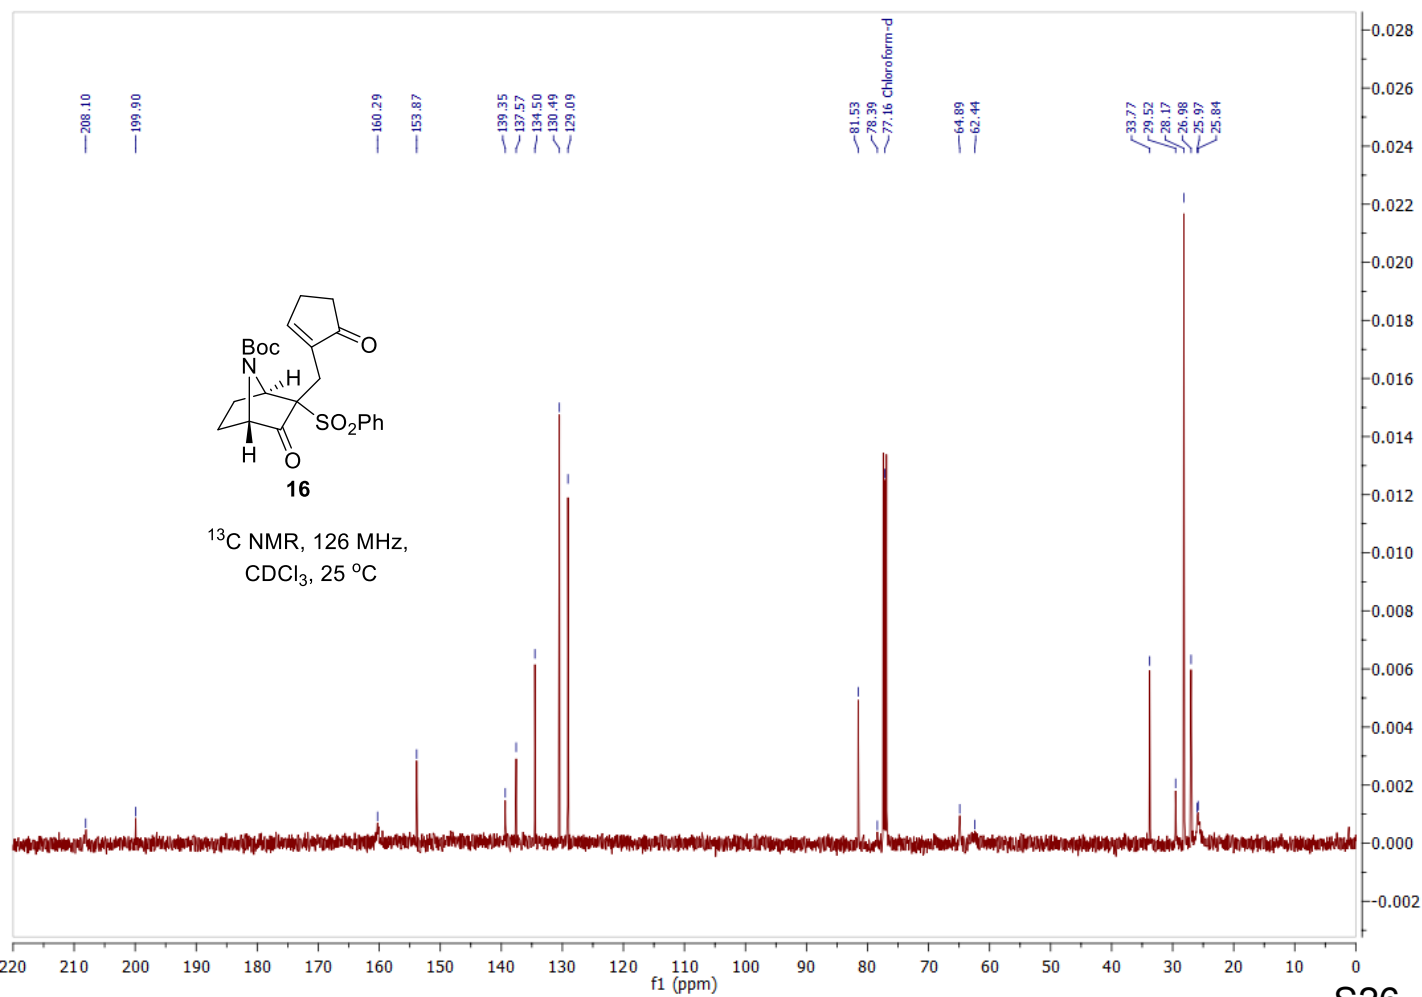

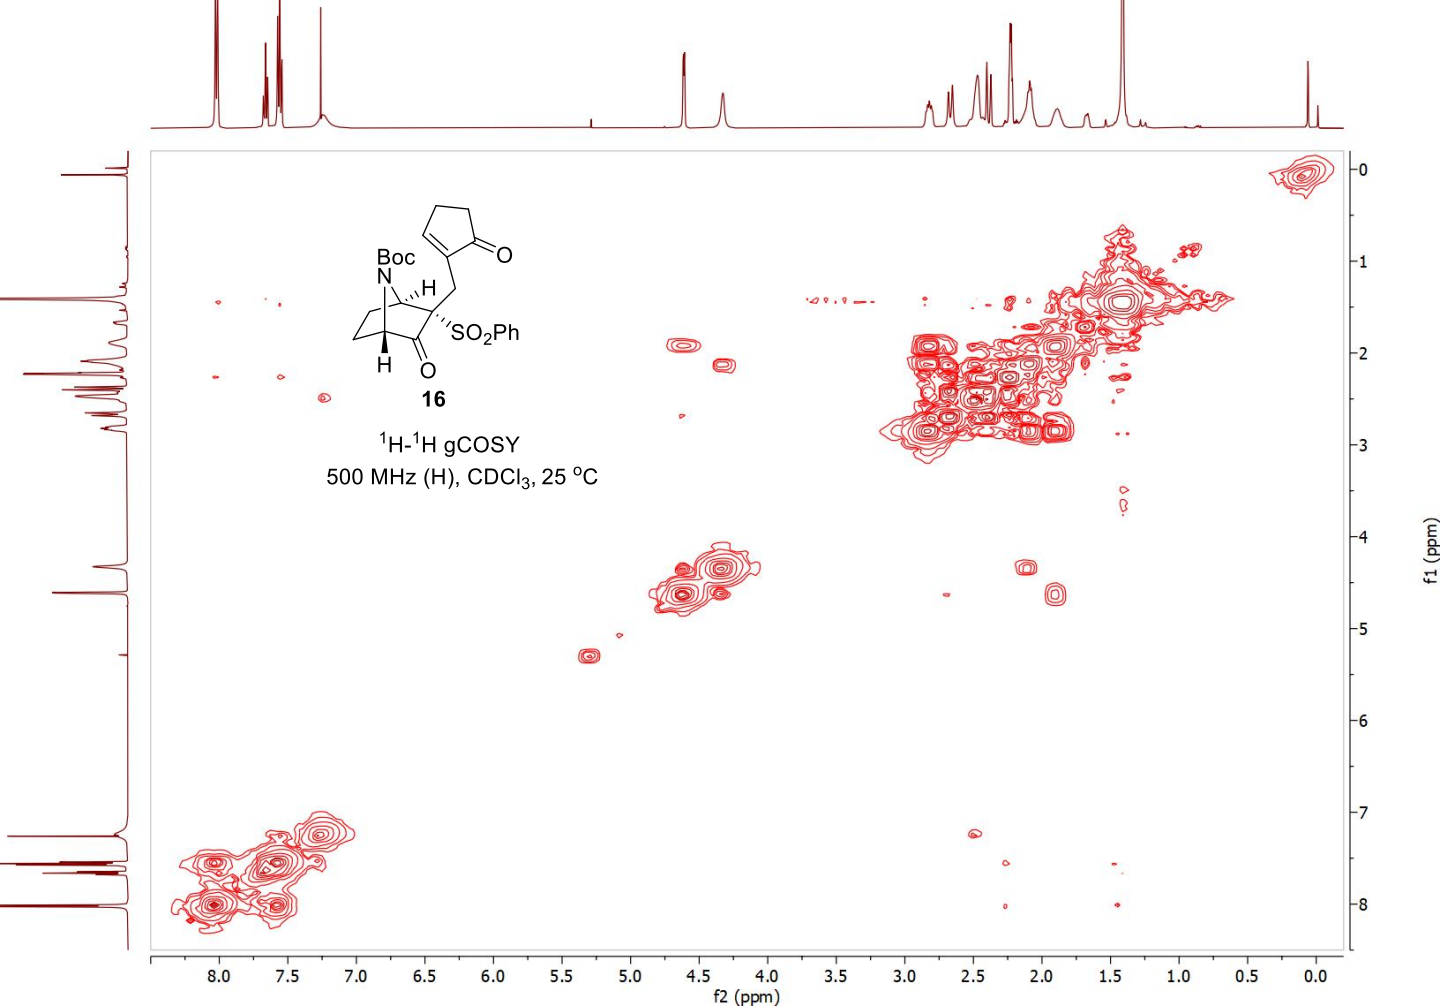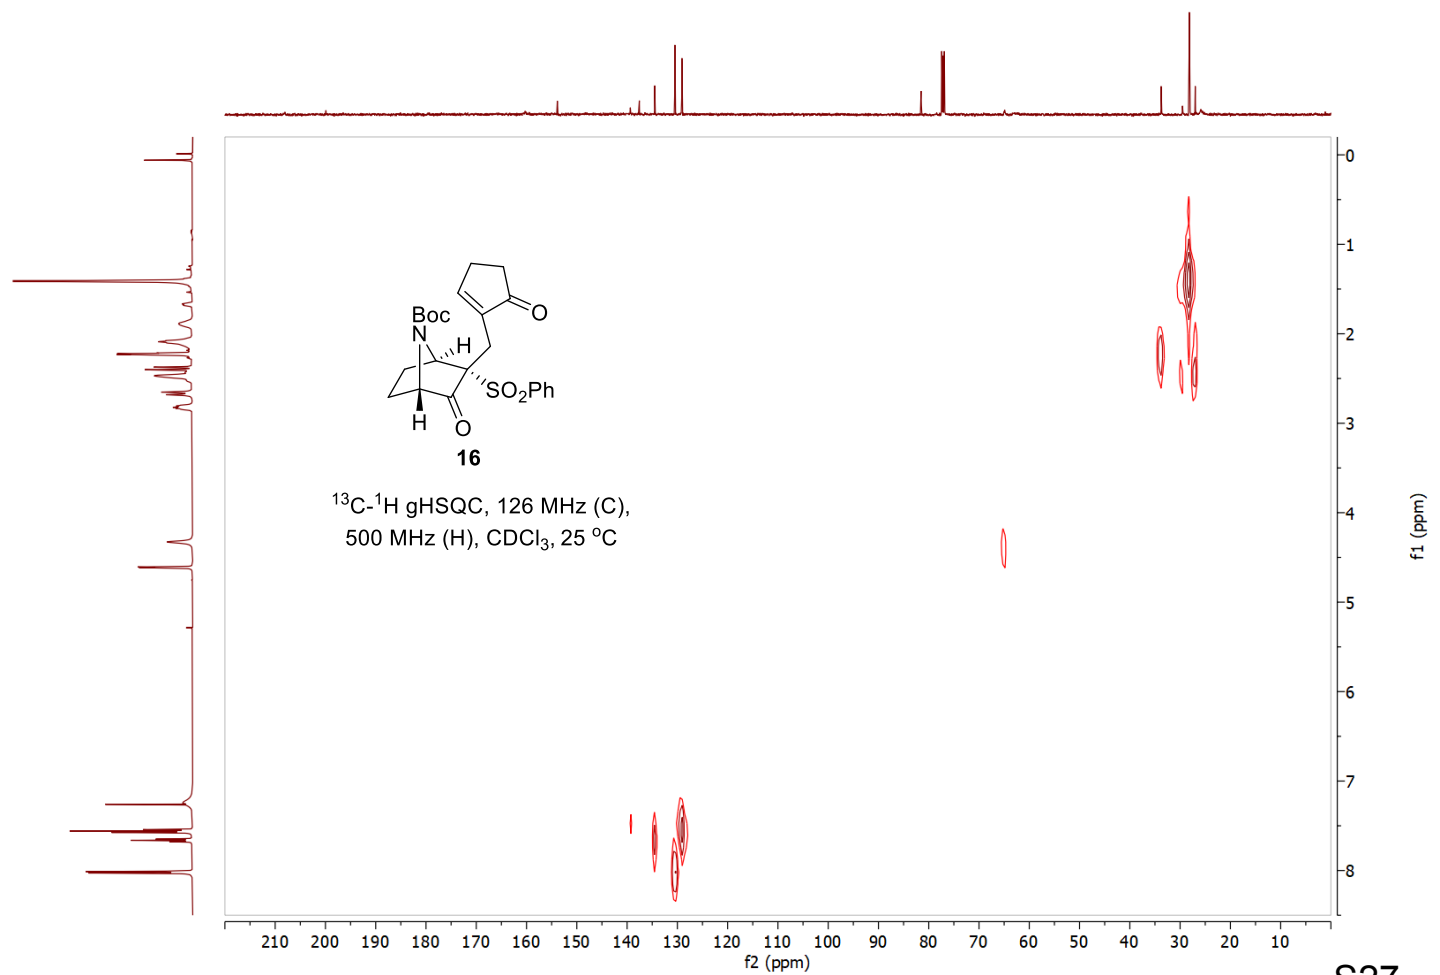

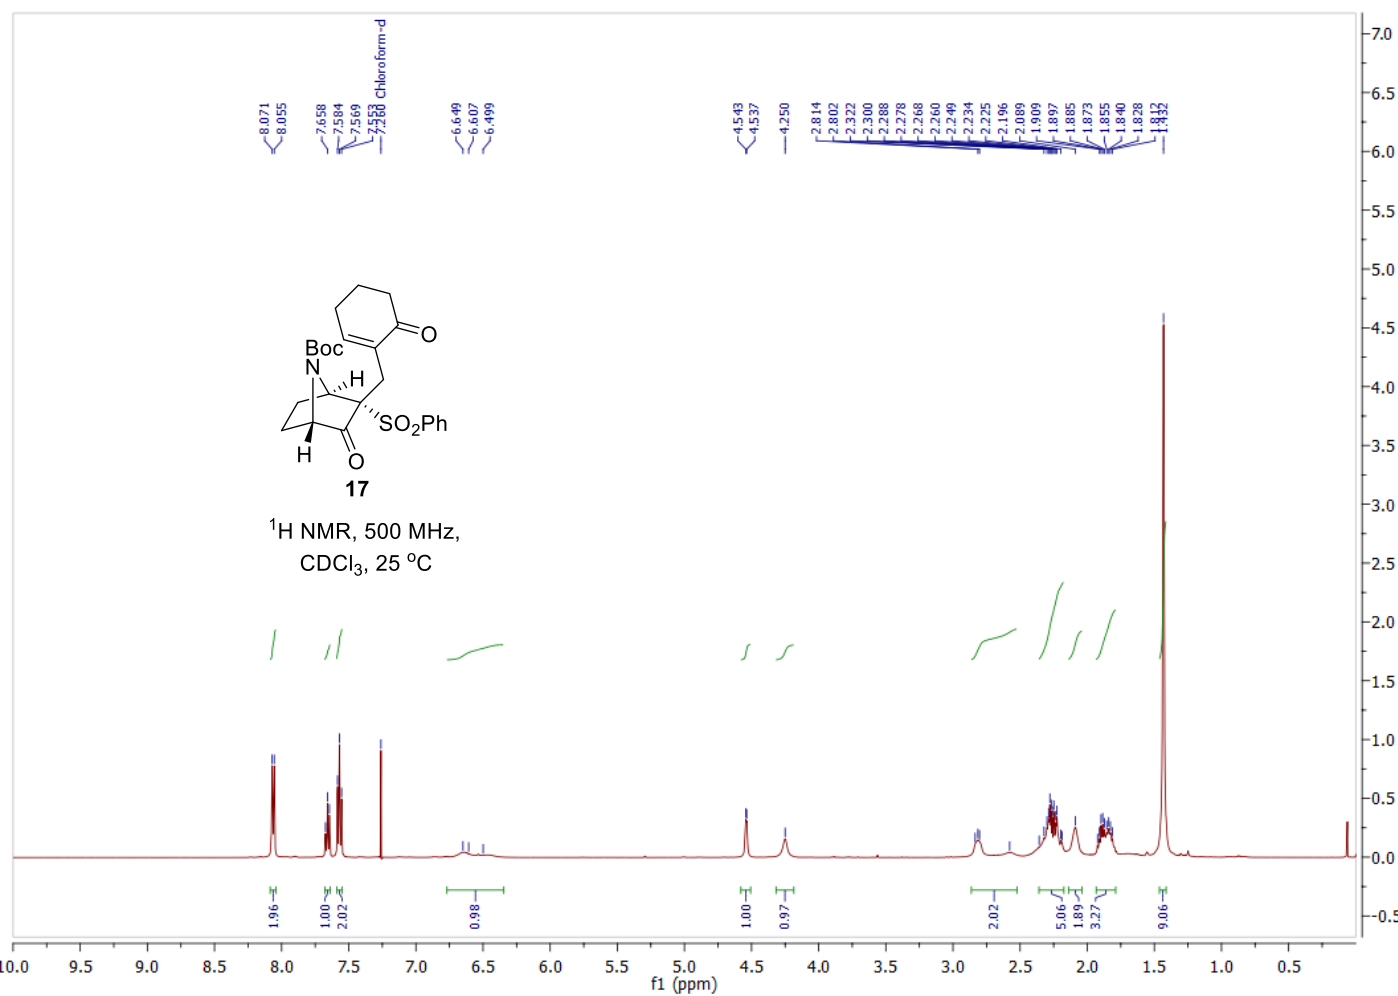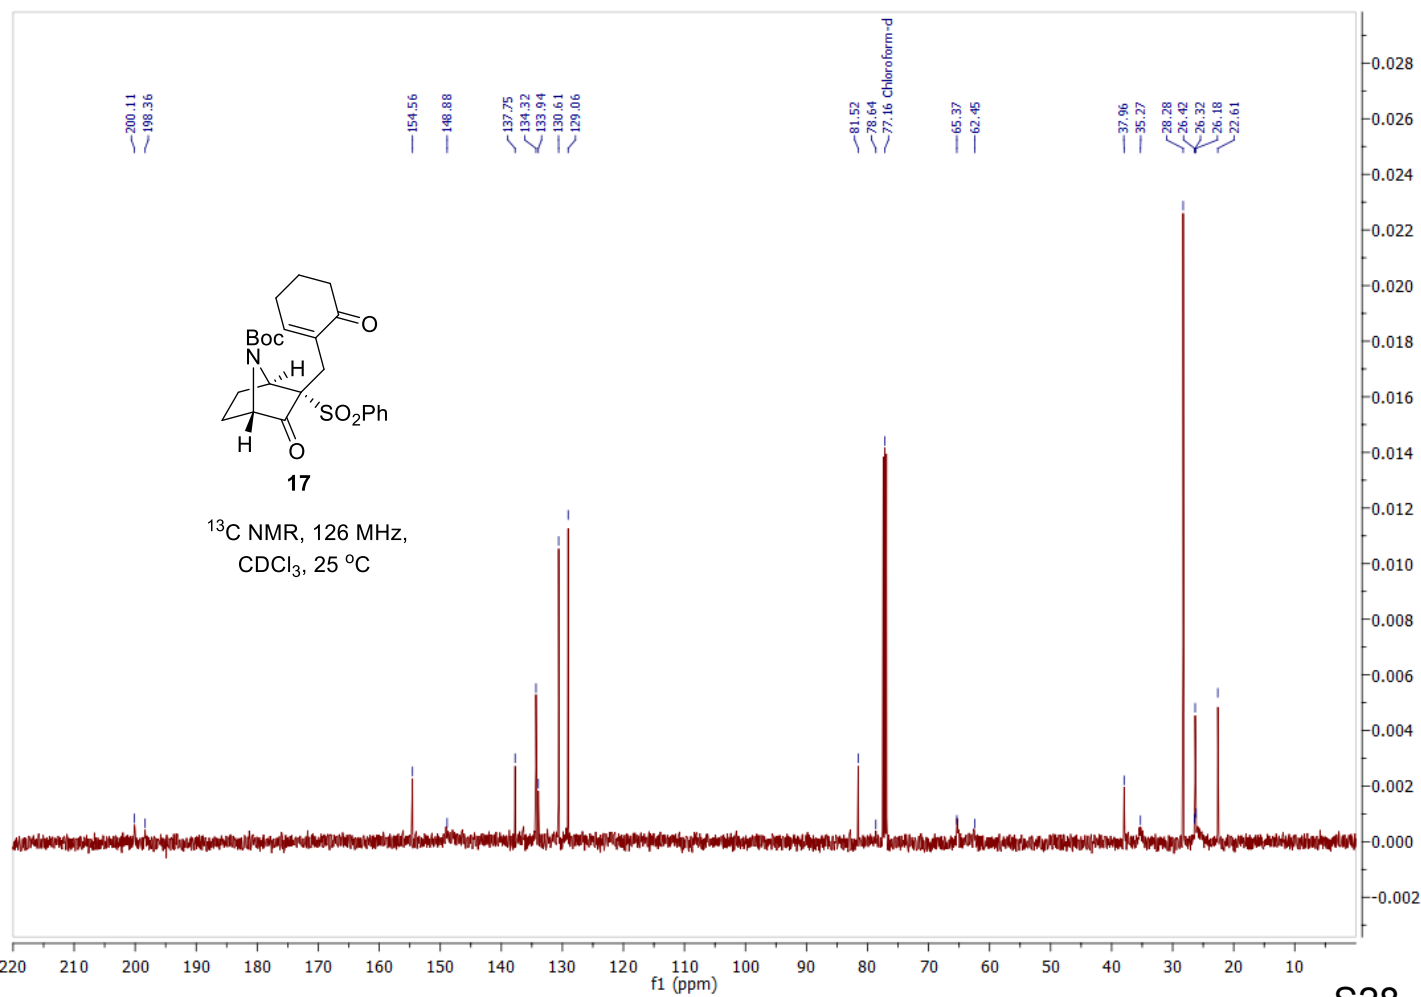

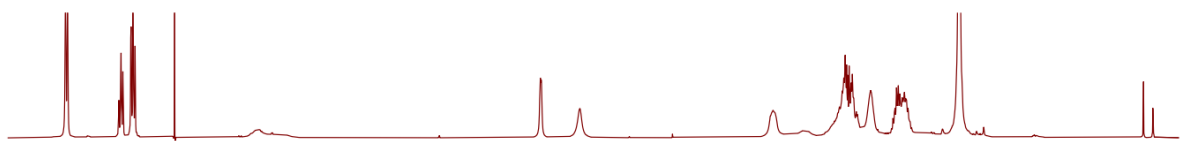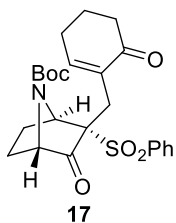

$^1\text{H}$ - $^1\text{H}$  gCOSY,  
500 MHz (H),  $\text{CDCl}_3$ , 25 °C

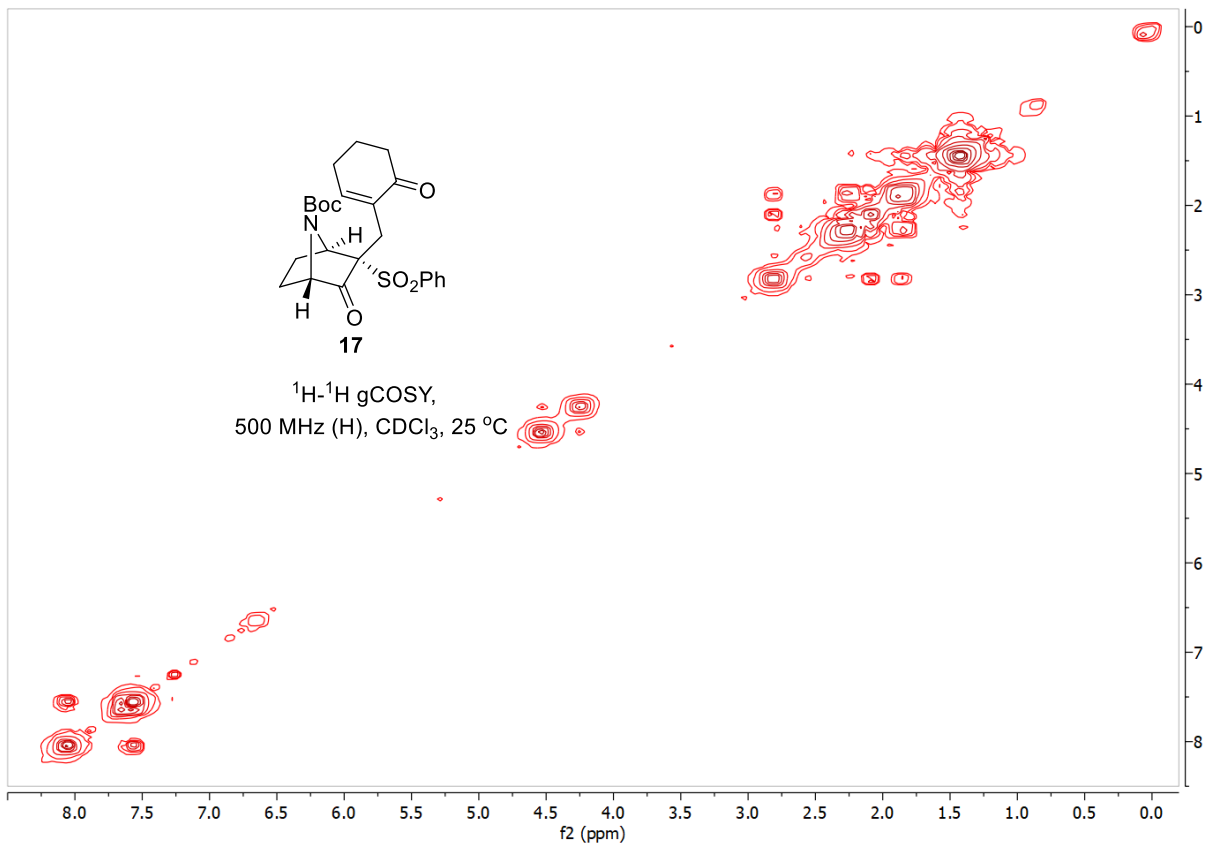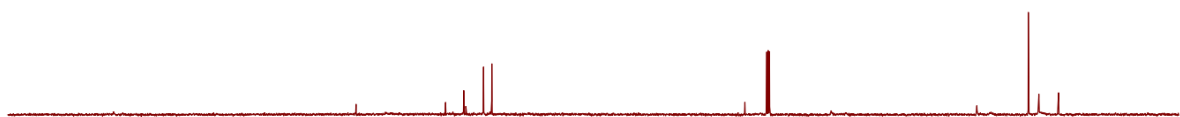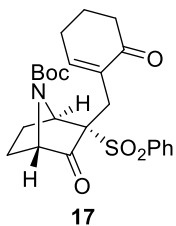

$^{13}\text{C}$ - $^1\text{H}$  gHSQC,  
126 MHz (C),  
500 MHz (H),  $\text{CDCl}_3$ , 25 °C

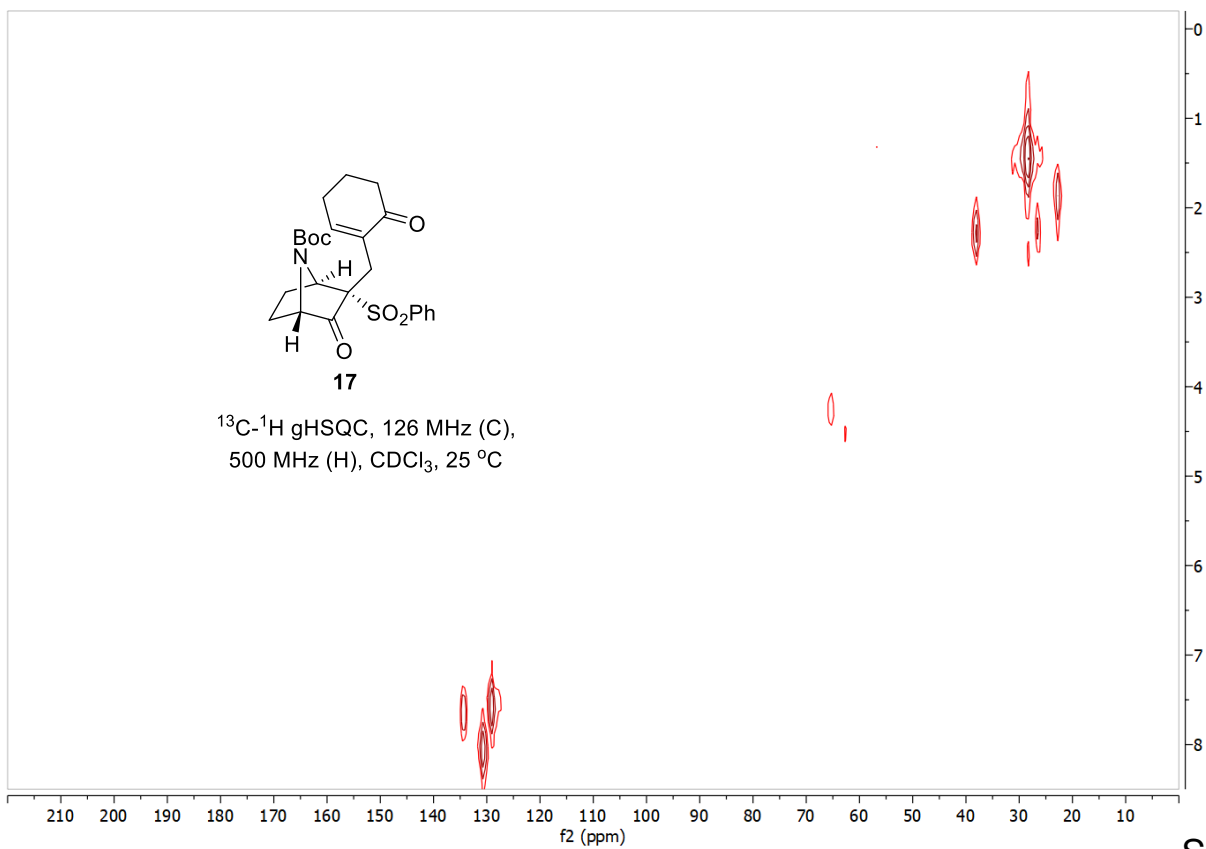

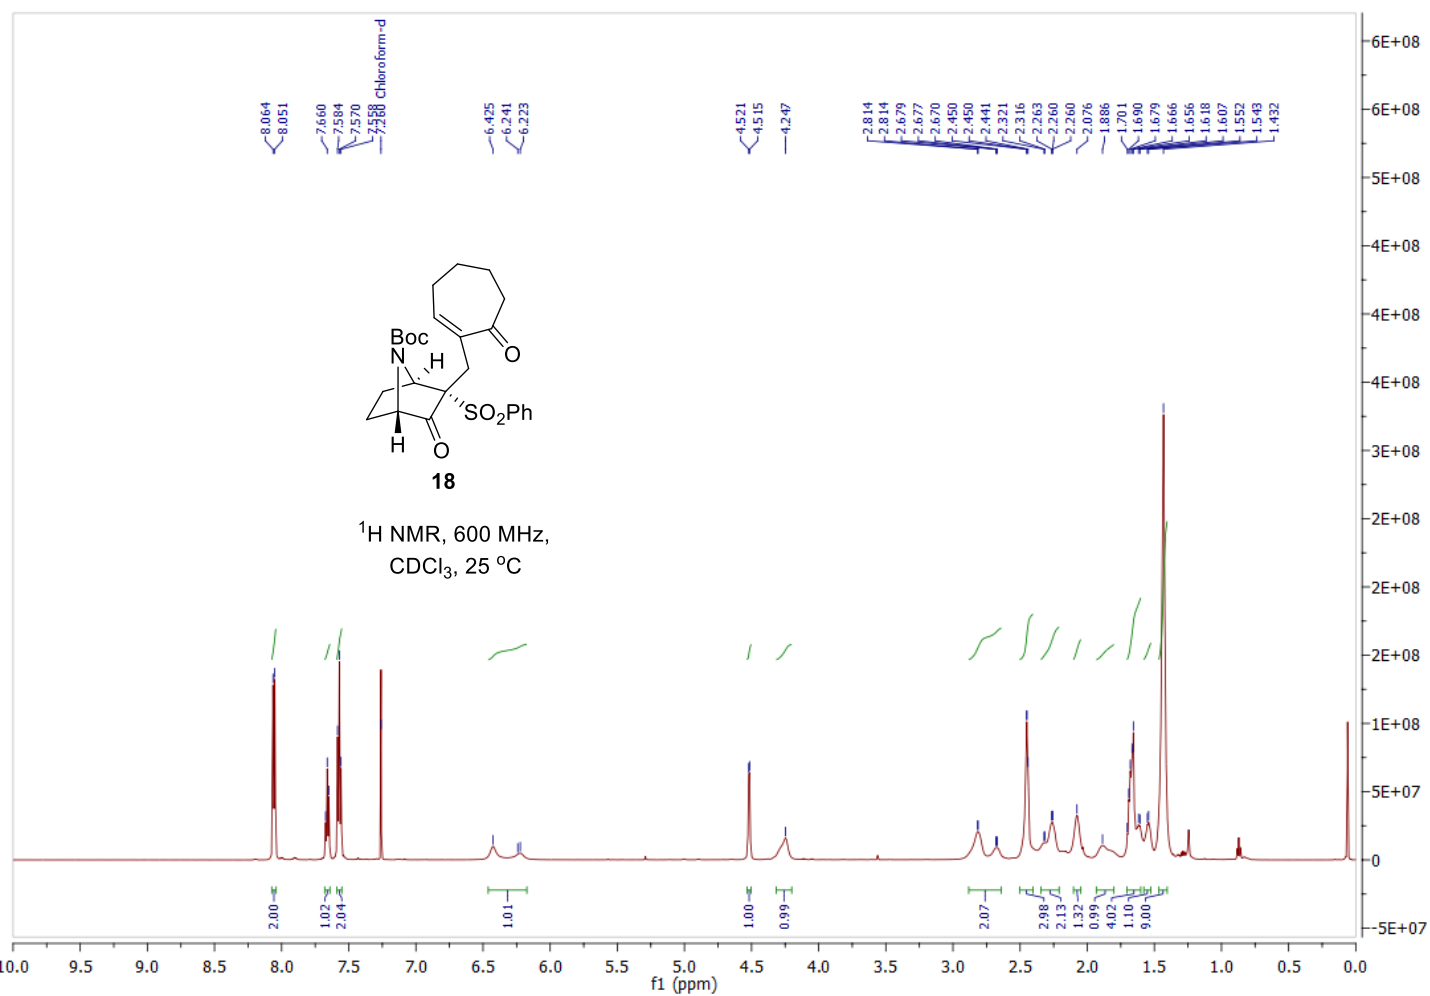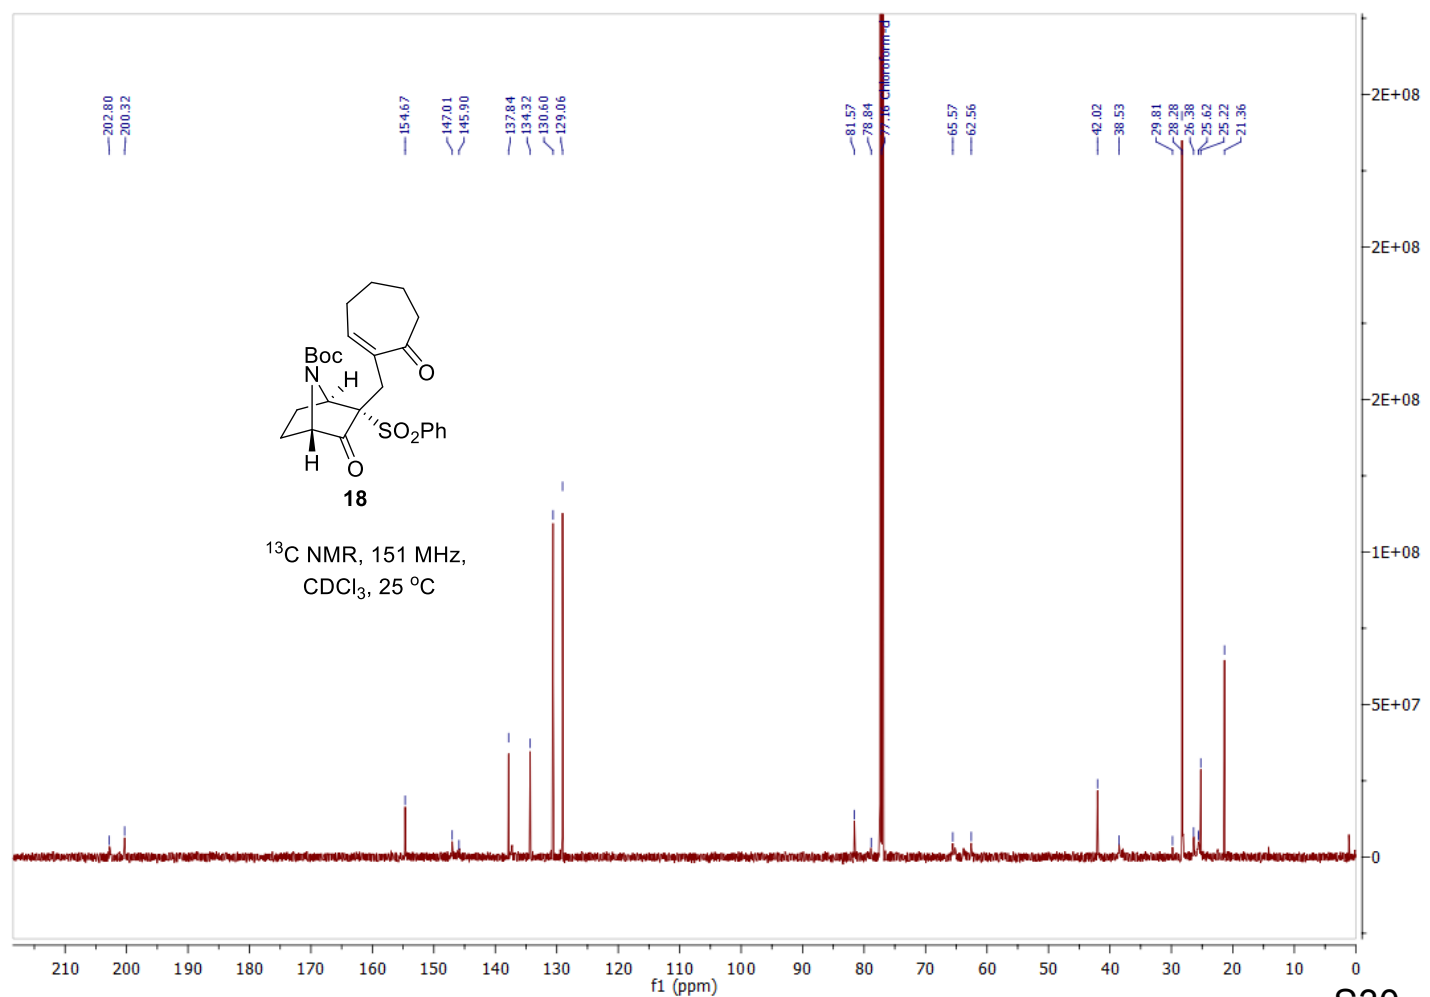

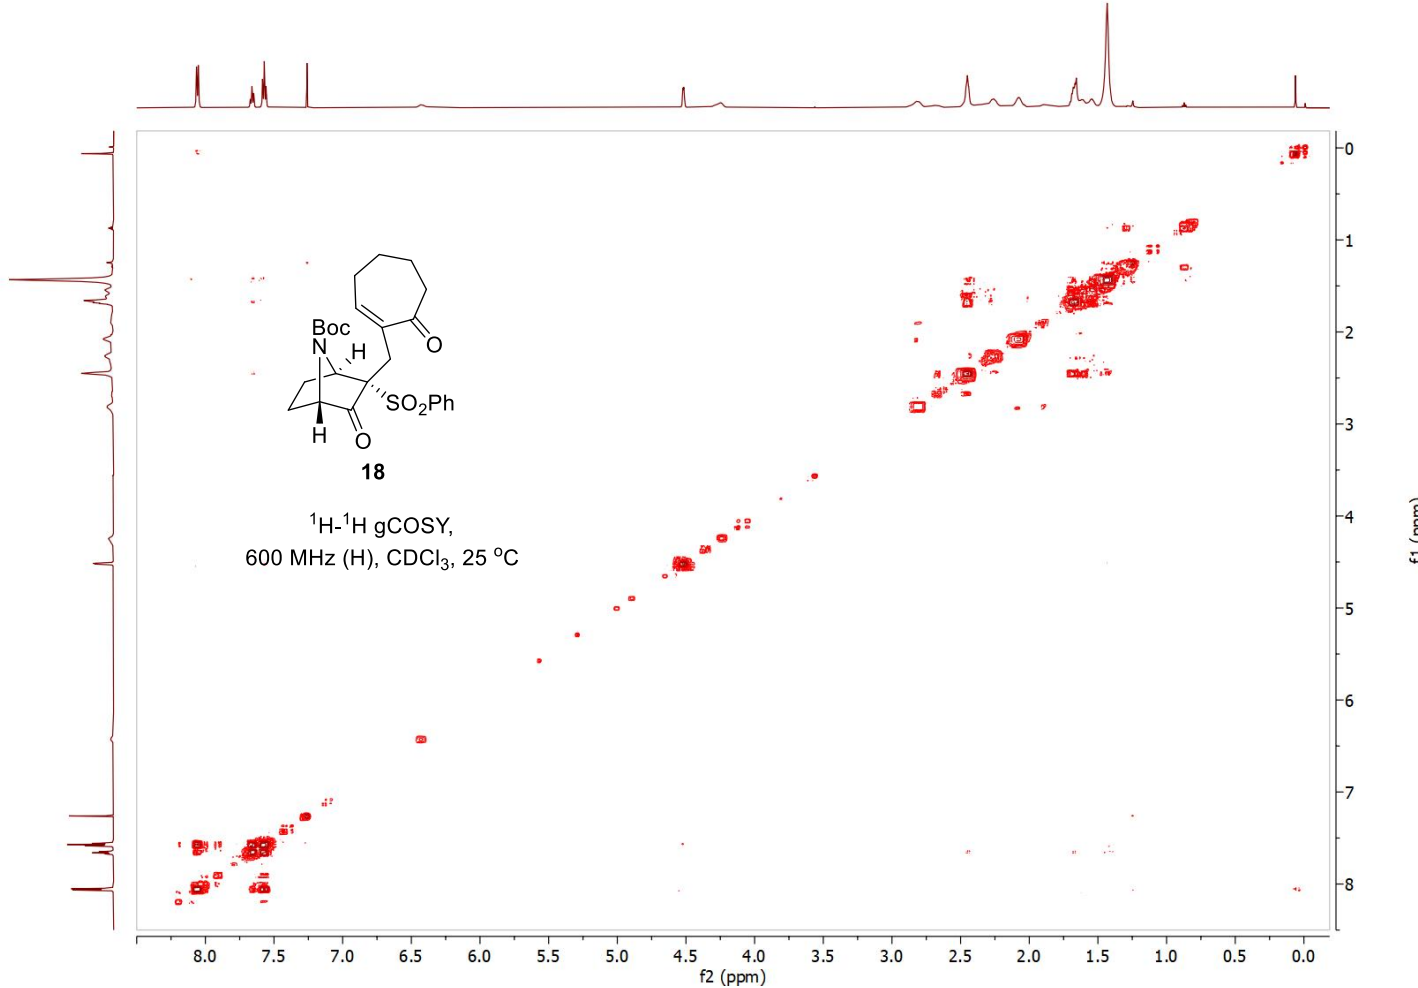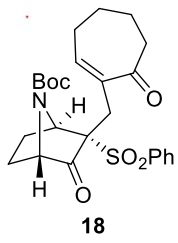

$^1\text{H}$ - $^1\text{H}$  gCOSY,  
600 MHz (H),  $\text{CDCl}_3$ , 25 °C

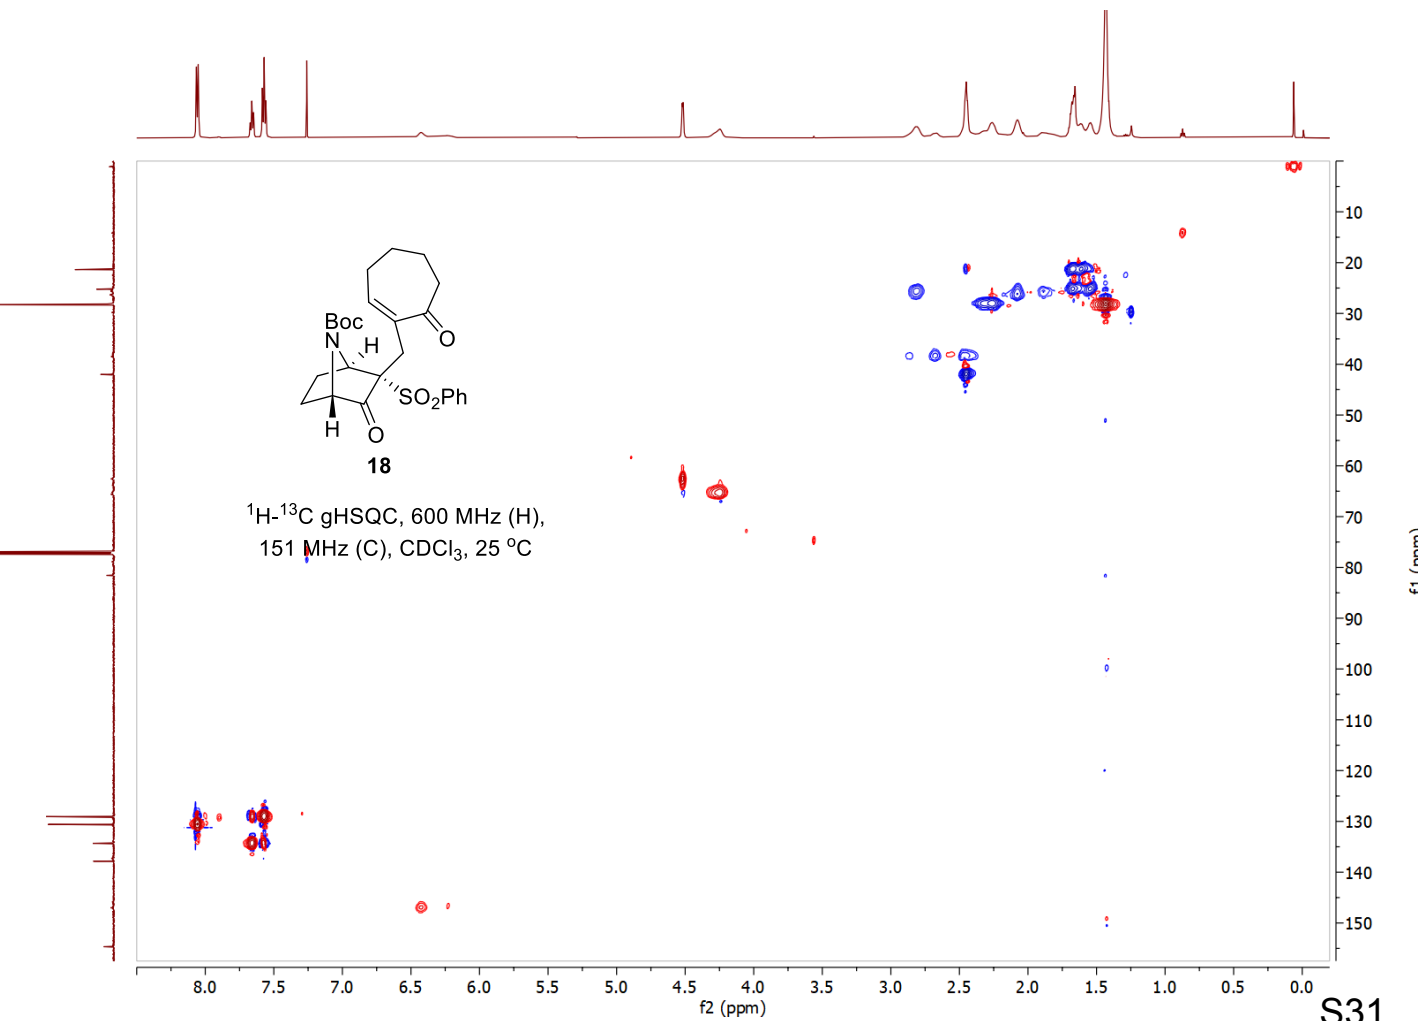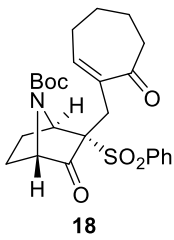

$^1\text{H}$ - $^{13}\text{C}$  gHSQC, 600 MHz (H),  
151 MHz (C),  $\text{CDCl}_3$ , 25 °C

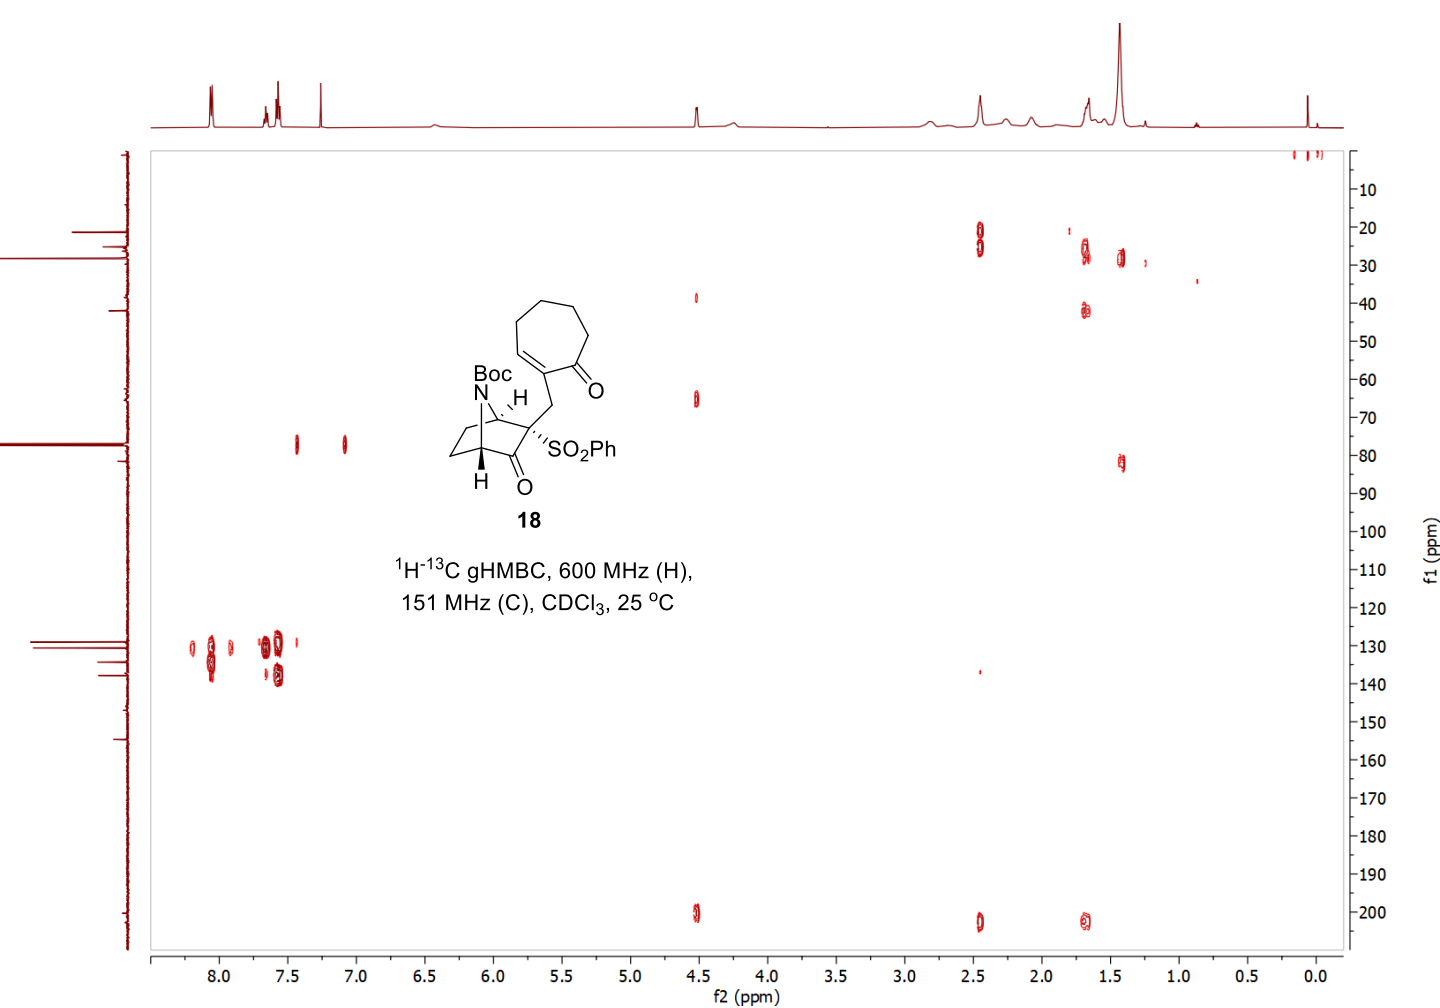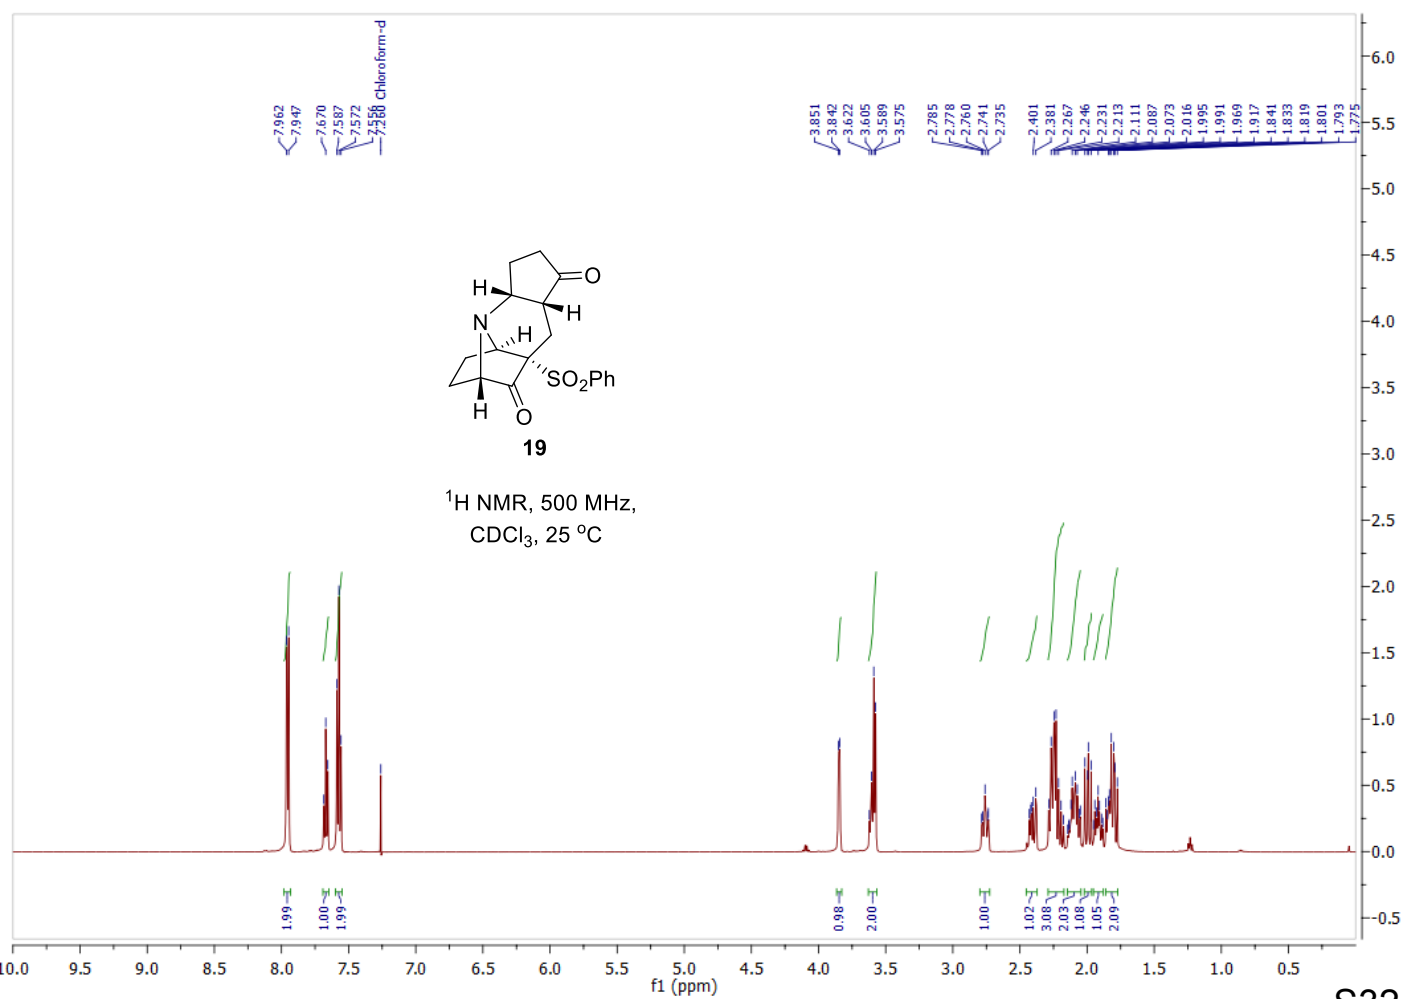

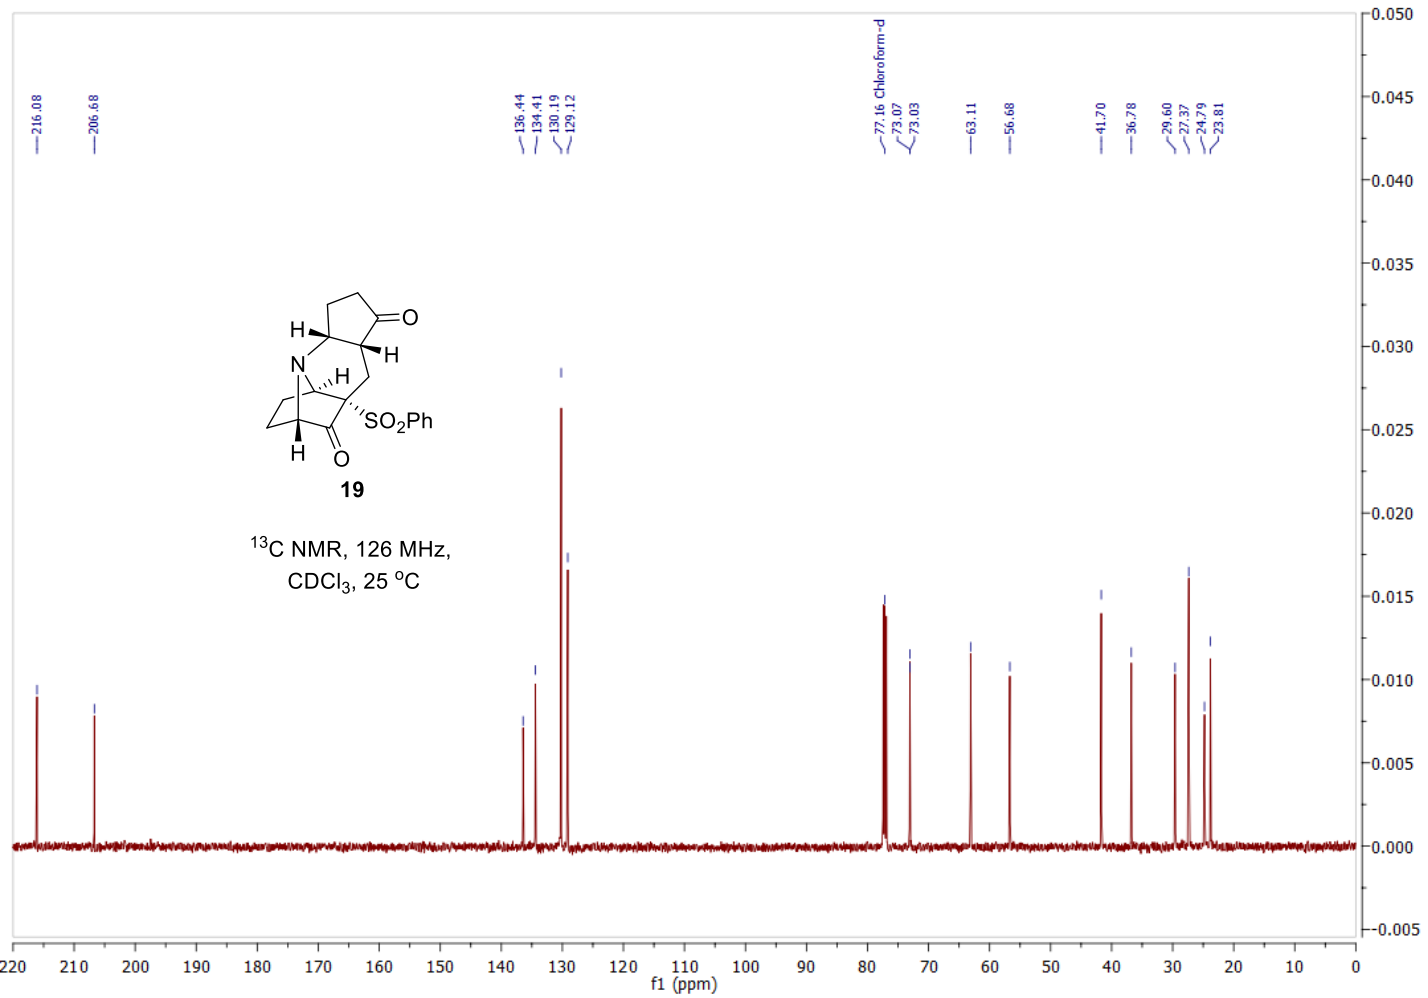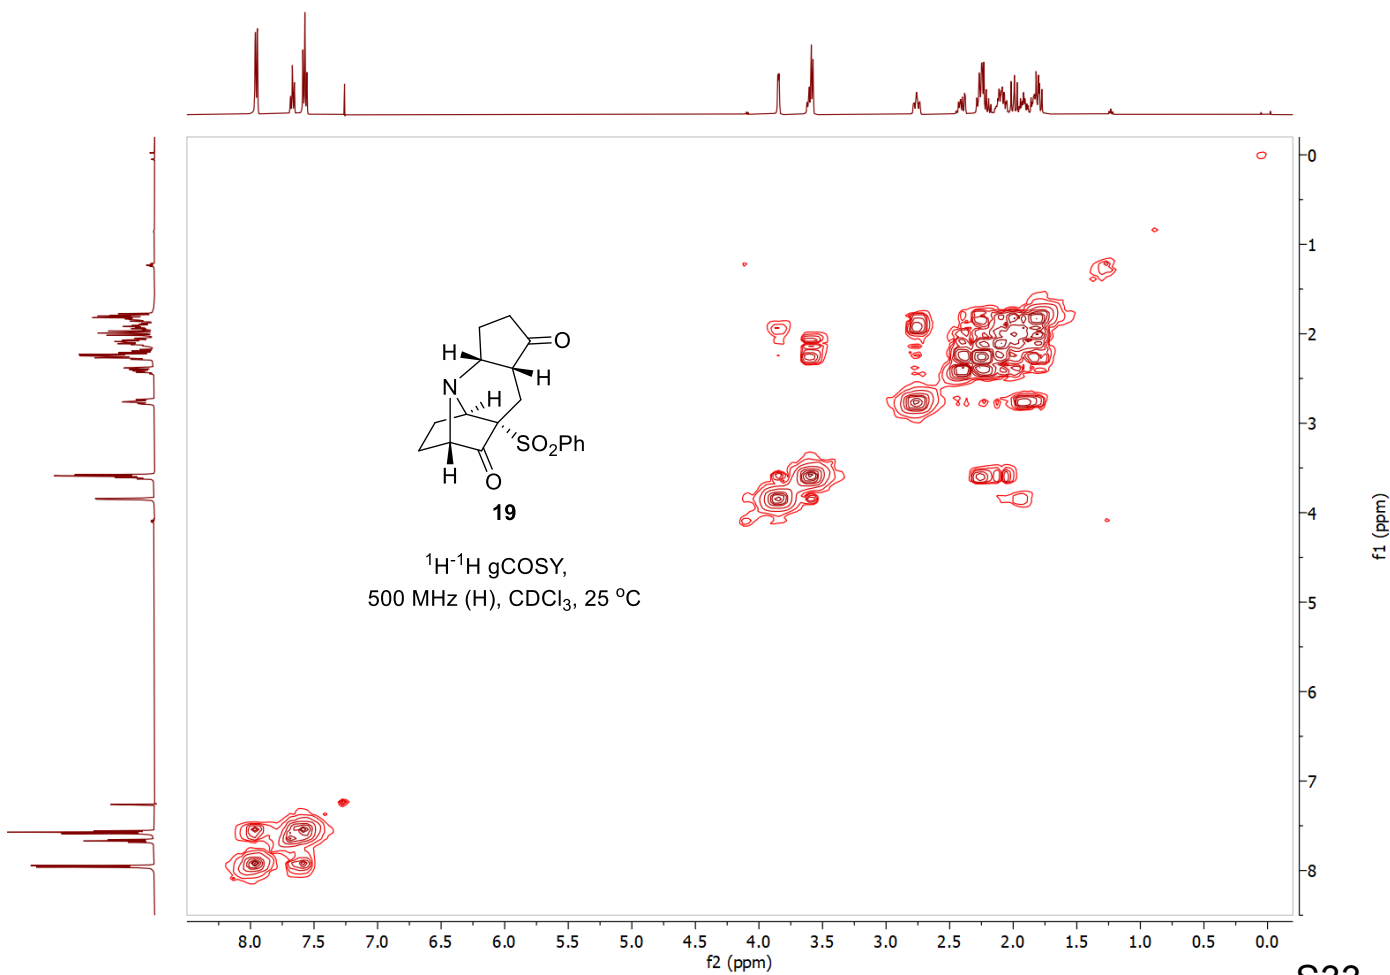

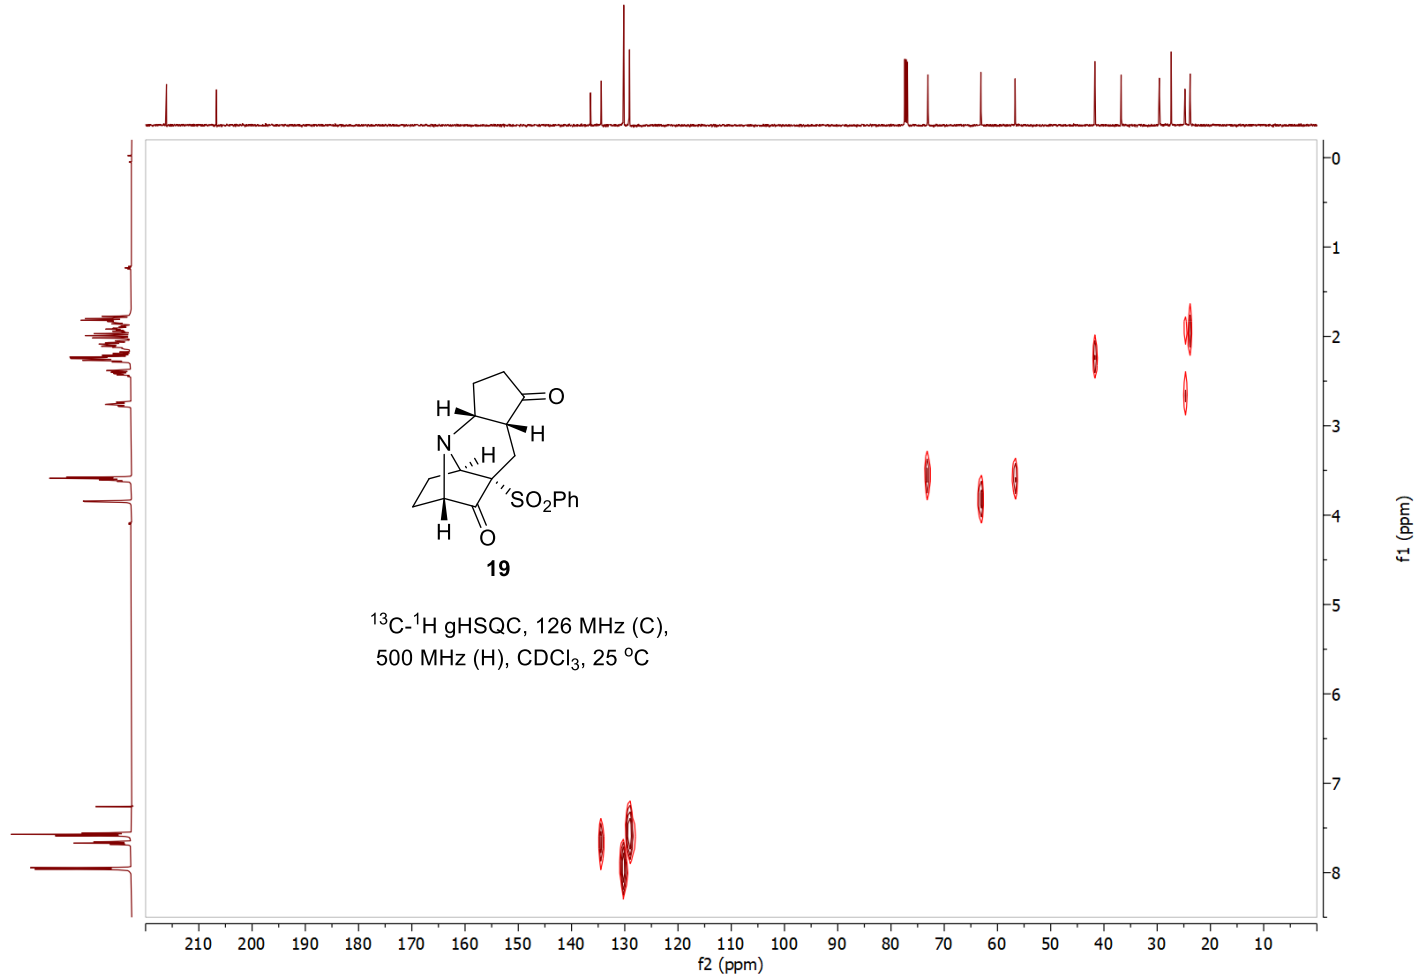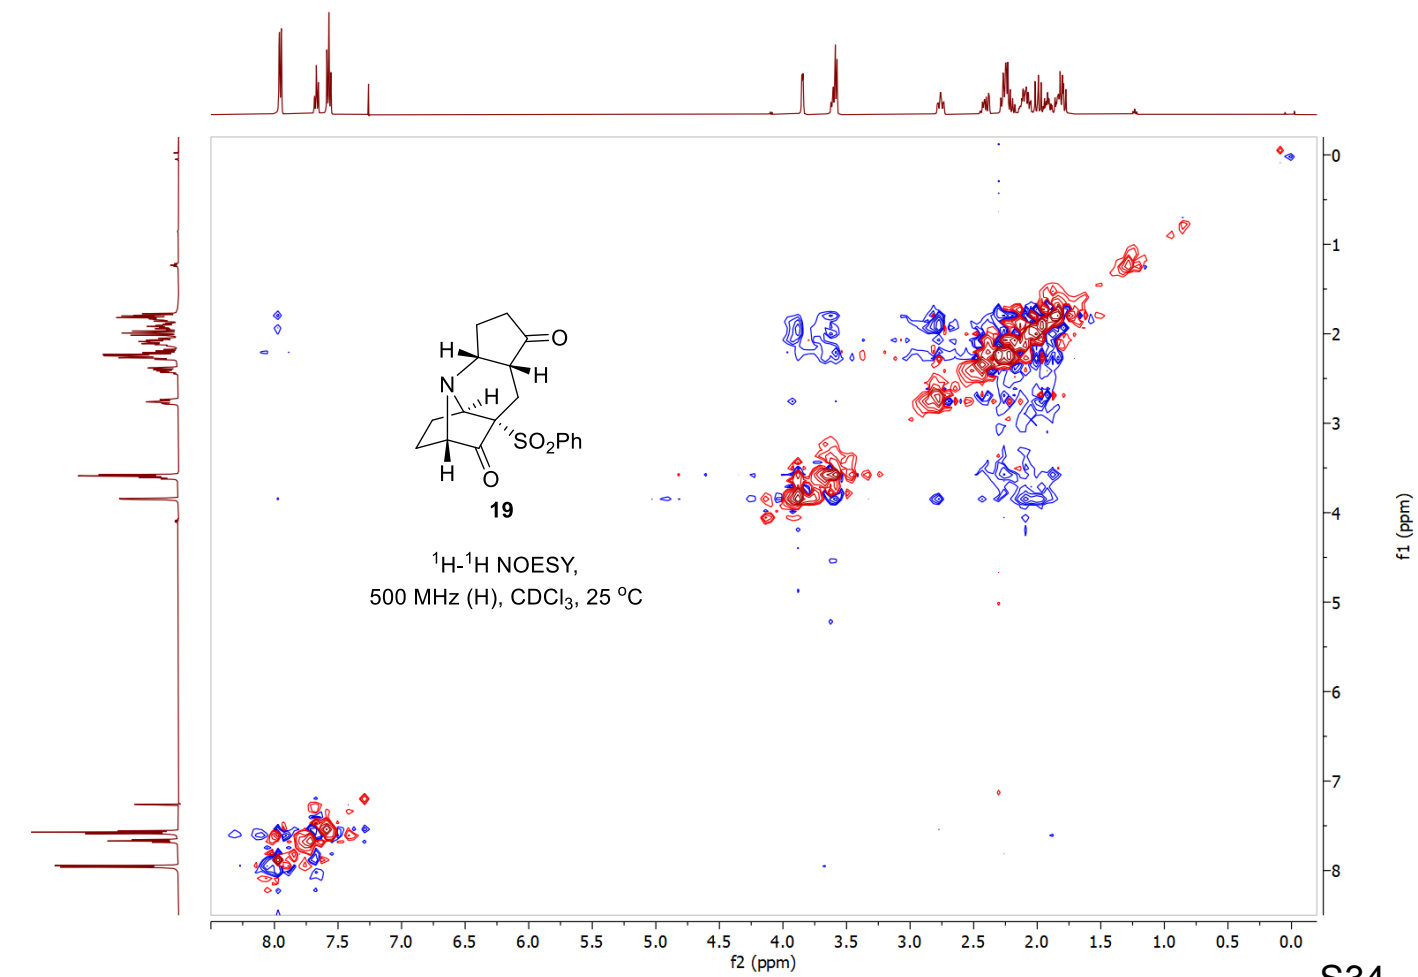

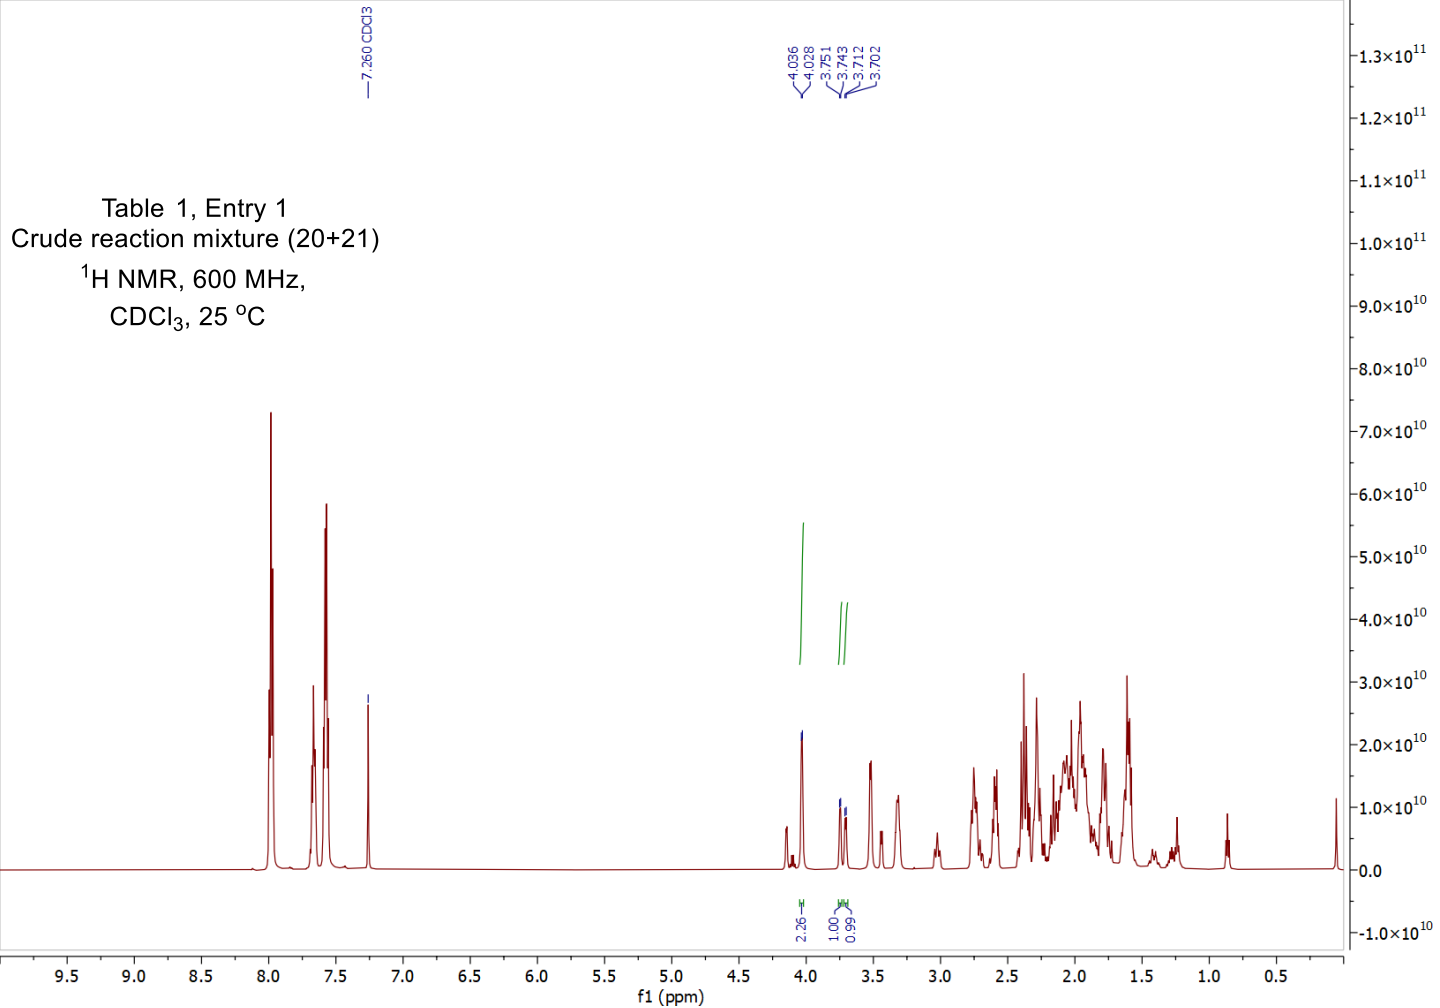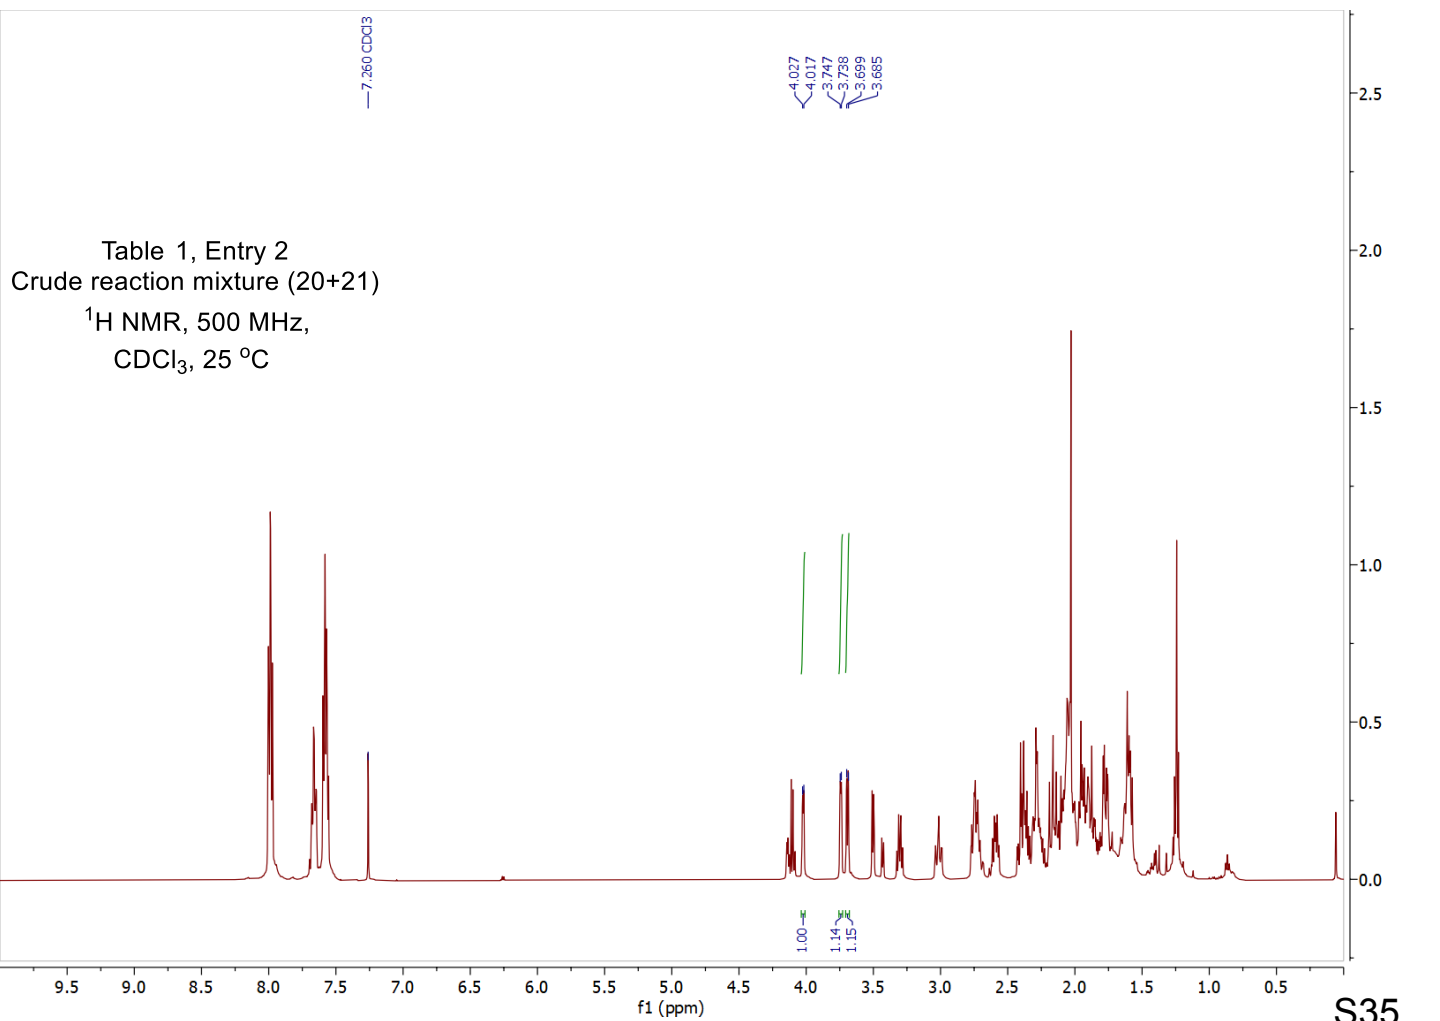

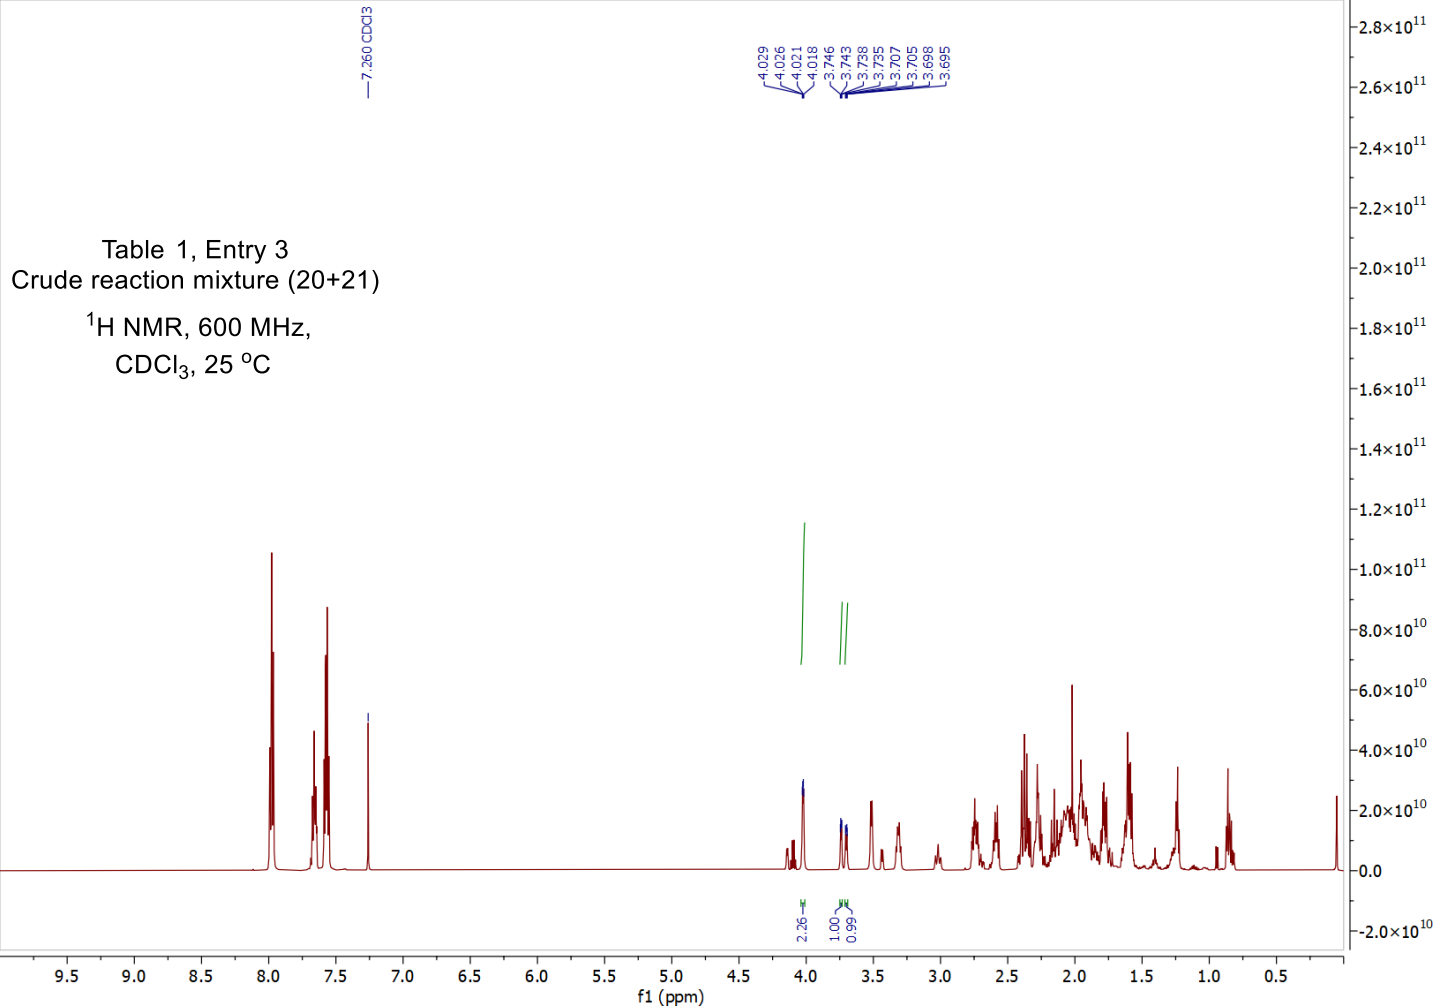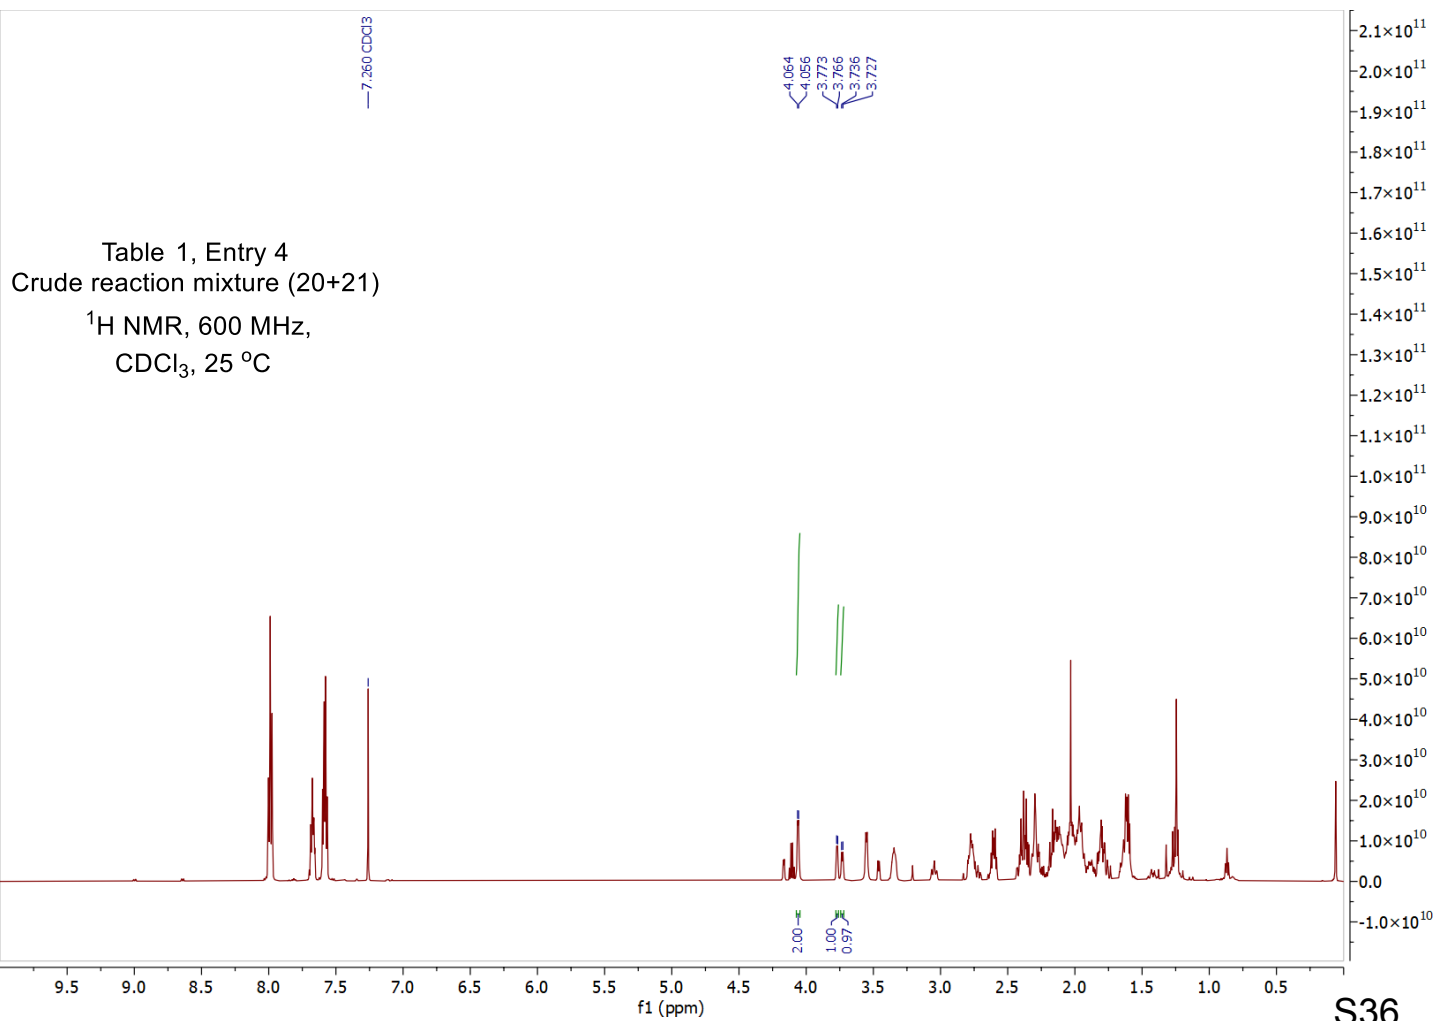

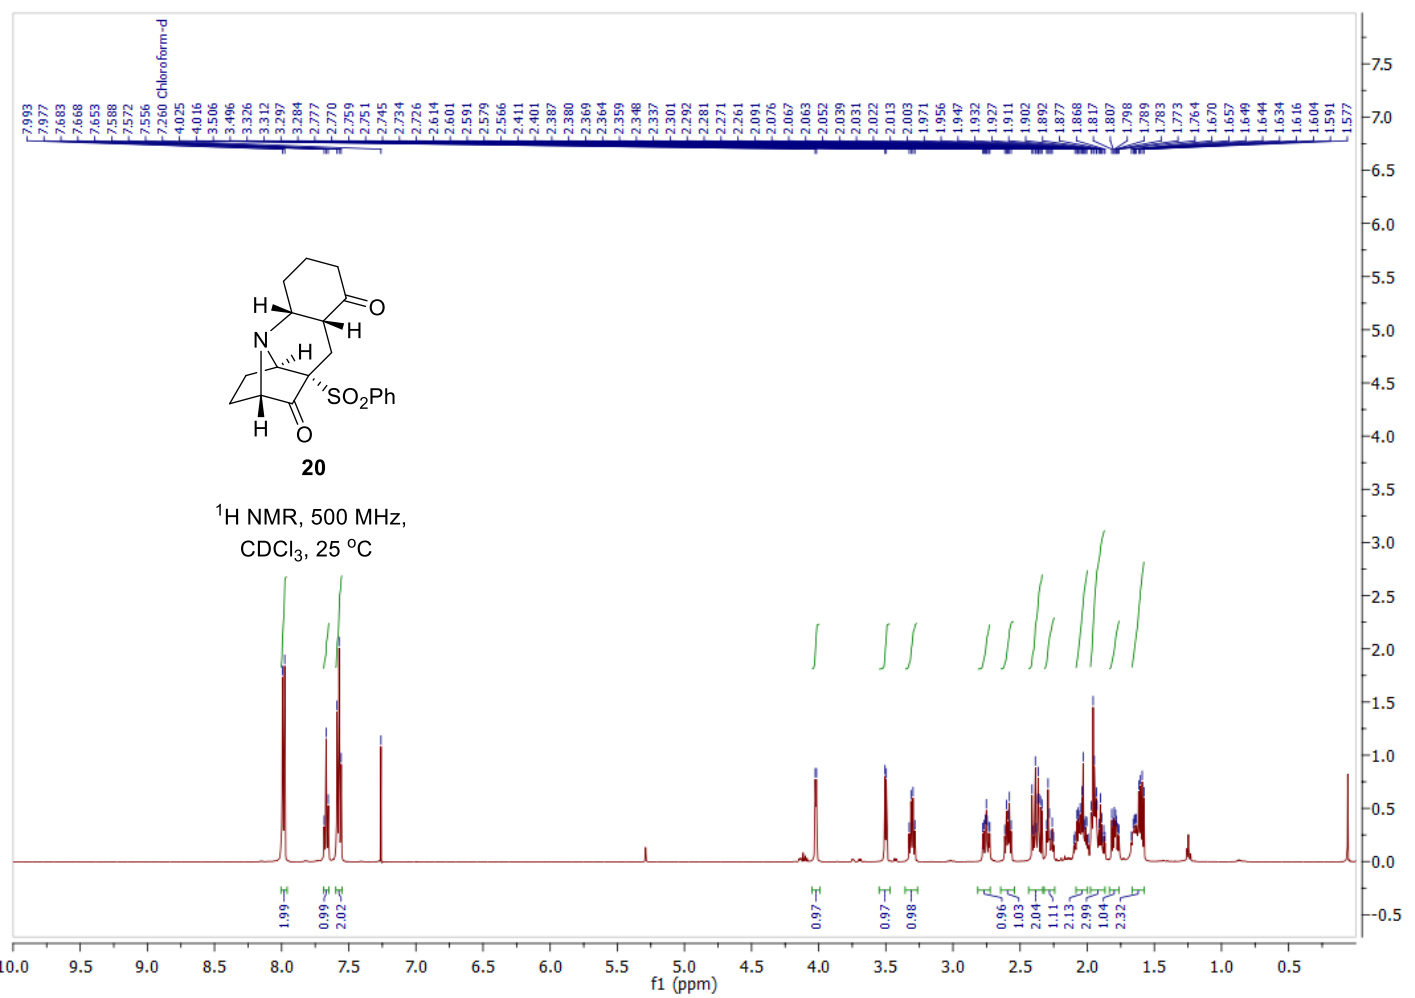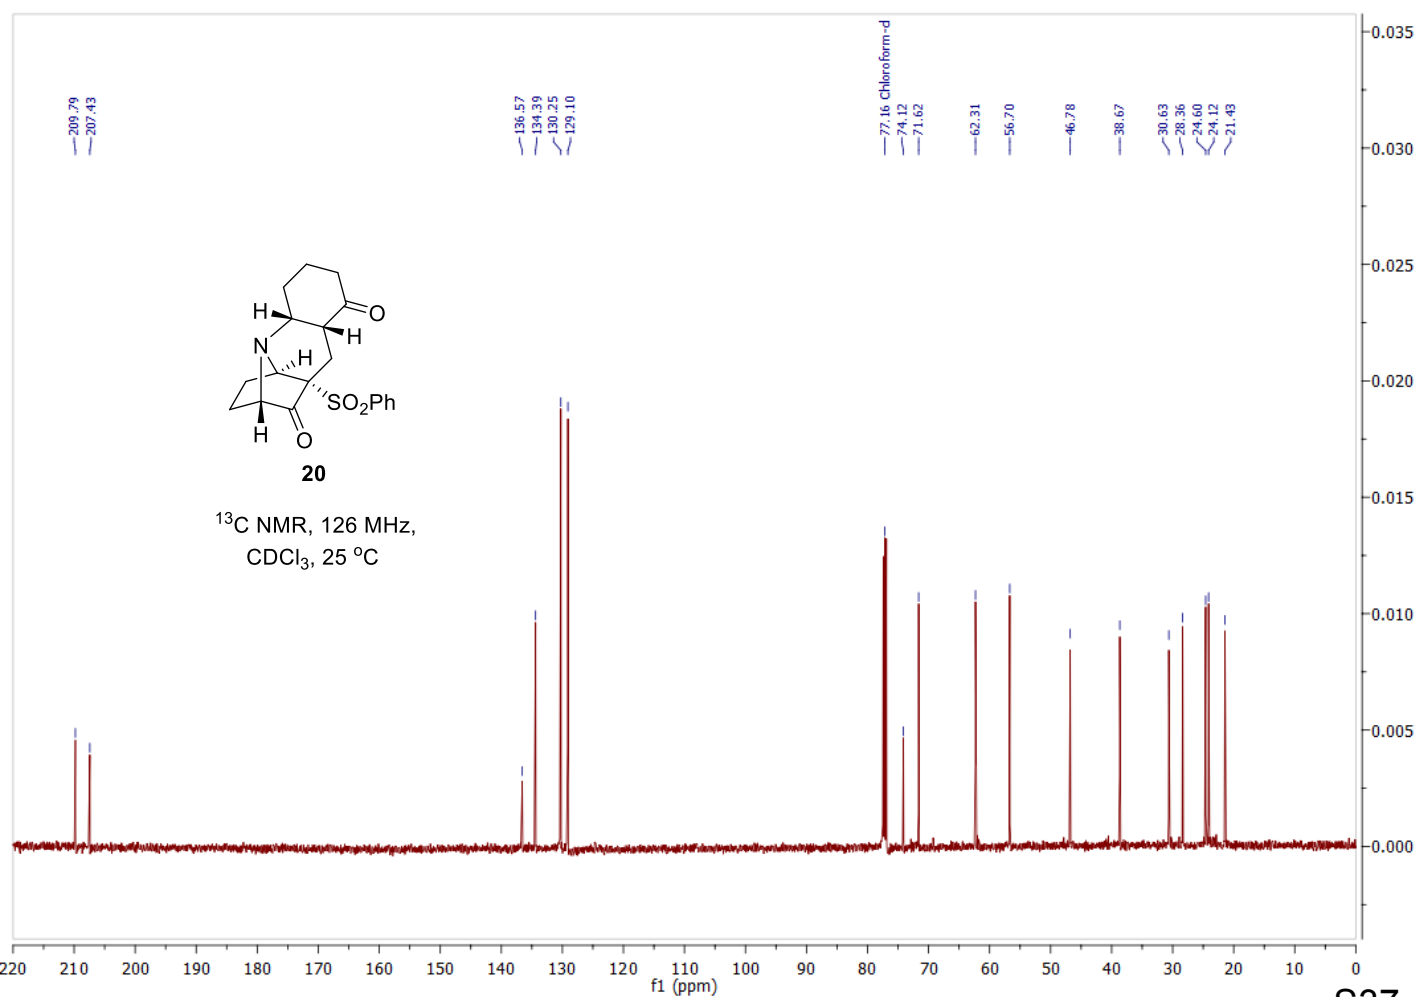

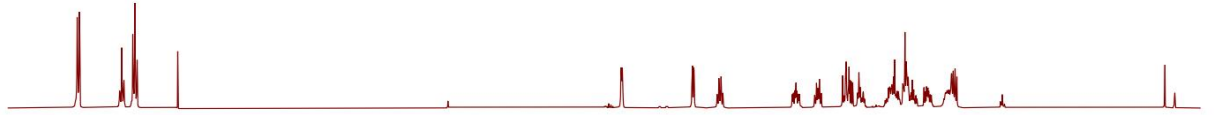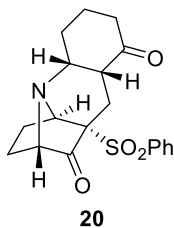

<sup>1</sup>H-<sup>1</sup>H gCOSY,  
500 MHz (H), CDCl<sub>3</sub>, 25 °C

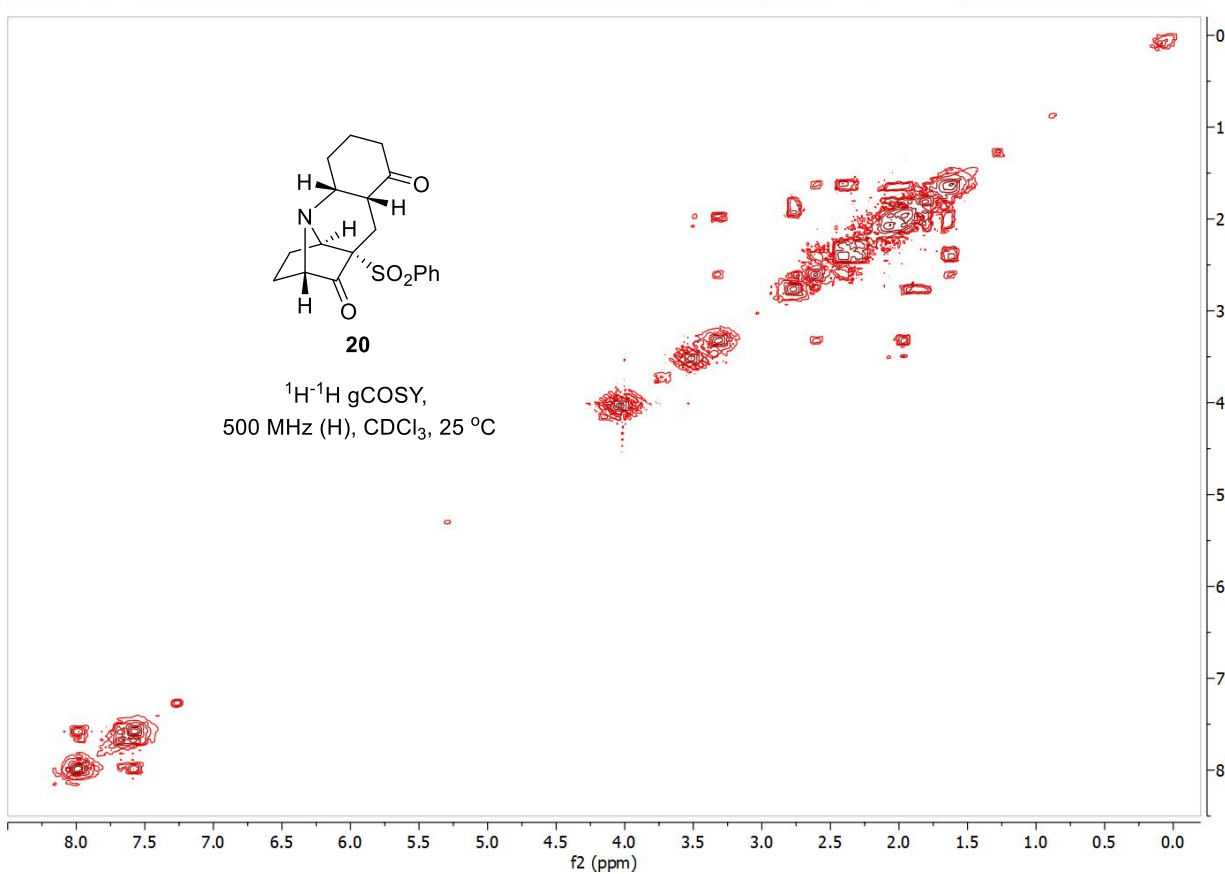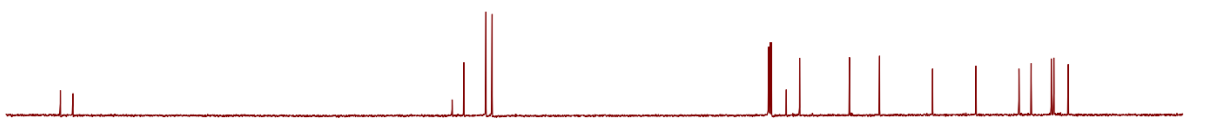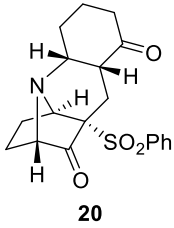

<sup>13</sup>C-<sup>1</sup>H gHSQC, 126 MHz (C),  
500 MHz (H), CDCl<sub>3</sub>, 25 °C

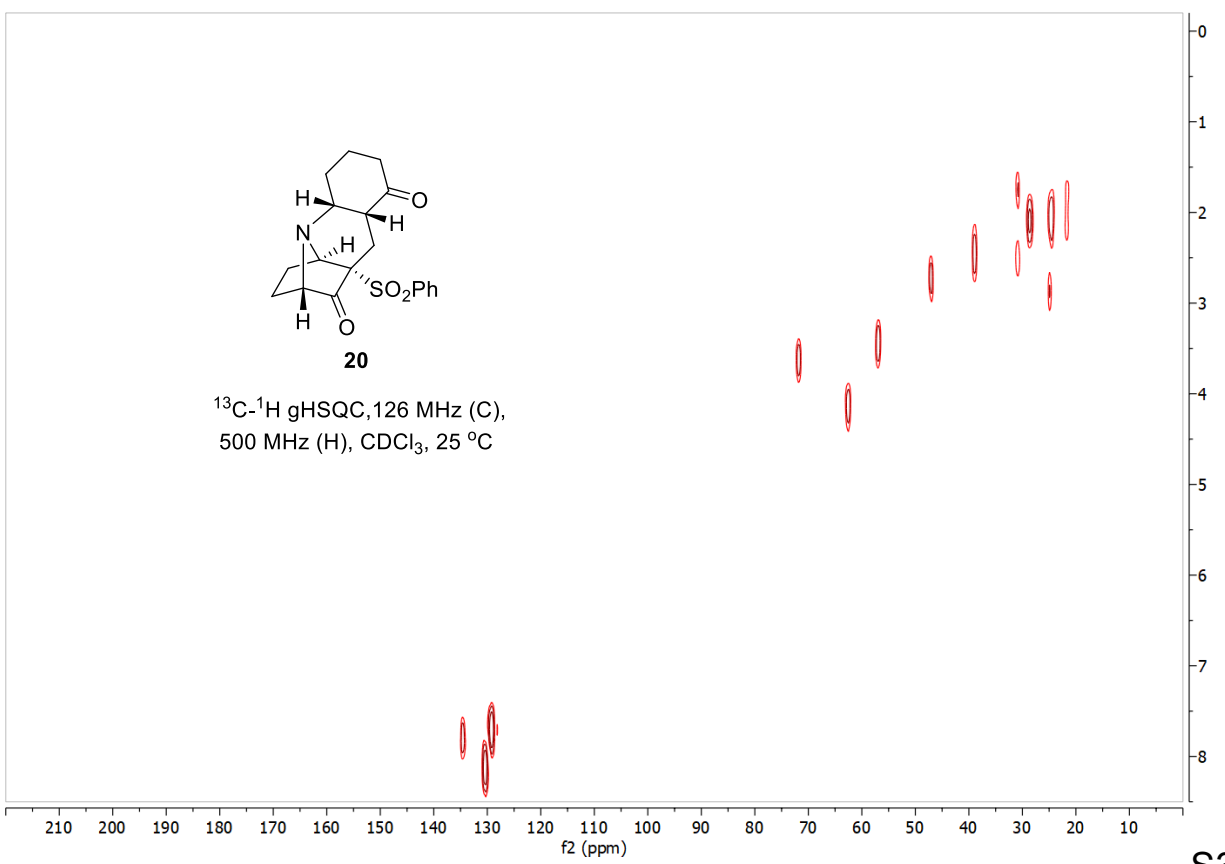

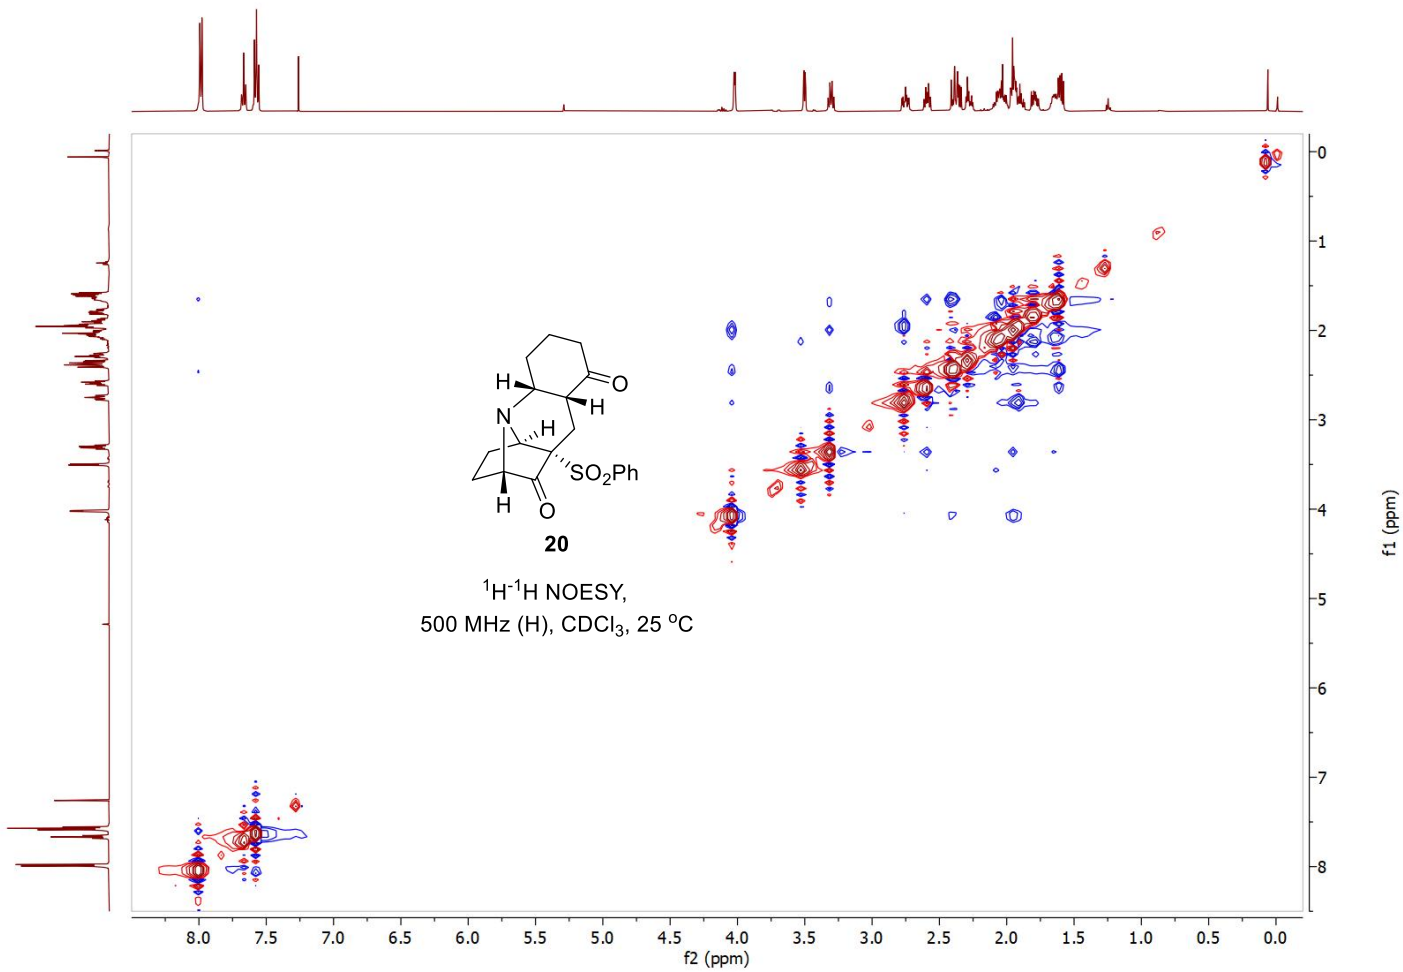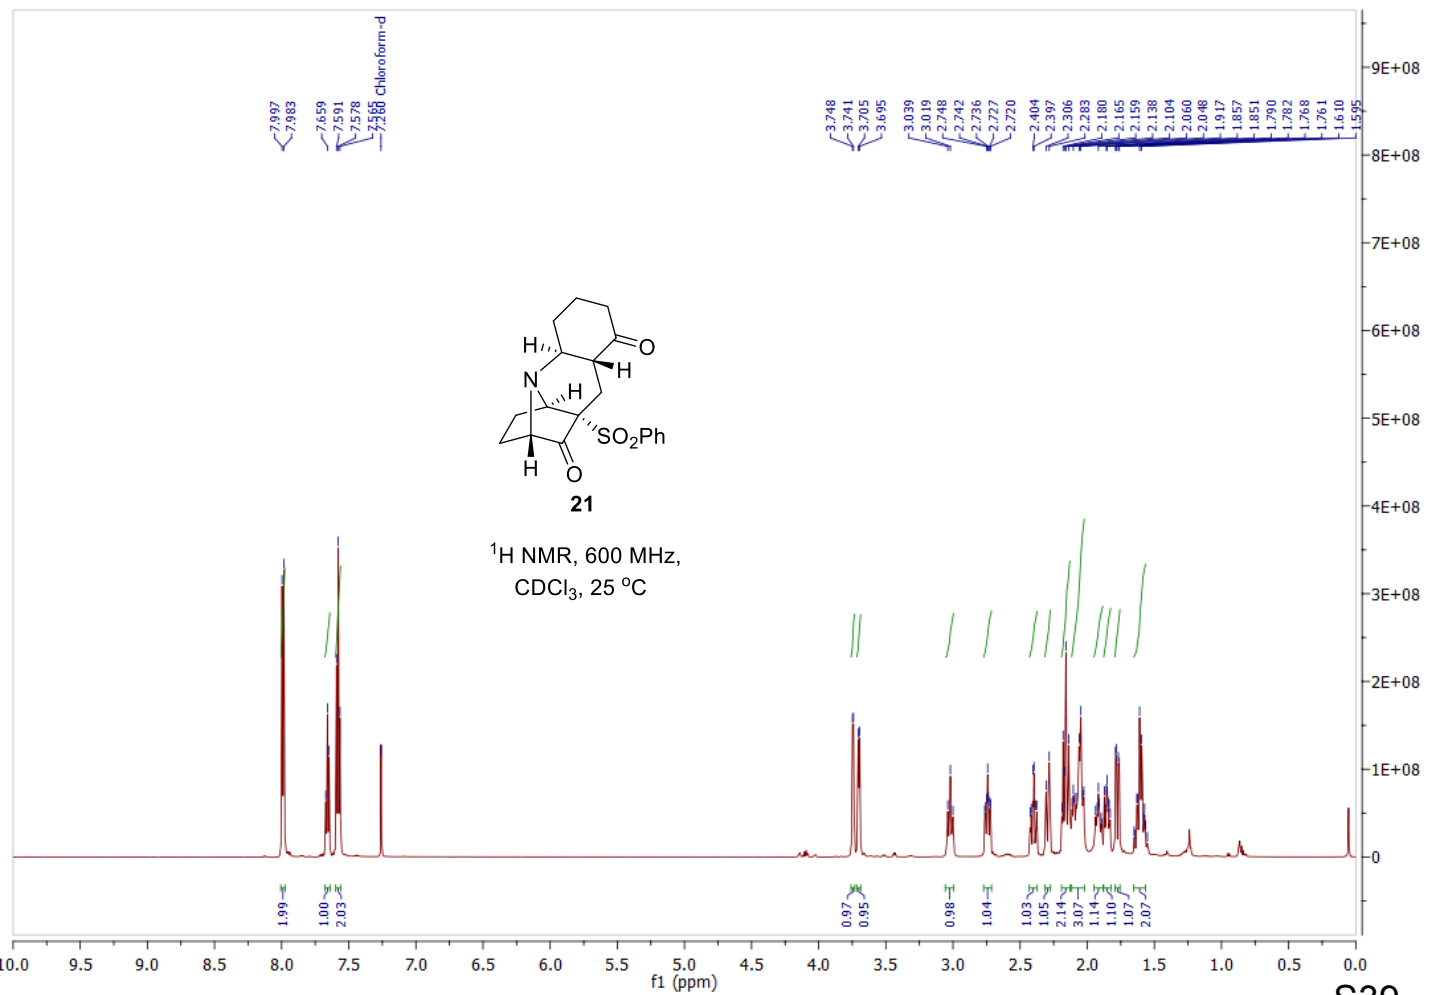

208.00  
206.90

136.69  
134.35  
130.10  
129.17

77.16 Chloroform-d  
74.56  
69.24  
66.27  
61.72

51.02

40.51

30.57  
30.18  
24.80  
23.85  
23.36

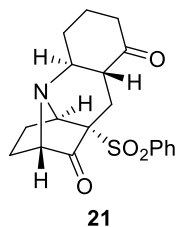

<sup>13</sup>C NMR, 151 MHz,  
CDCl<sub>3</sub>, 25 °C

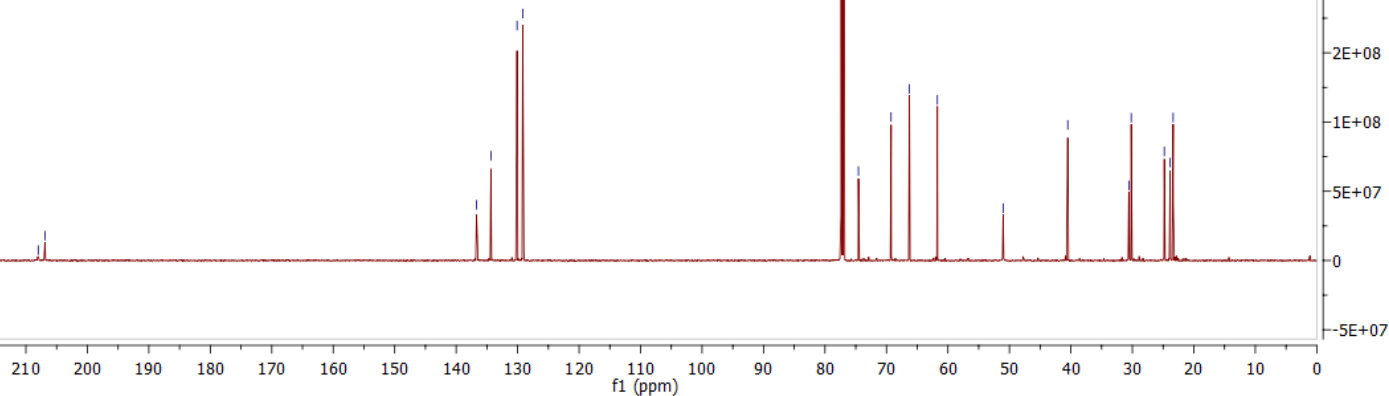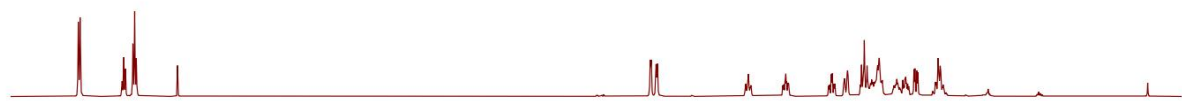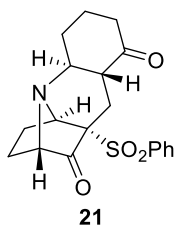

<sup>1</sup>H-<sup>1</sup>H gCOSY,  
600 MHz (H), CDCl<sub>3</sub>, 25 °C

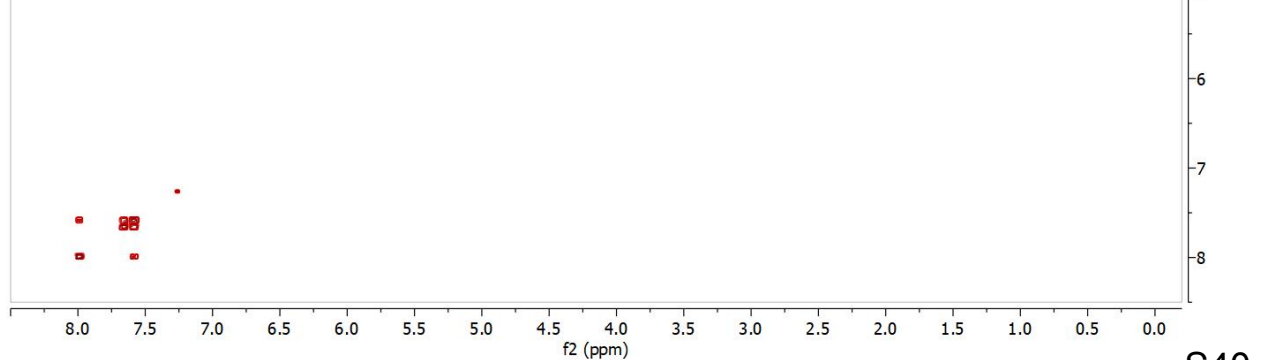

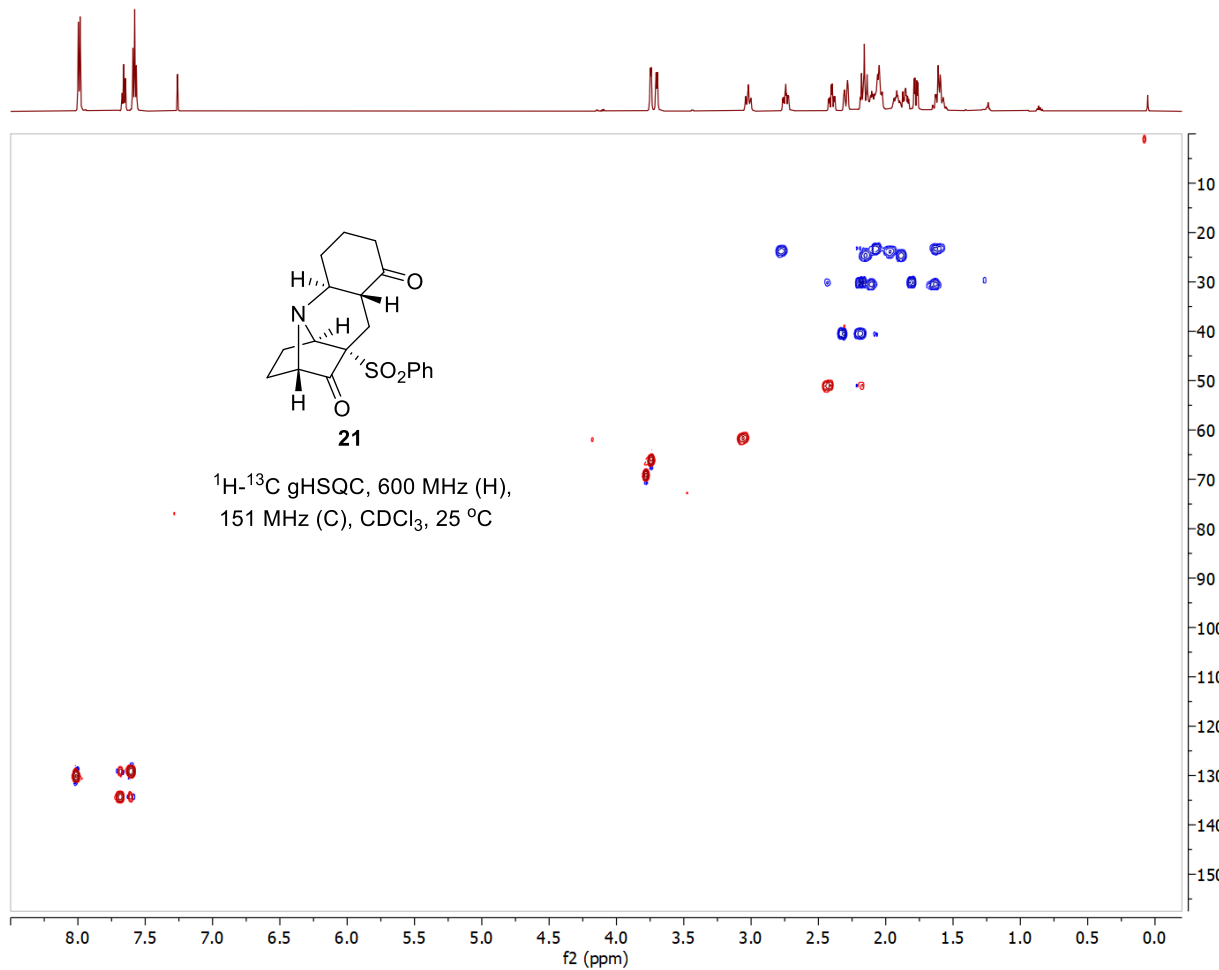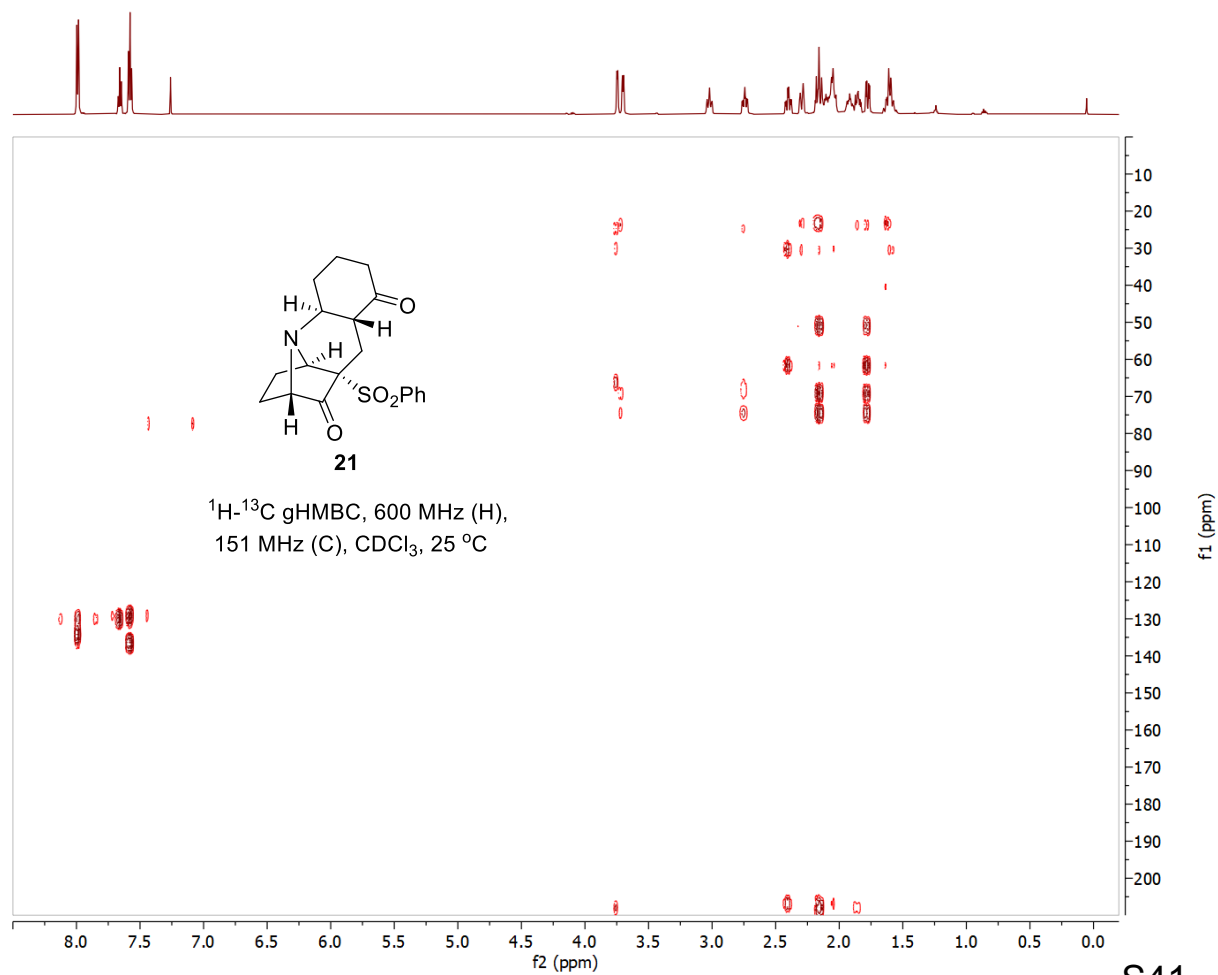

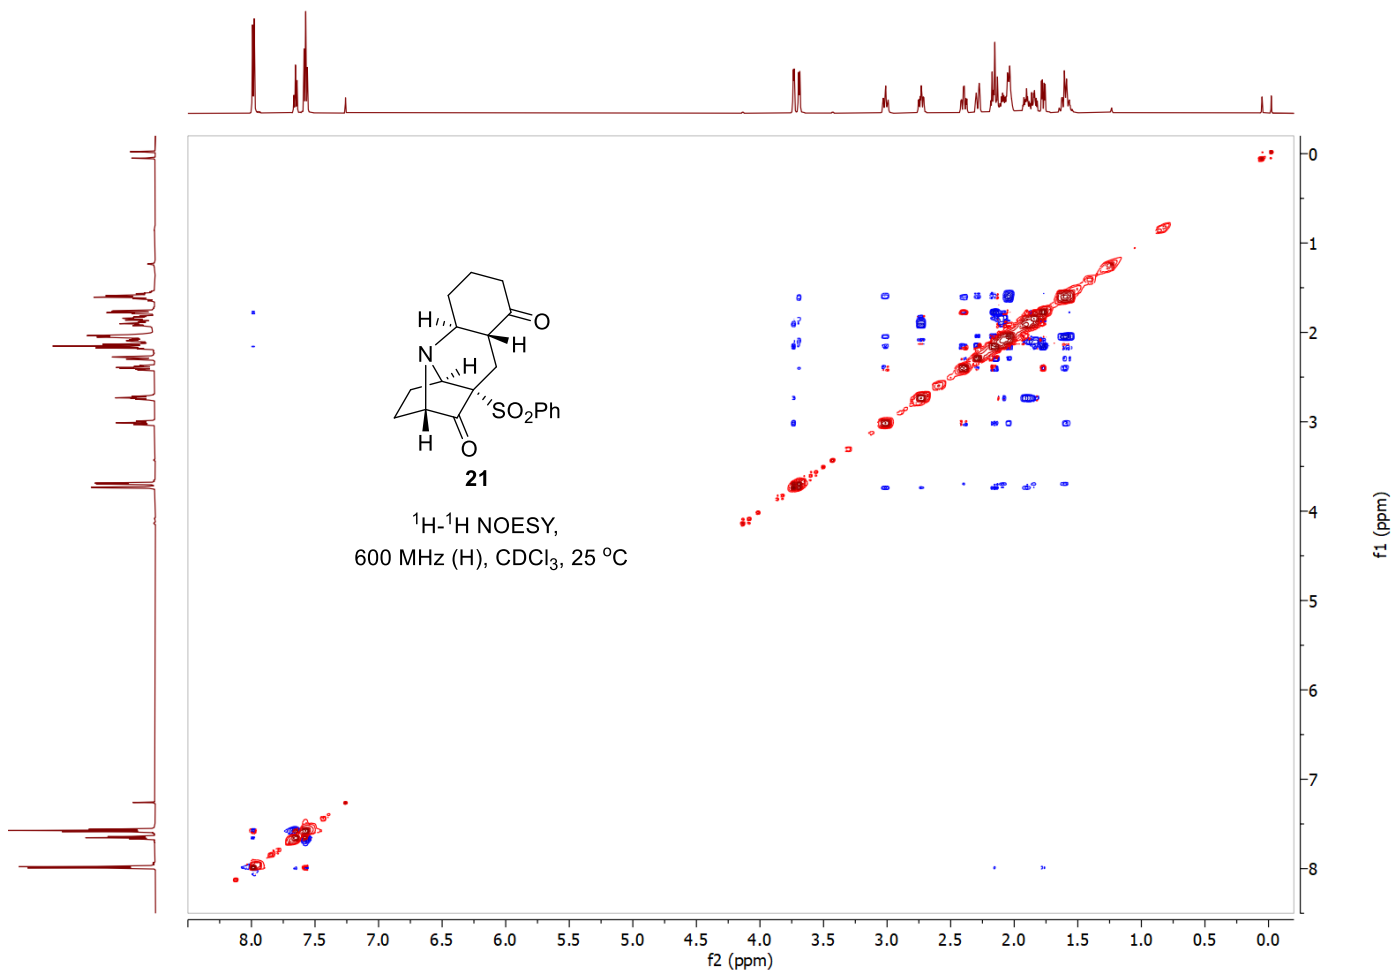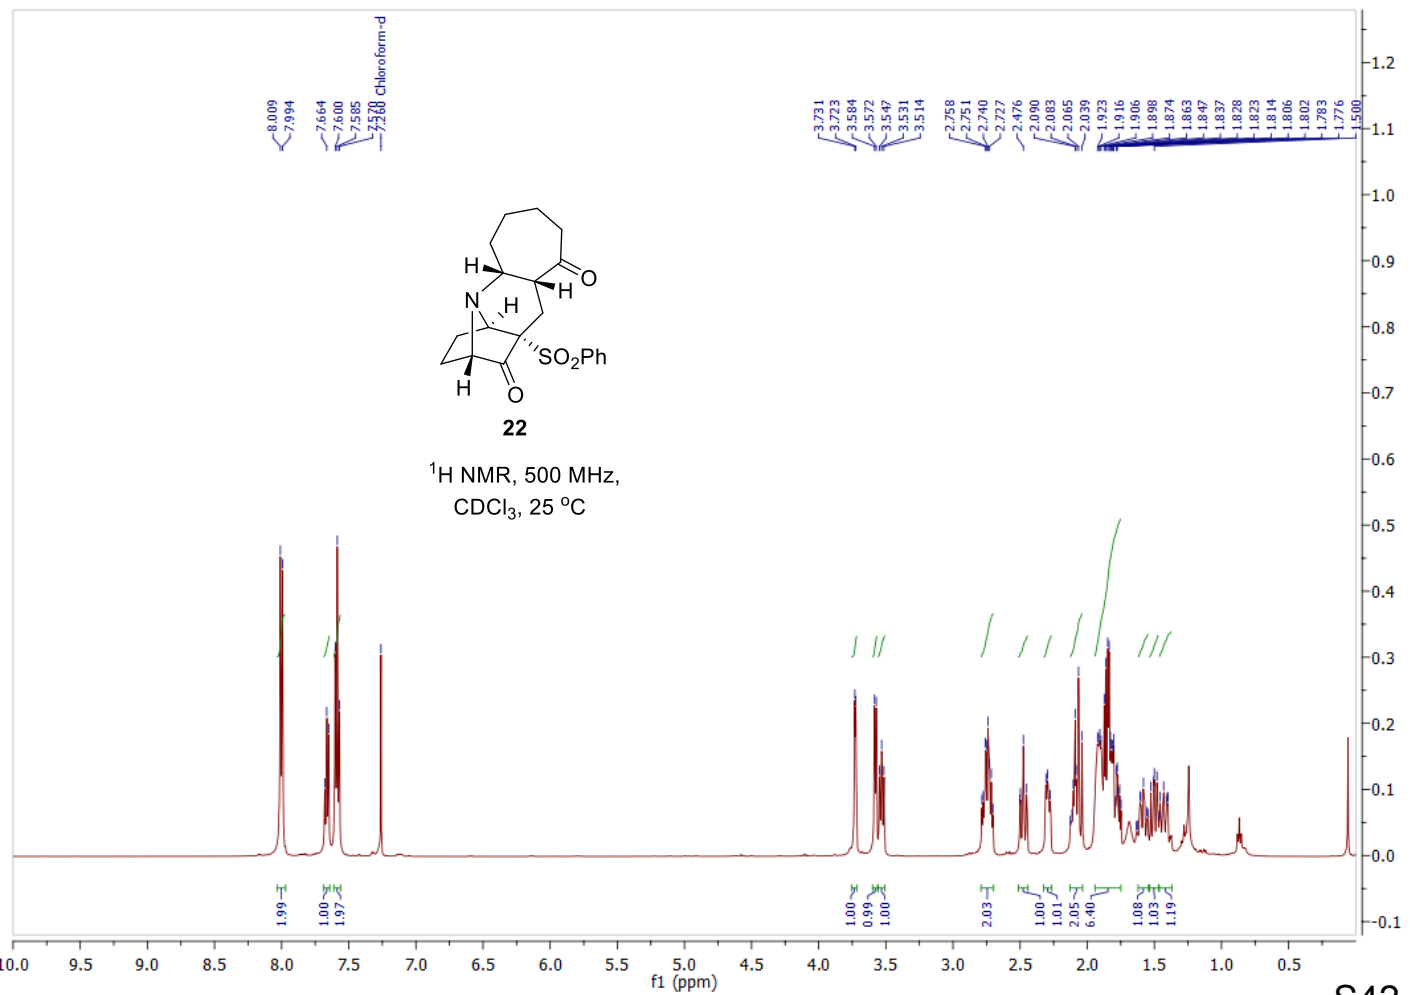

210.57  
208.29

136.51  
134.32  
130.24  
129.13

77.36 Chloroform-d  
74.33  
70.96

62.36

55.91

48.44

41.80

33.61

29.57

28.85

26.27

24.76

24.32

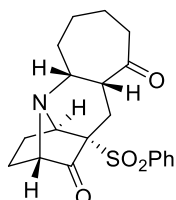

22

$^{13}\text{C}$  NMR, 126 MHz,  
 $\text{CDCl}_3$ , 25 °C

210 200 190 180 170 160 150 140 130 120 110 100 90 80 70 60 50 40 30 20 10 0

f1 (ppm)

2200  
2100  
2000  
1900  
1800  
1700  
1600  
1500  
1400  
1300  
1200  
1100  
1000  
900  
800  
700  
600  
500  
400  
300  
200  
100  
0  
-100  
-200

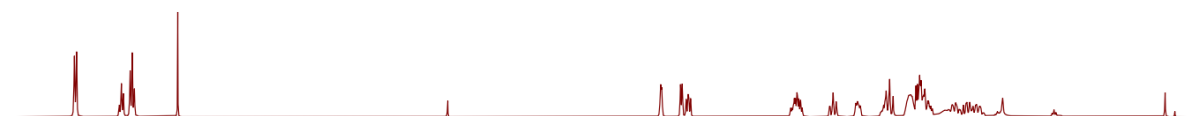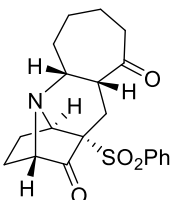

22

$^1\text{H}$ - $^1\text{H}$  gCOSY,  
500 MHz (H),  $\text{CDCl}_3$ , 25 °C

8.0 7.5 7.0 6.5 6.0 5.5 5.0 4.5 4.0 3.5 3.0 2.5 2.0 1.5 1.0 0.5 0.0

f2 (ppm)

f1 (ppm)

S43

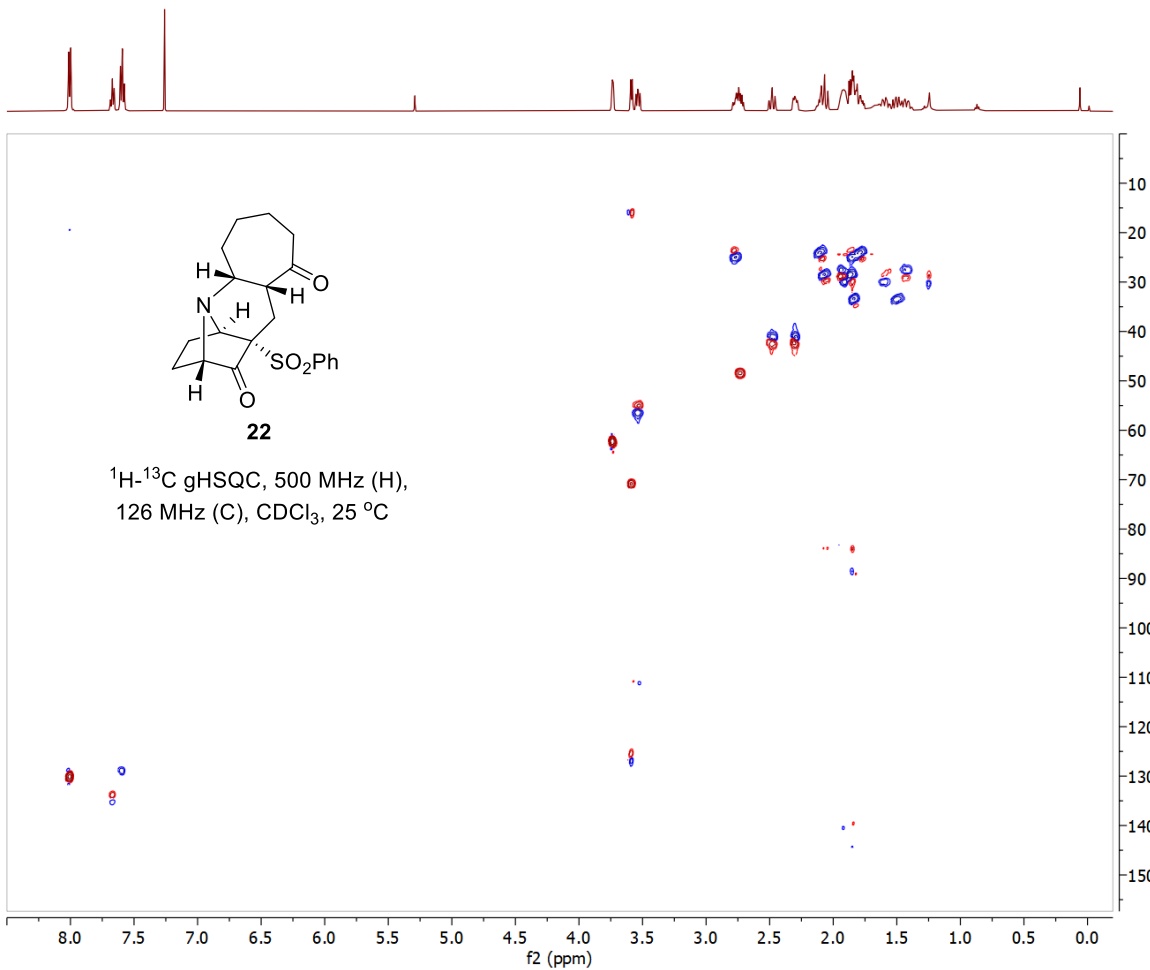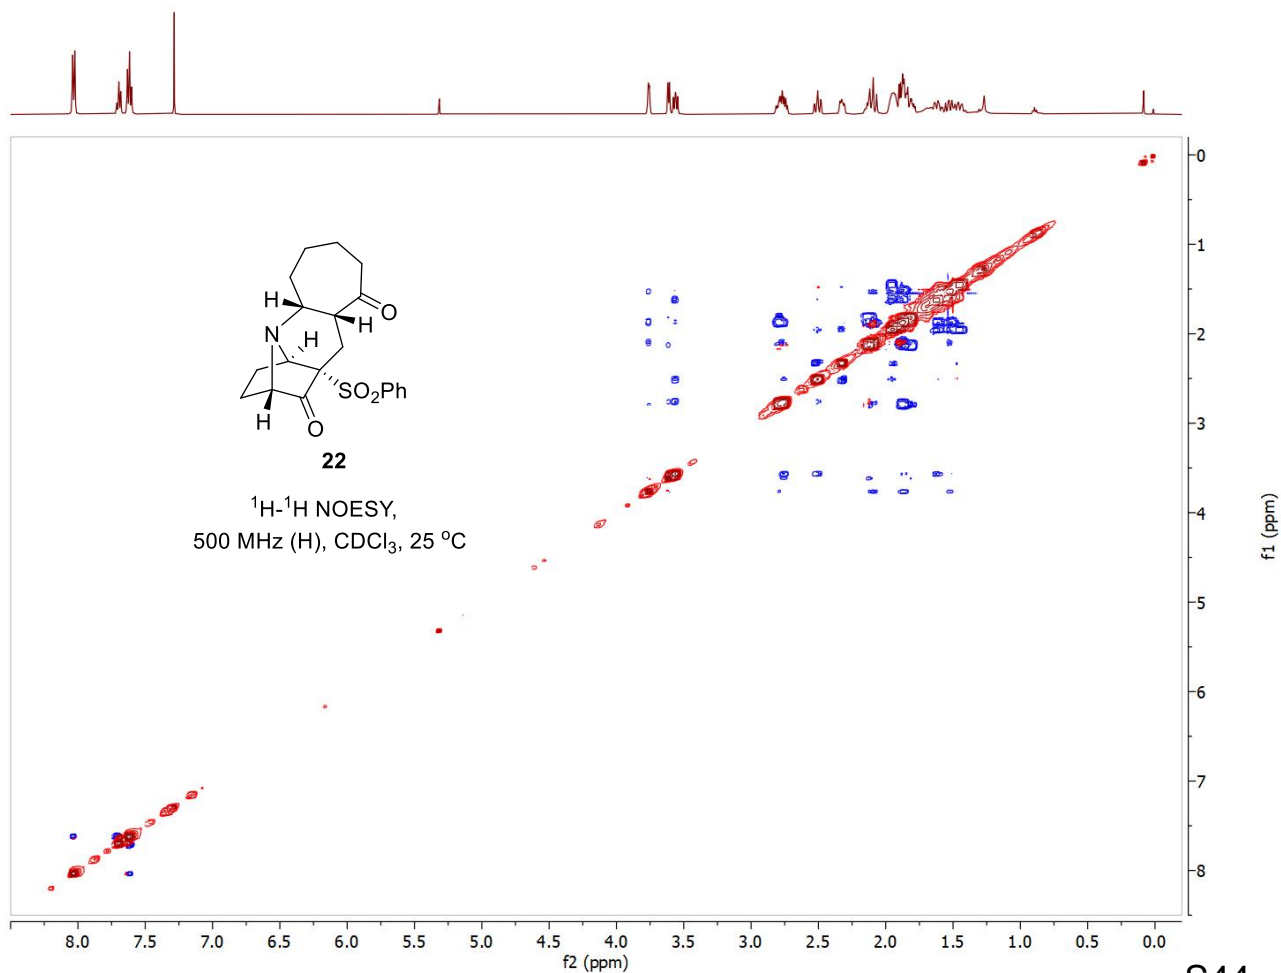

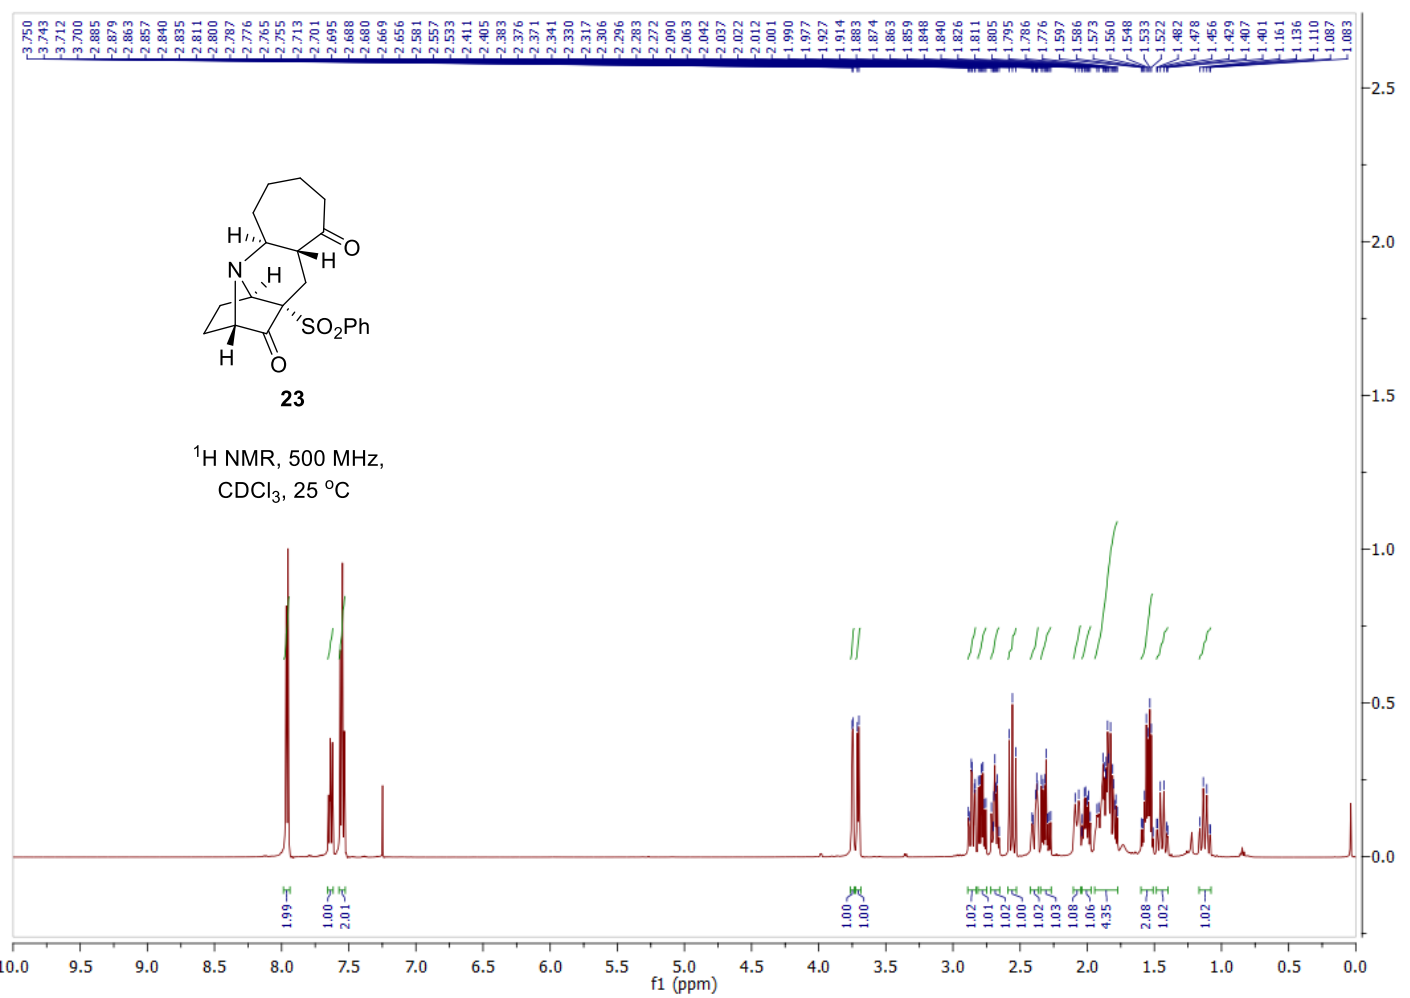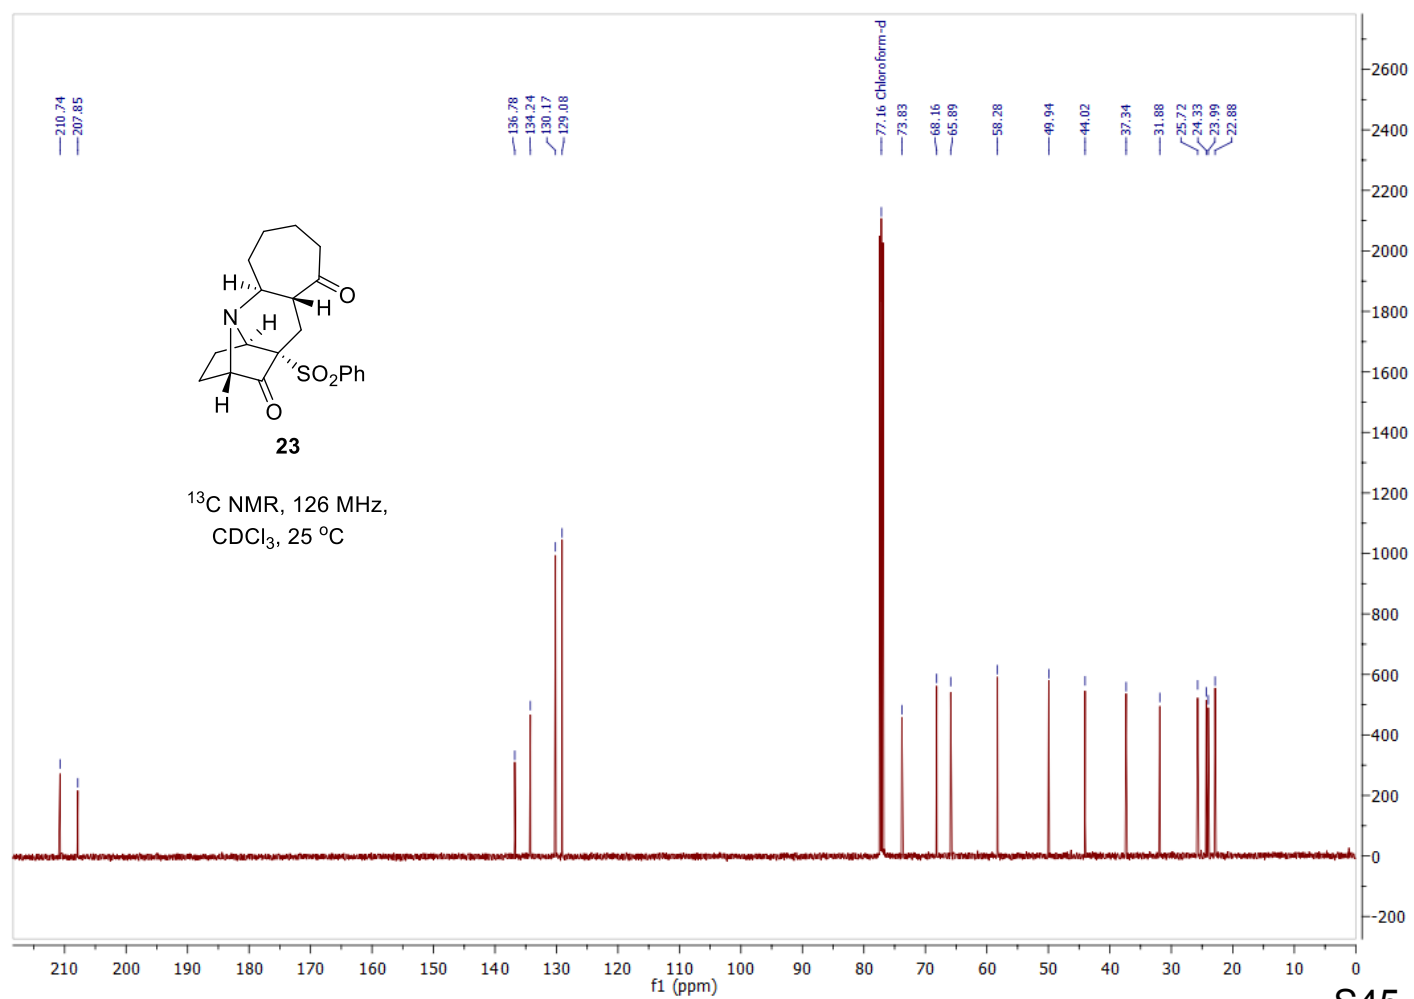

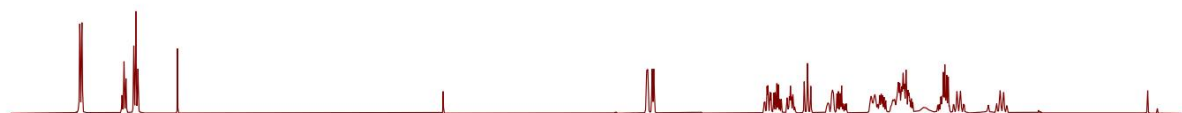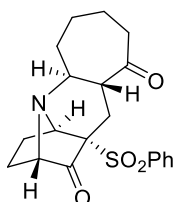

23

<sup>1</sup>H-<sup>1</sup>H gCOSY,  
500 MHz (H), CDCl<sub>3</sub>, 25 °C

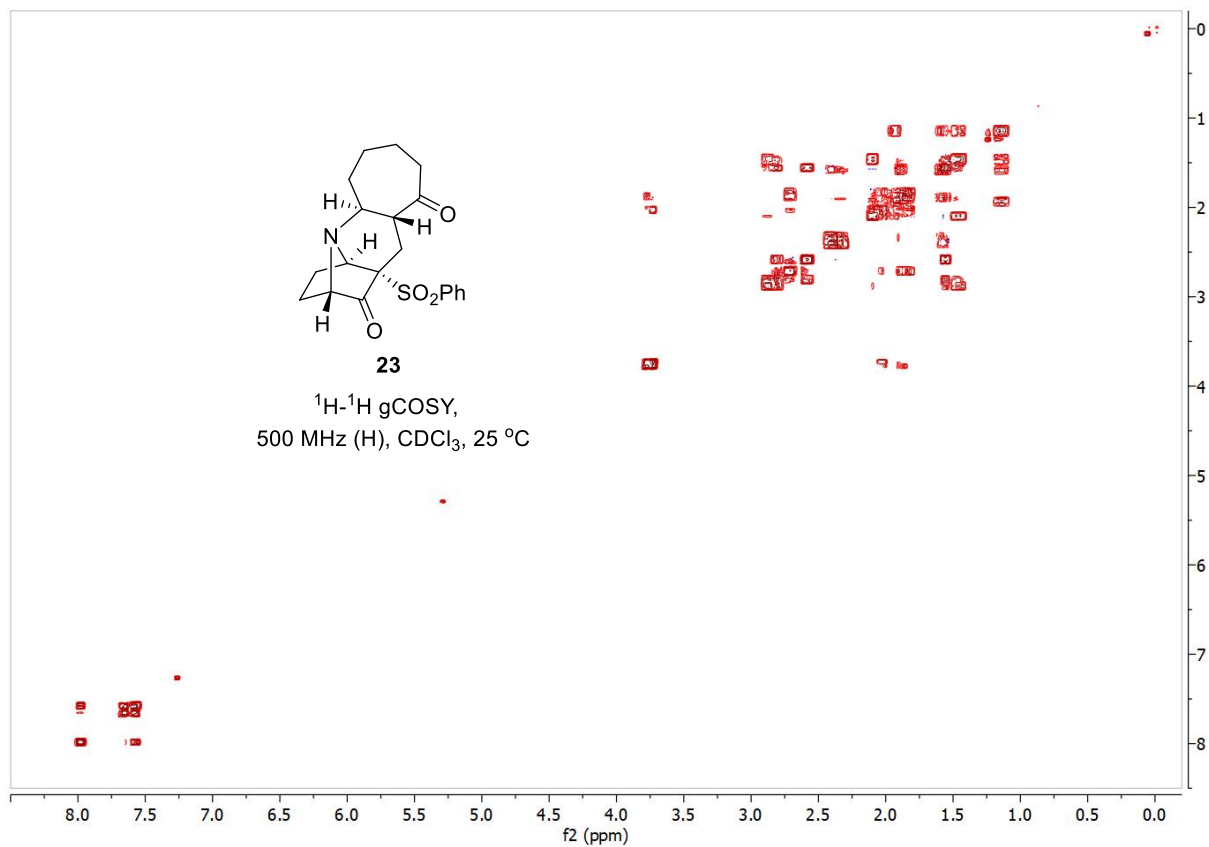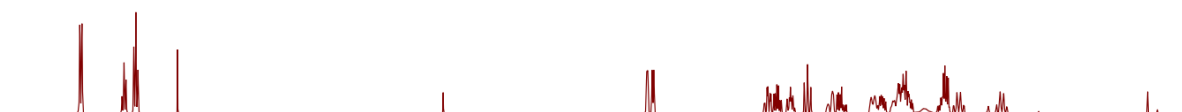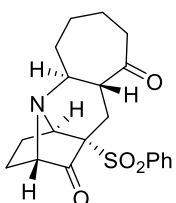

23

<sup>1</sup>H-<sup>13</sup>C gHSQC, 500 MHz (H),  
126 MHz (C), CDCl<sub>3</sub>, 25 °C

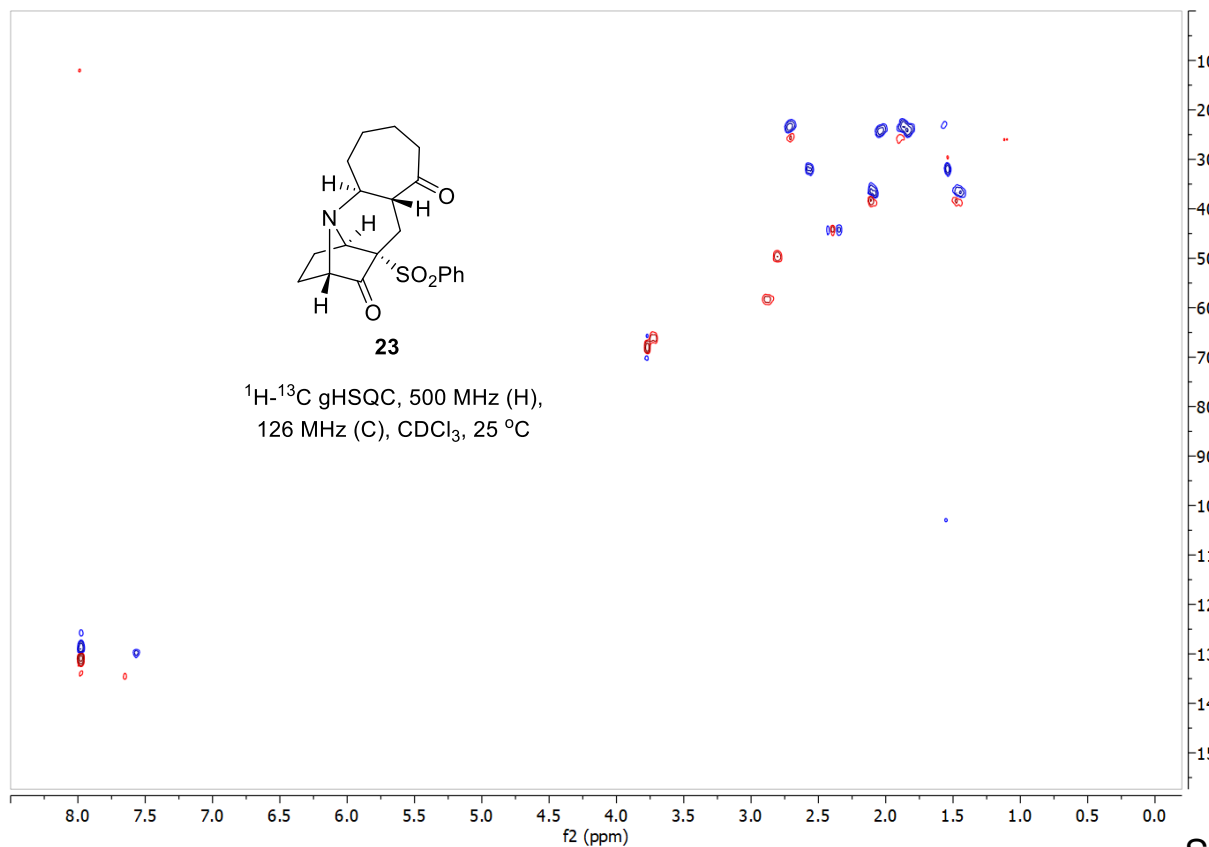

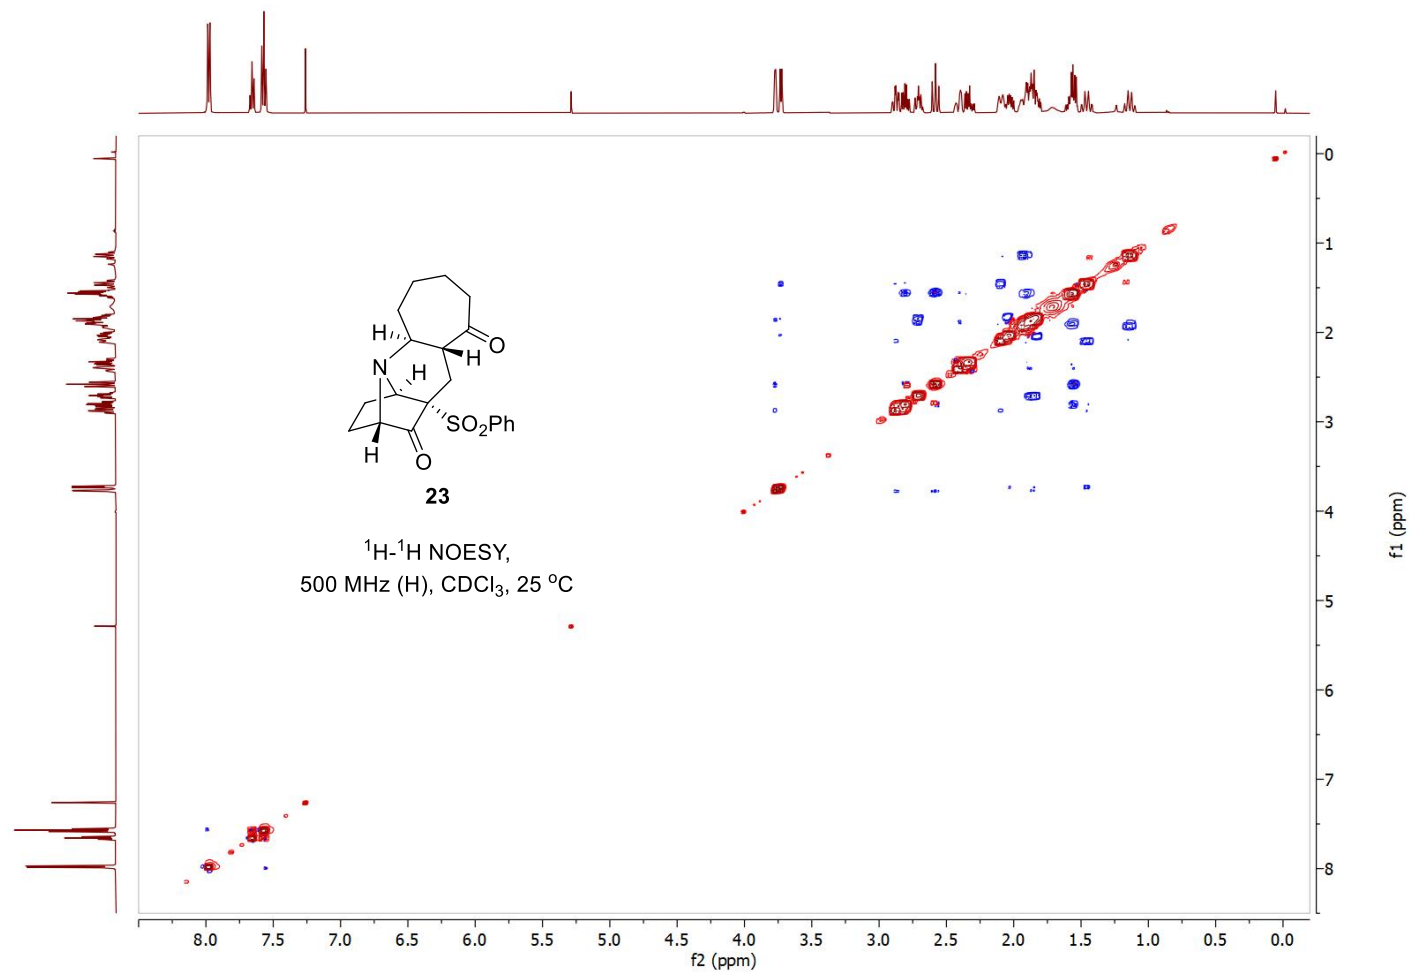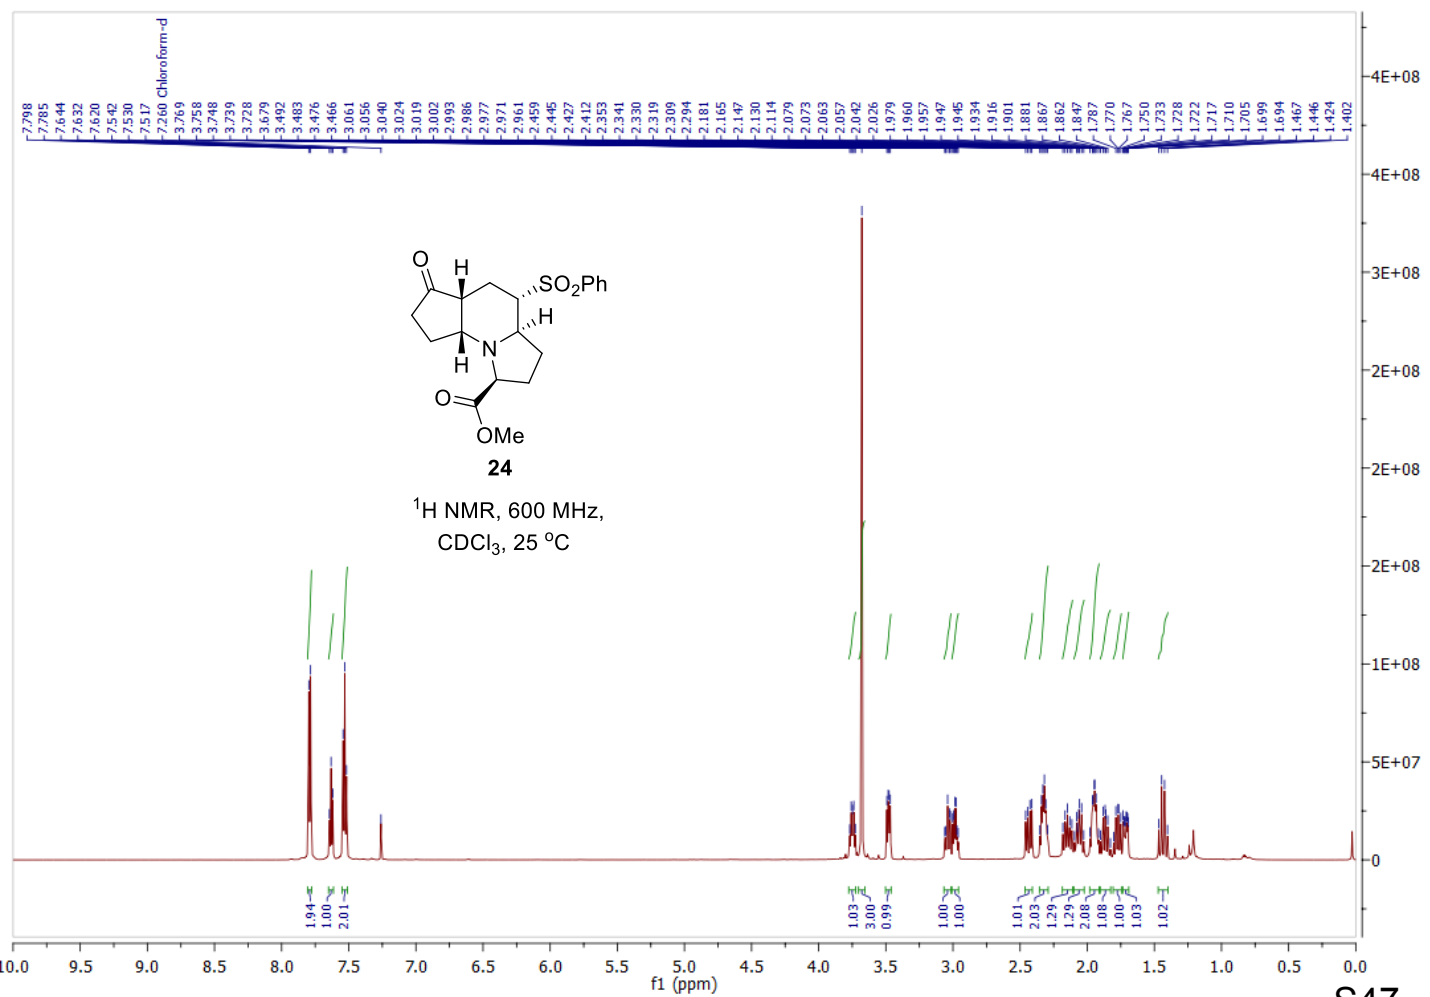

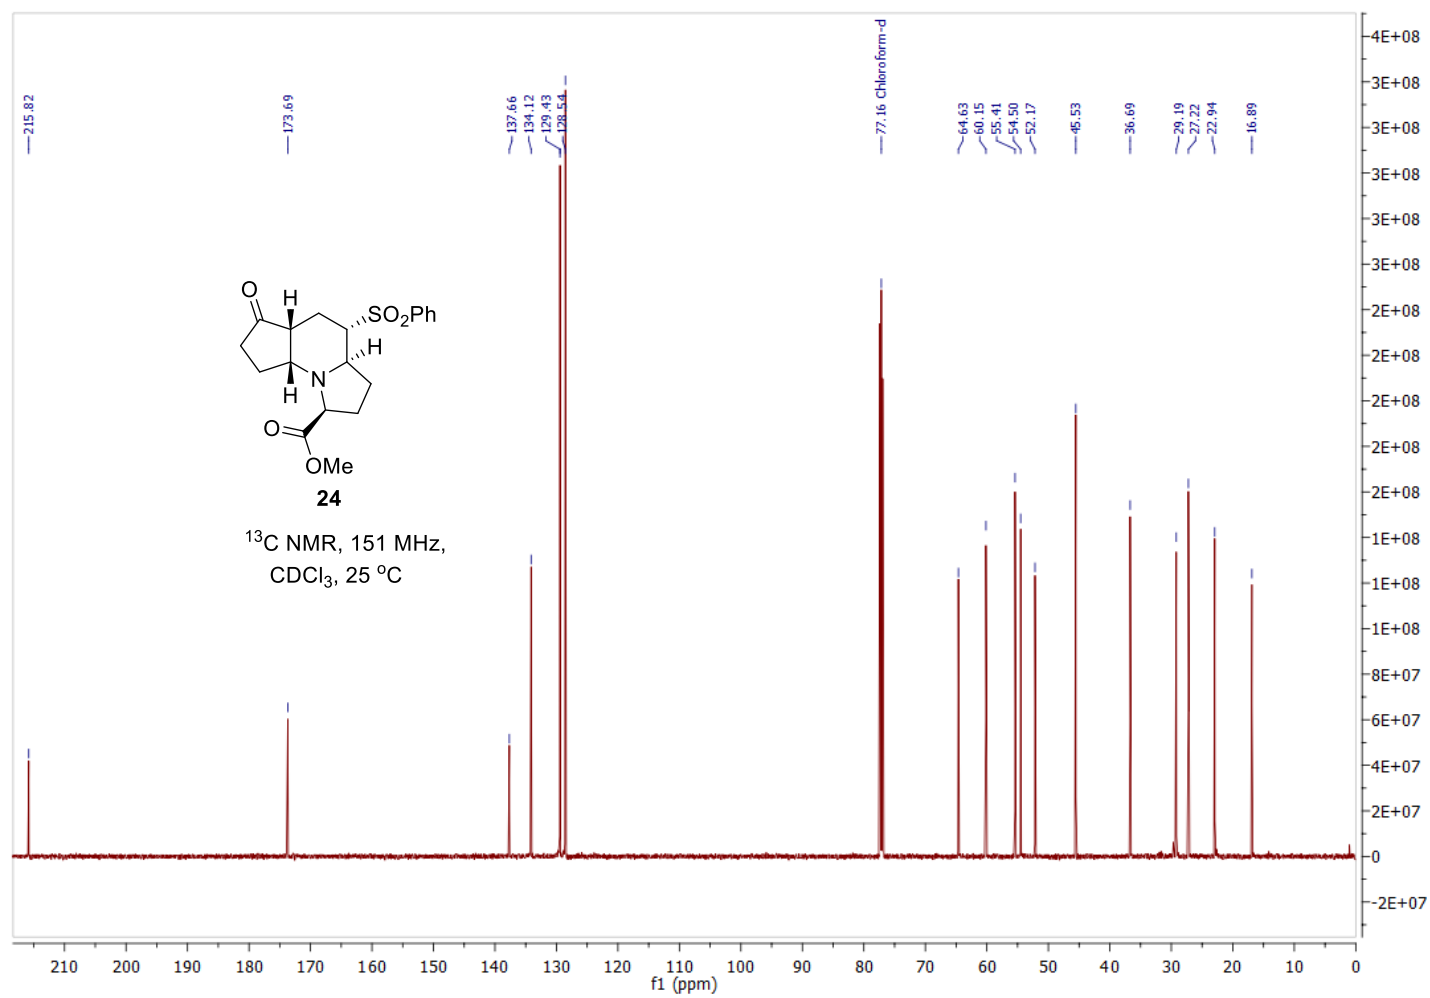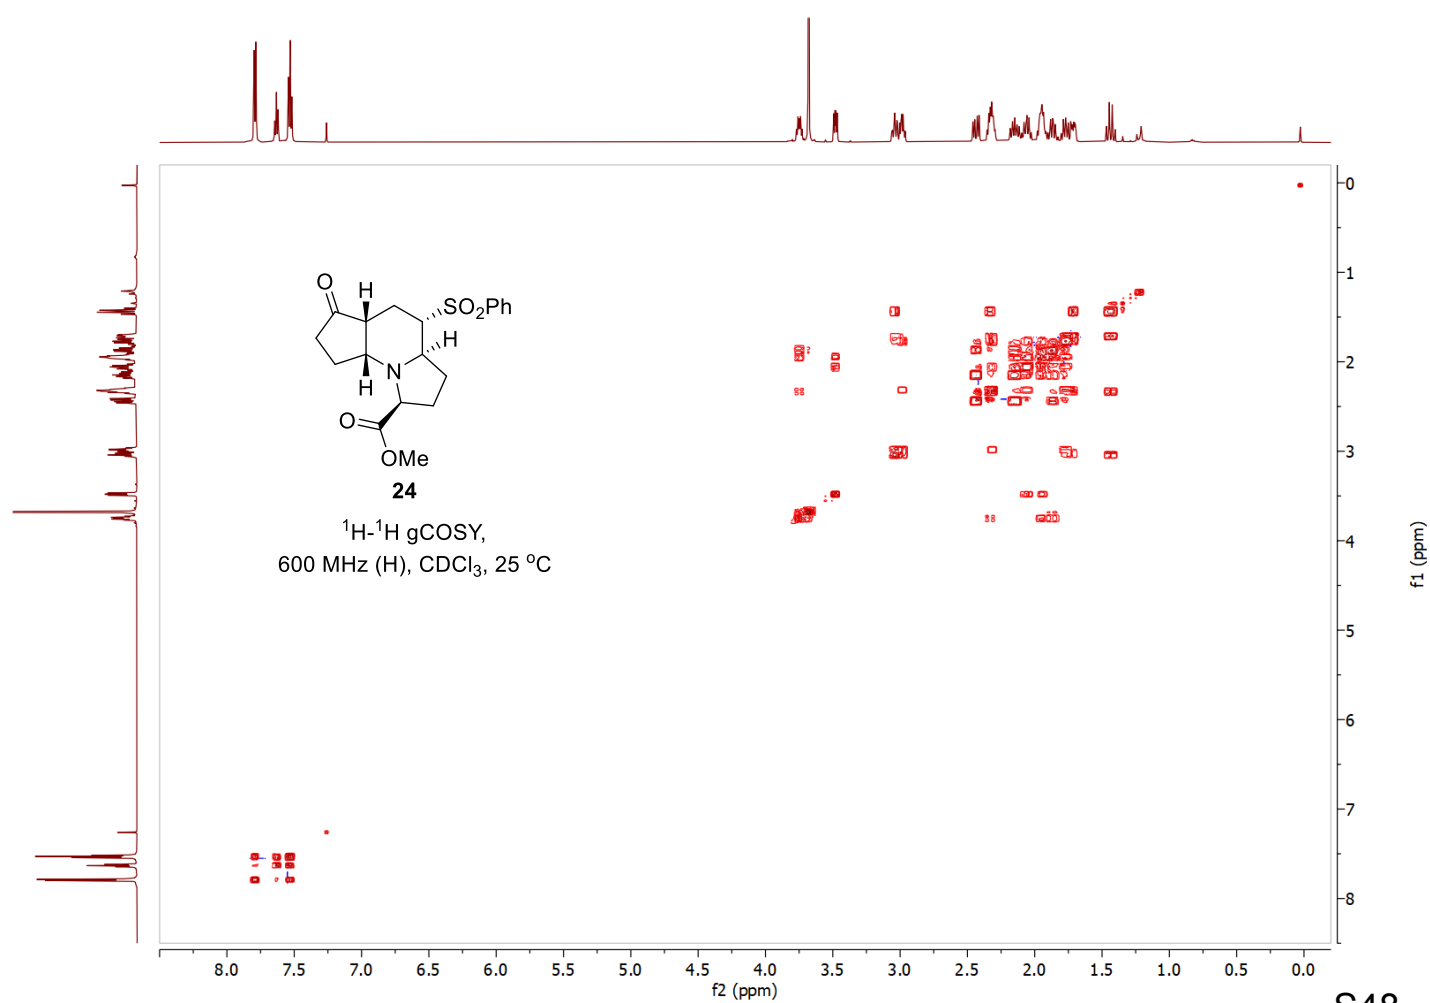

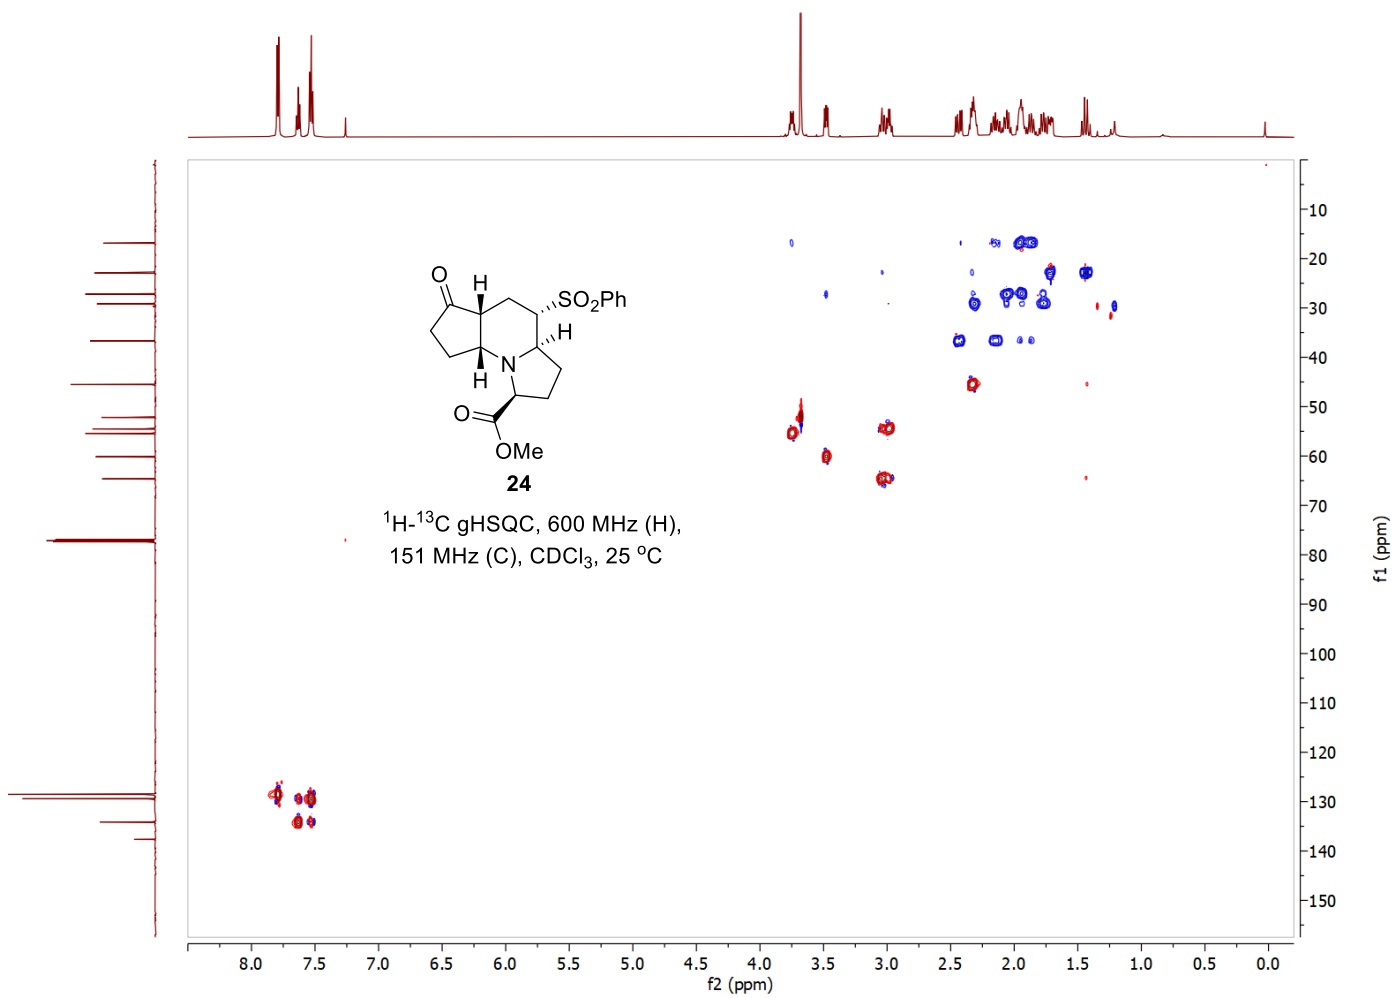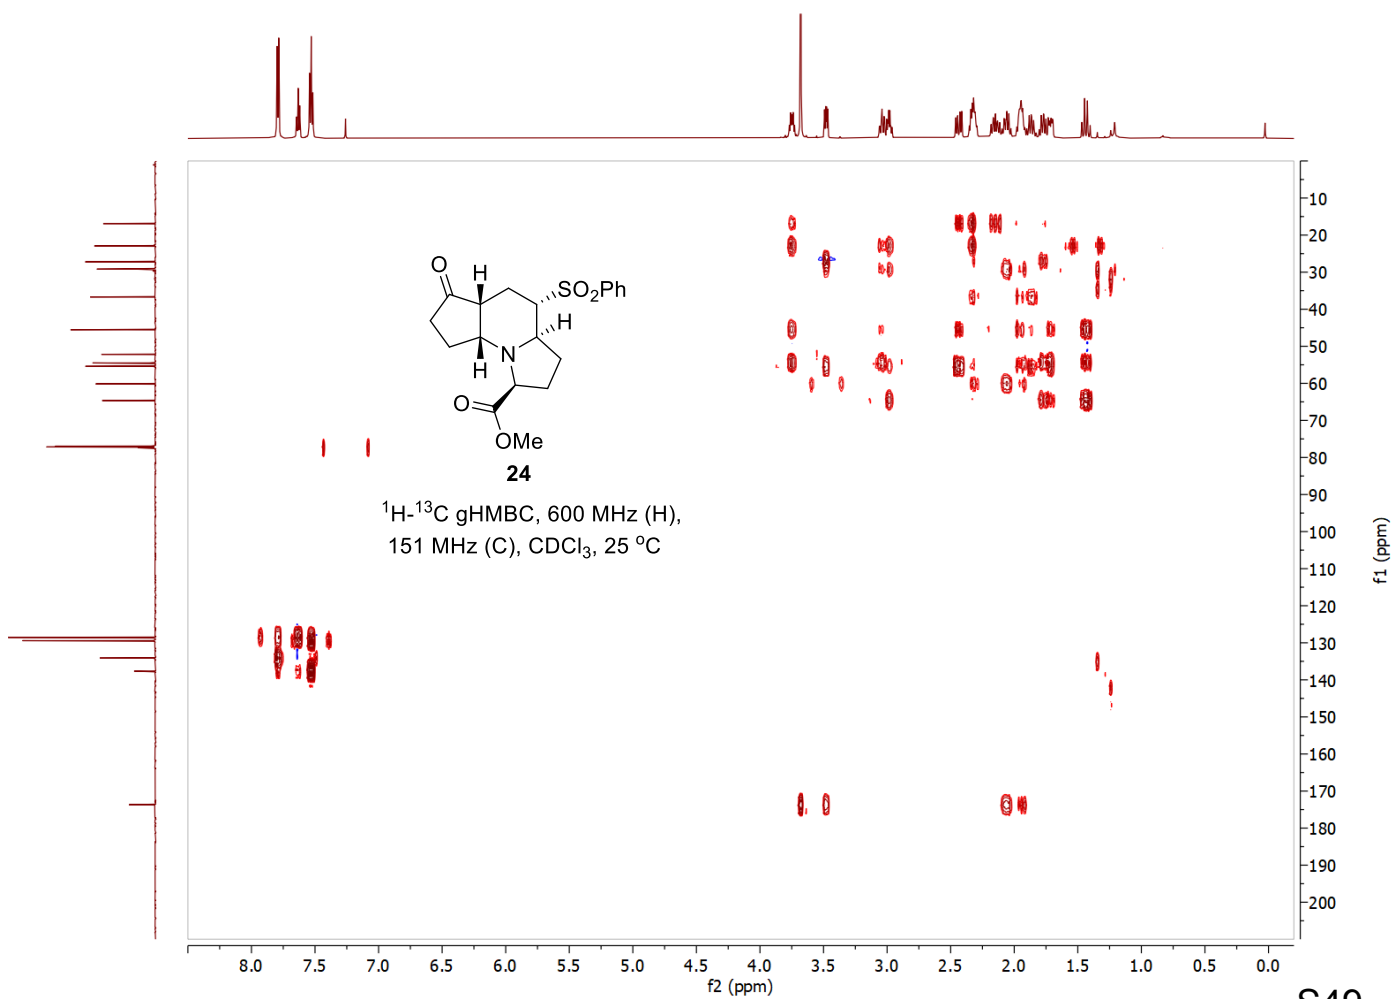

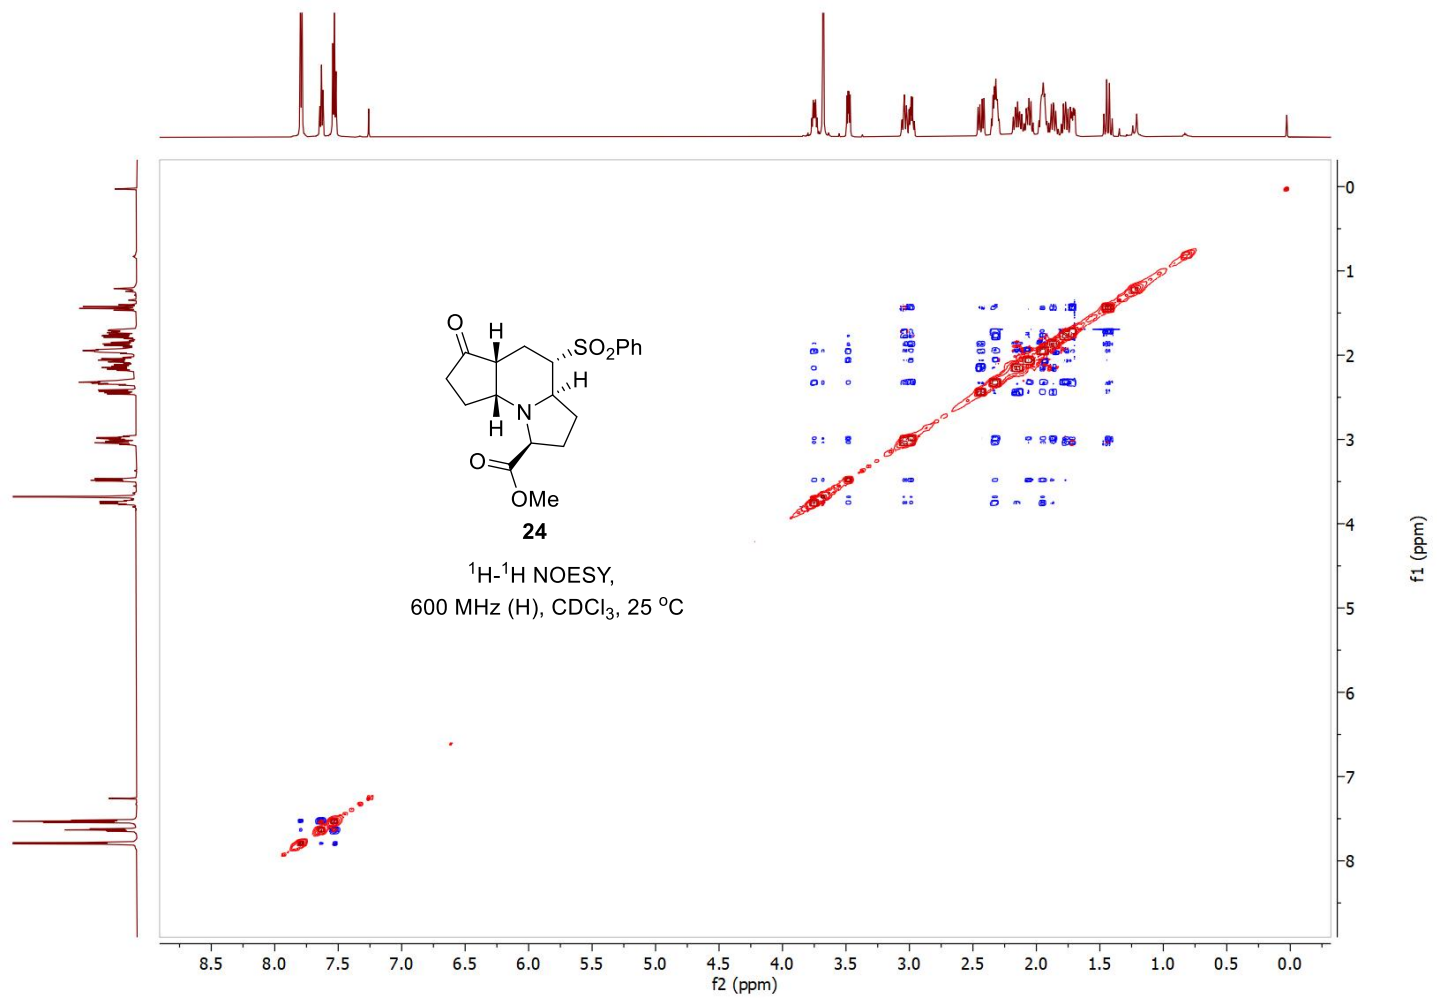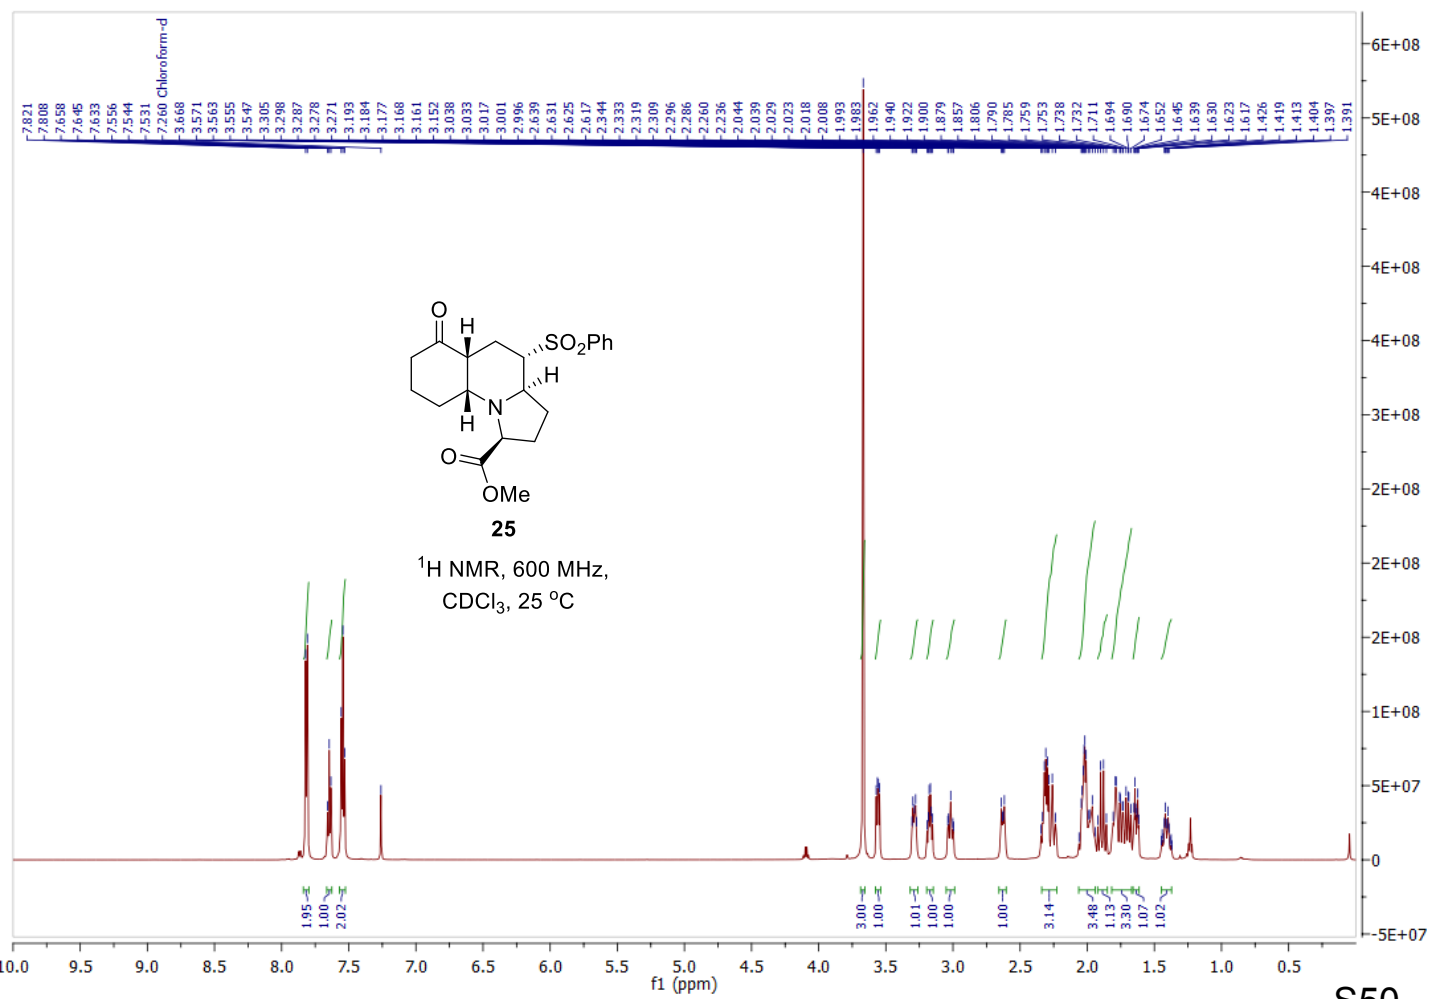

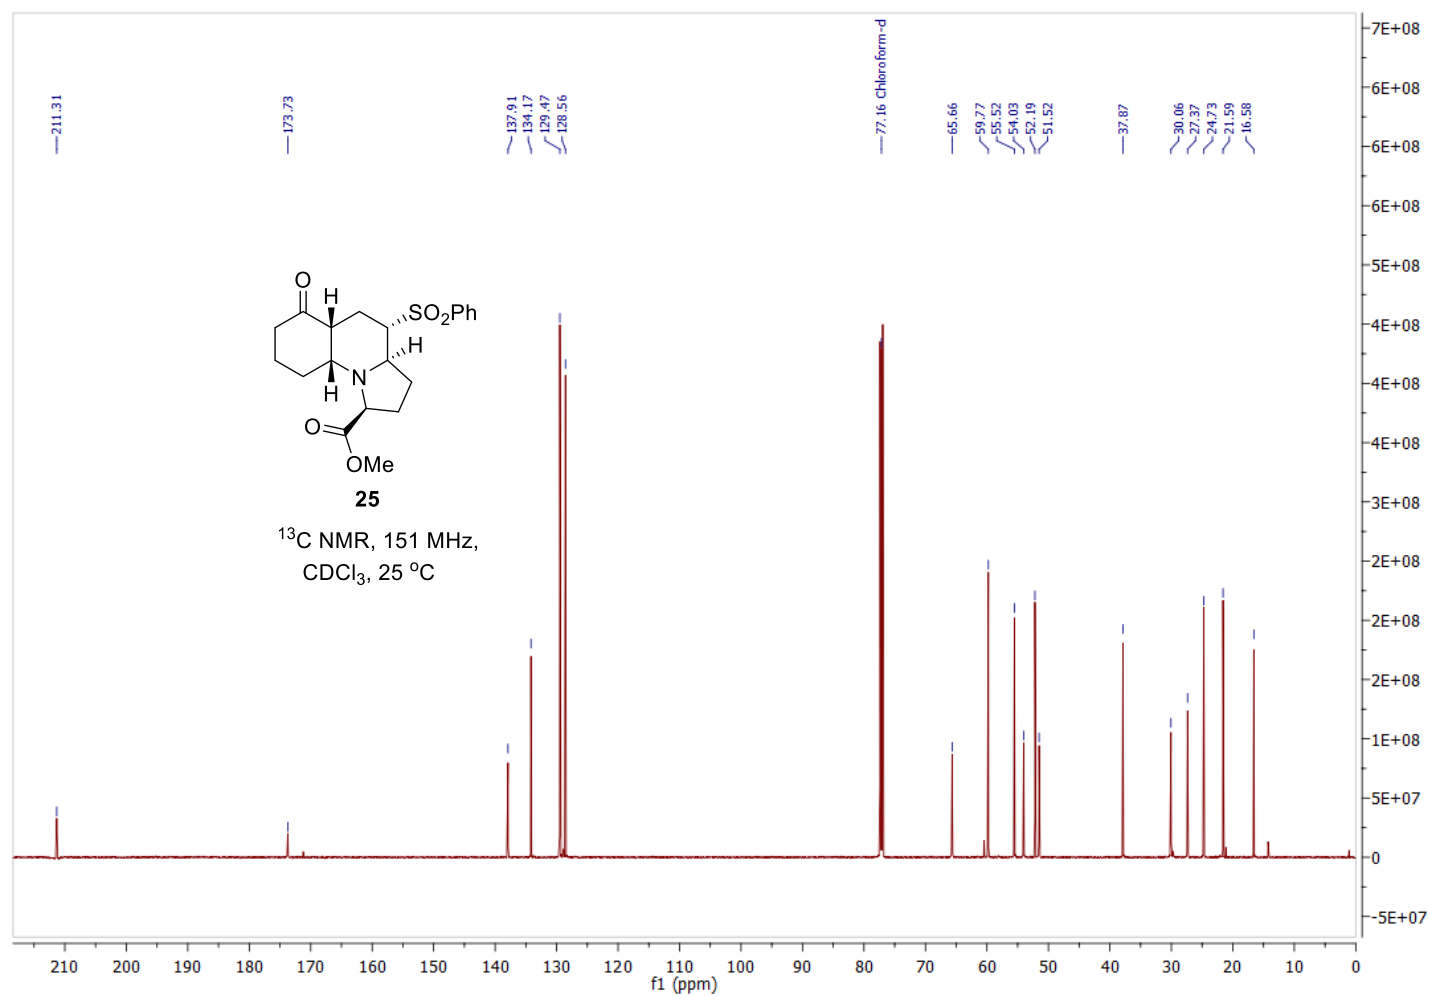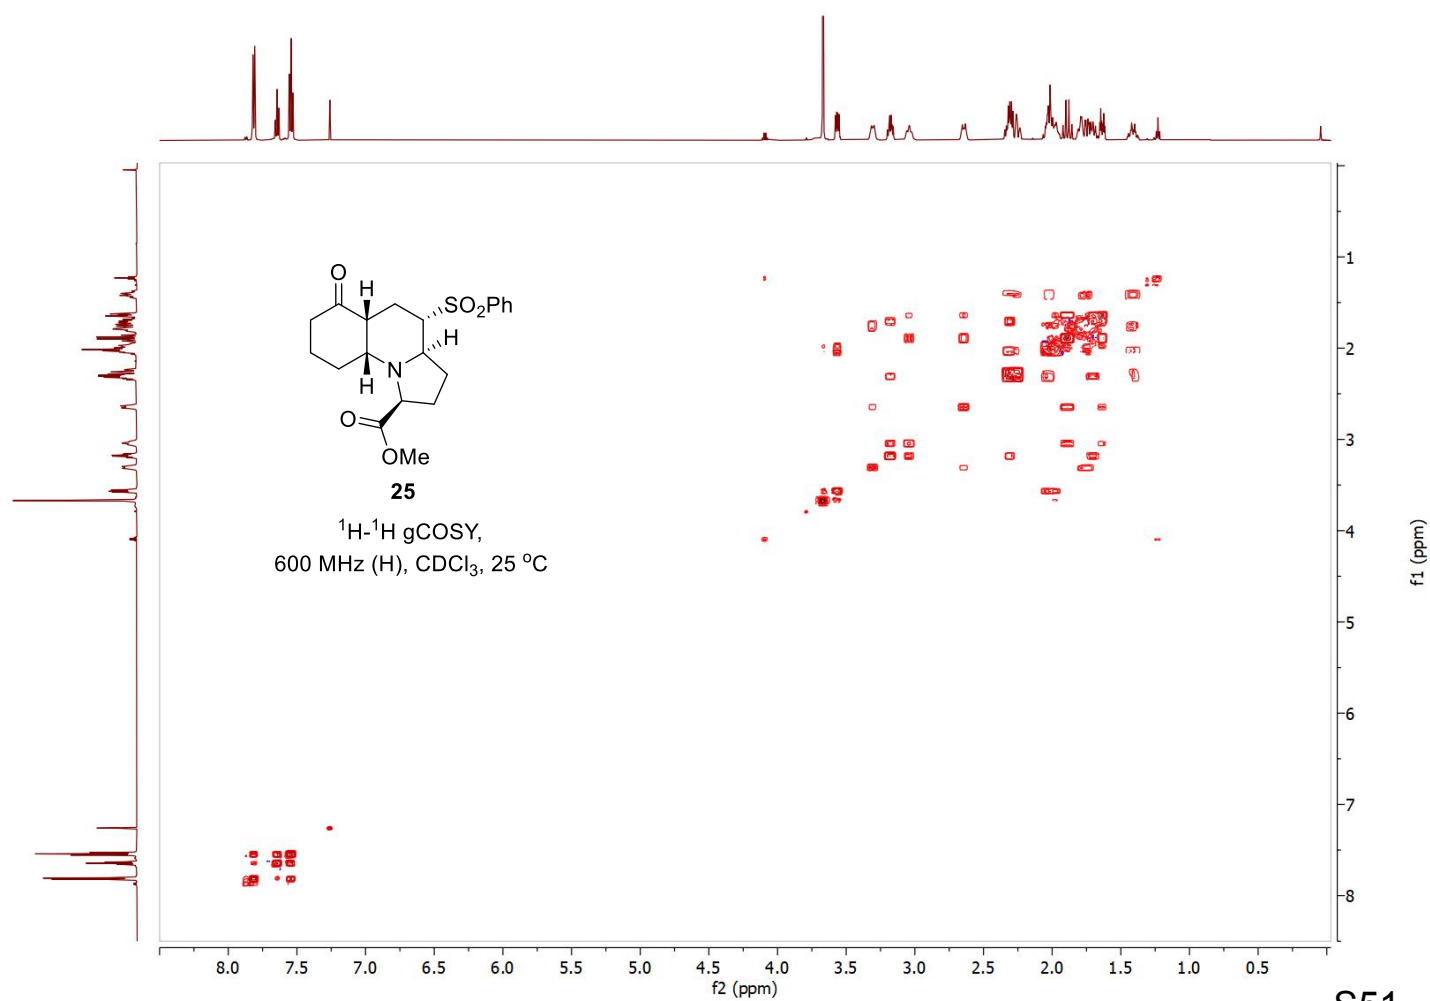

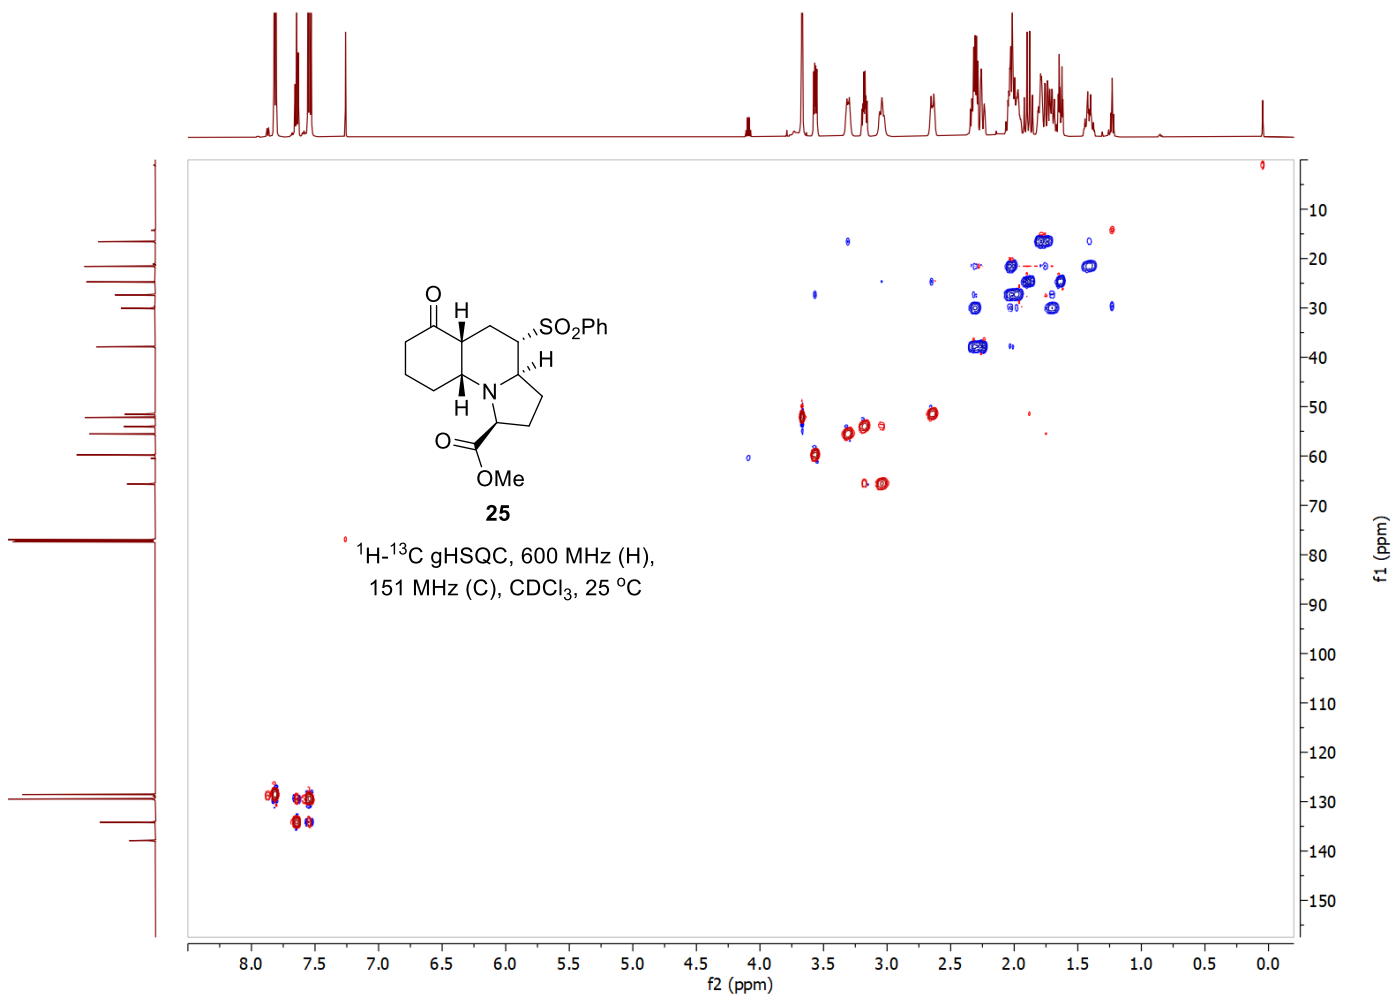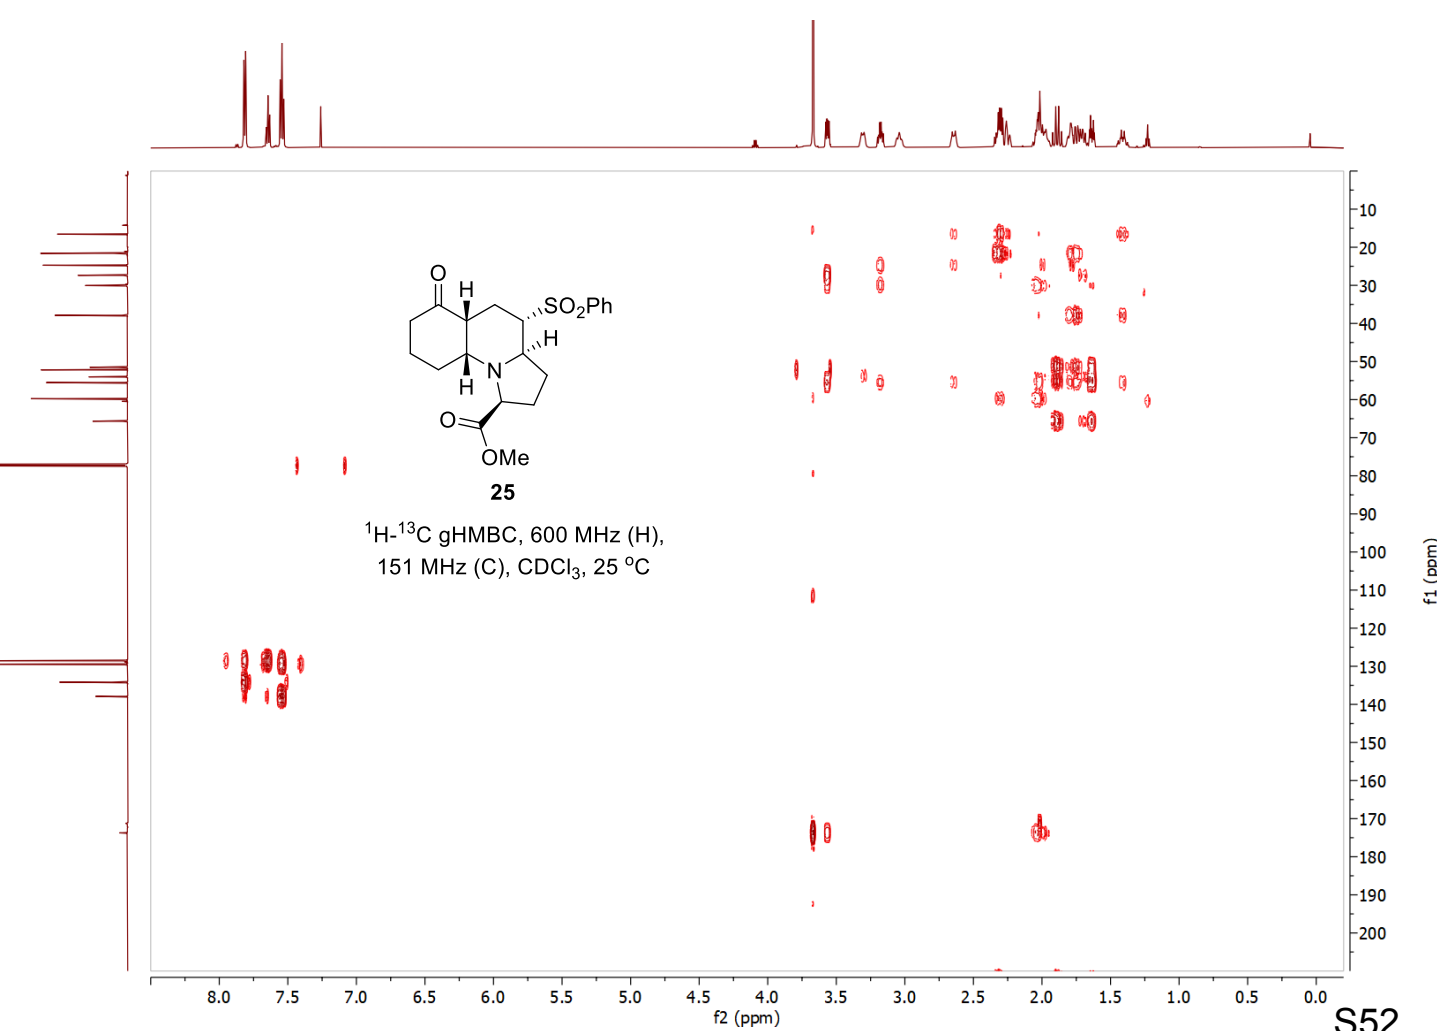

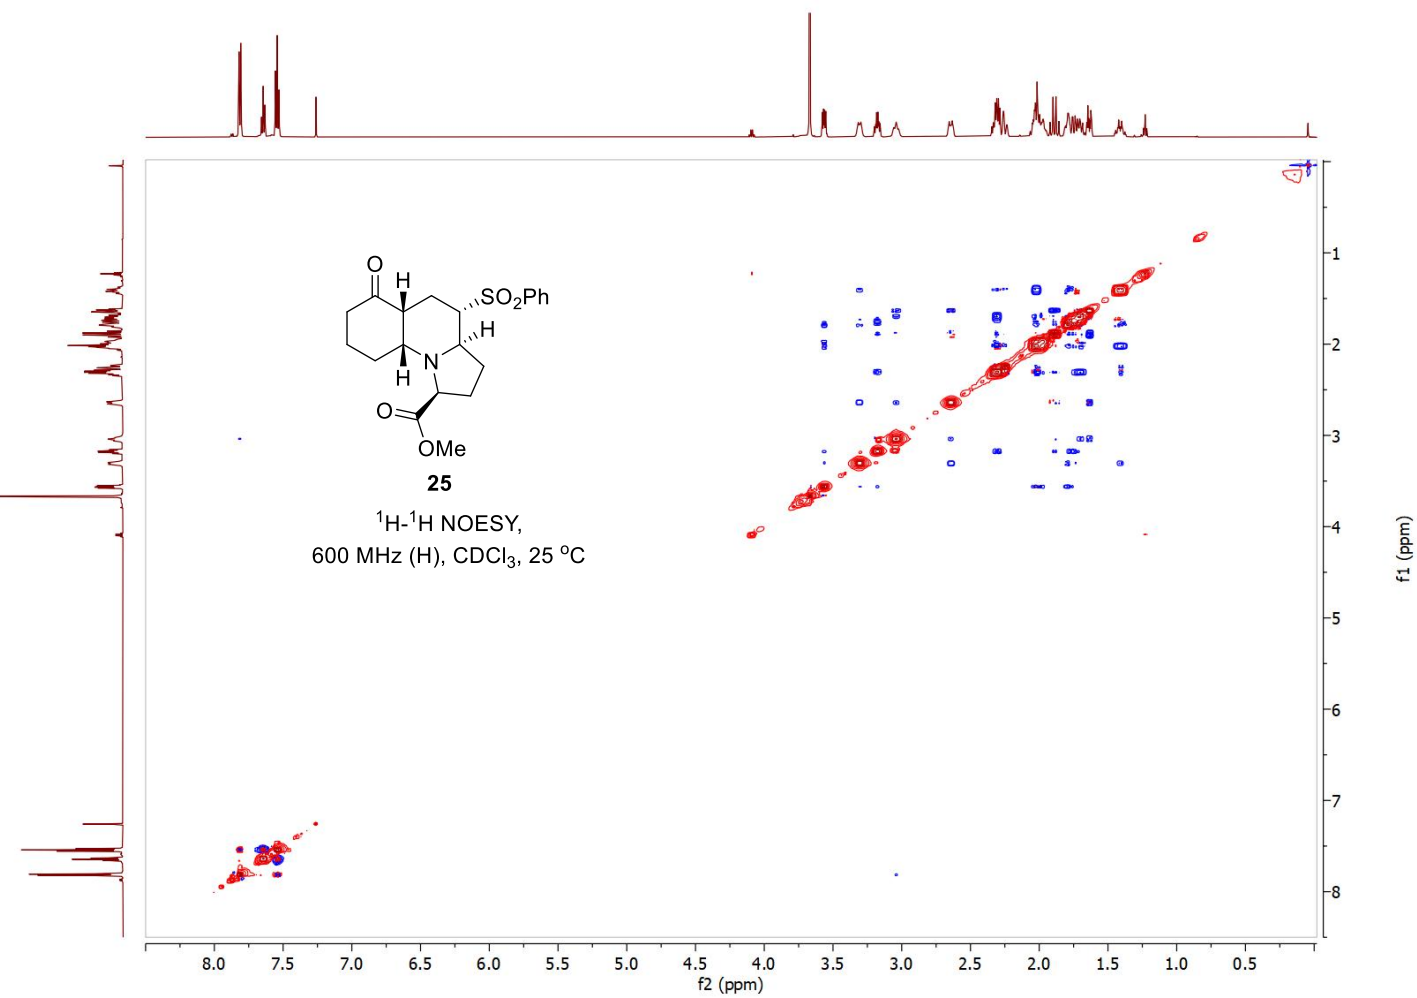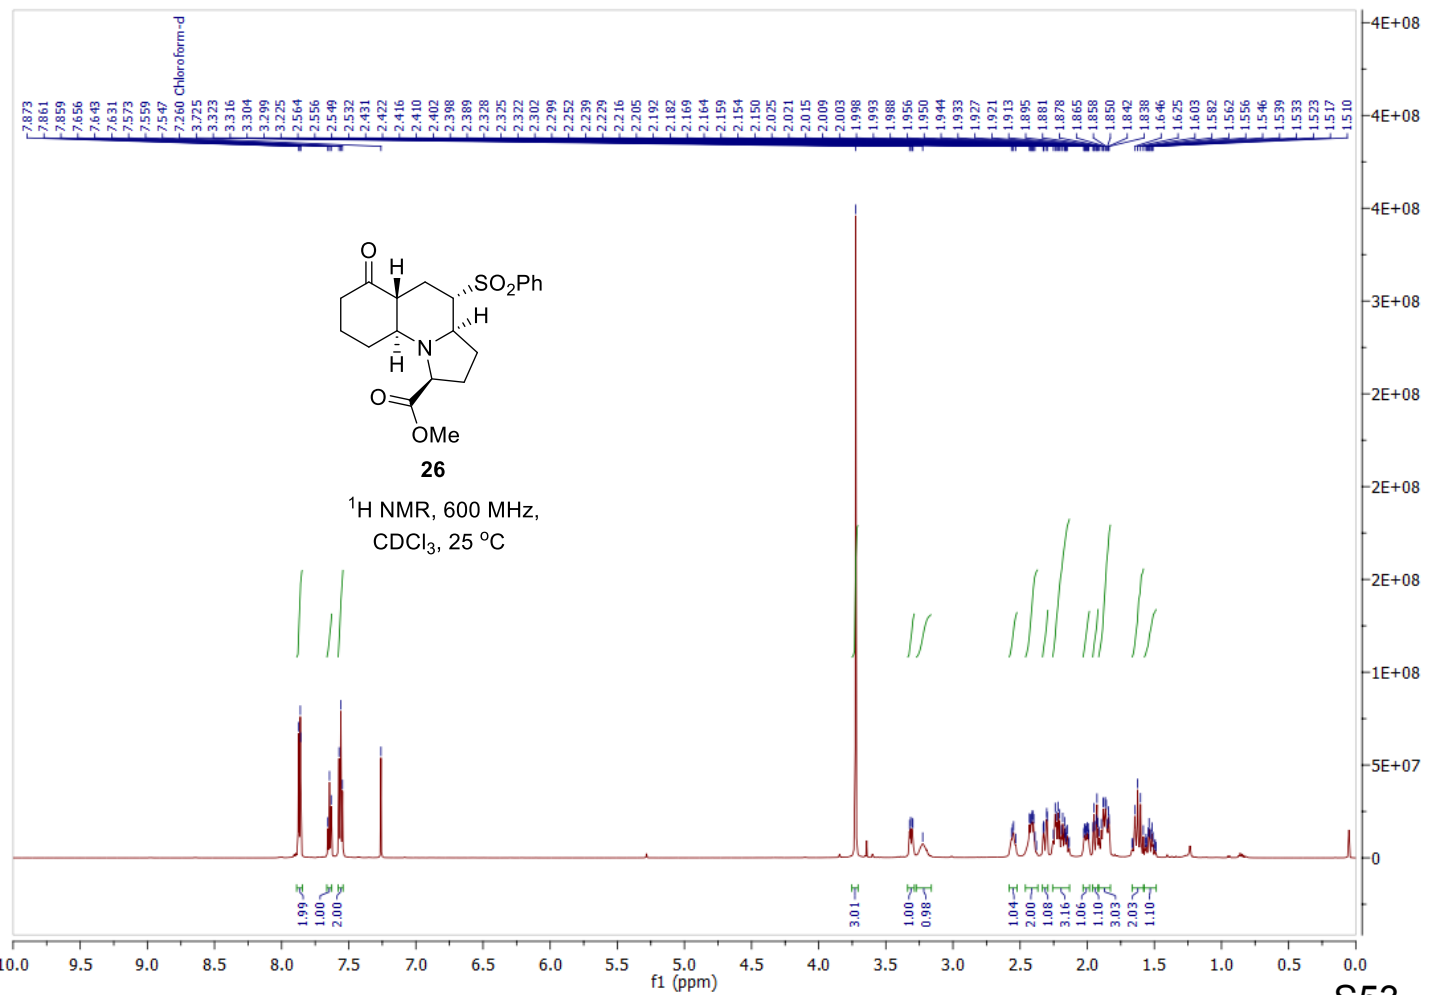

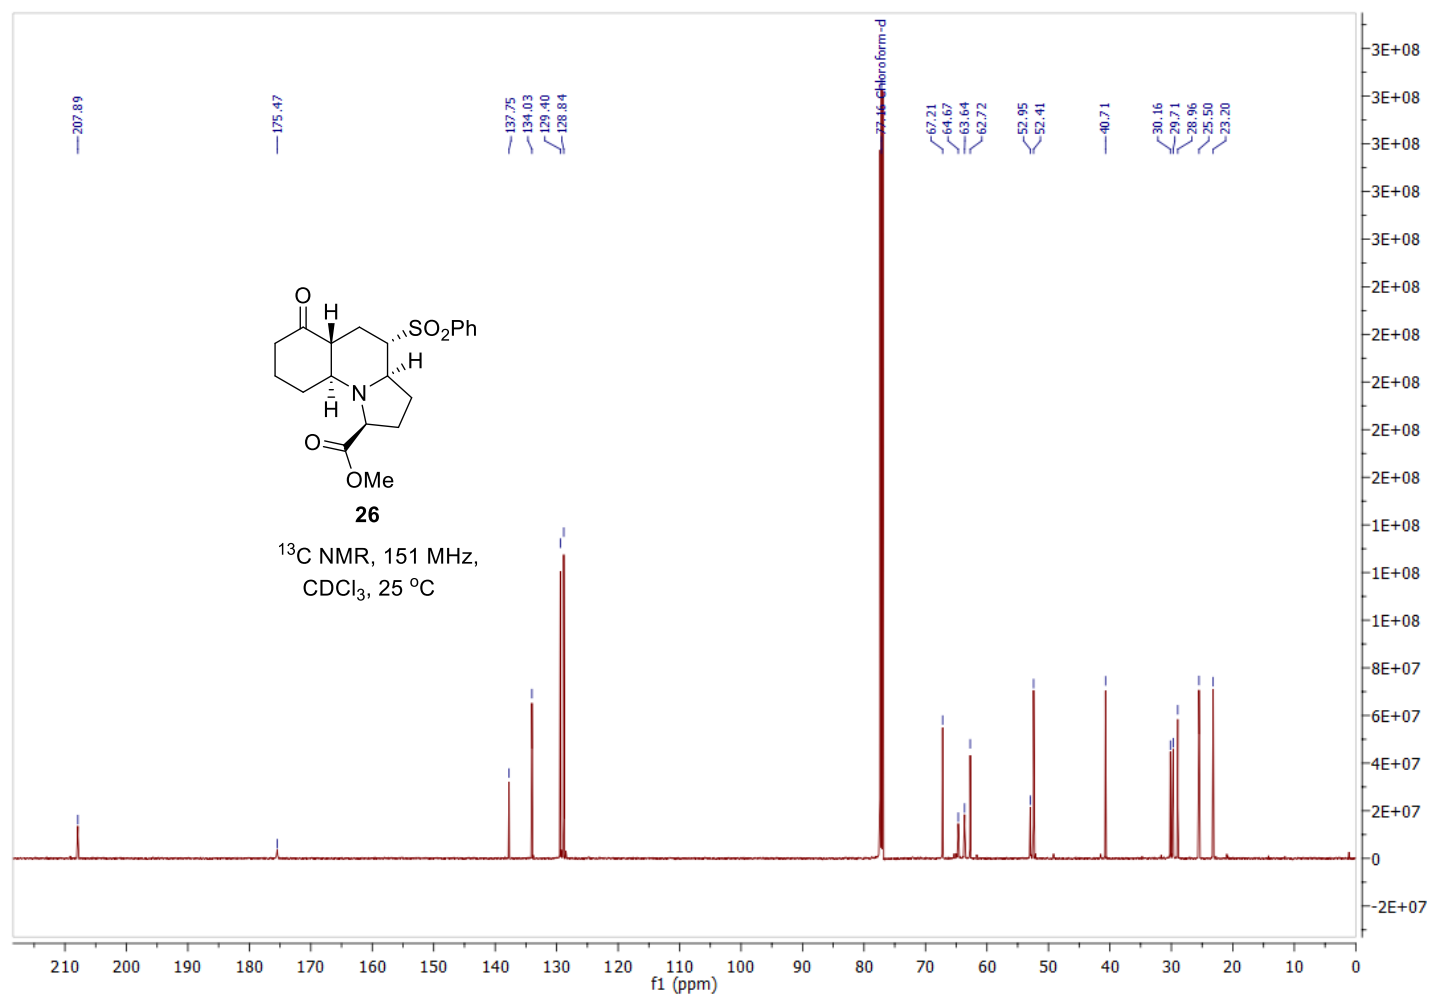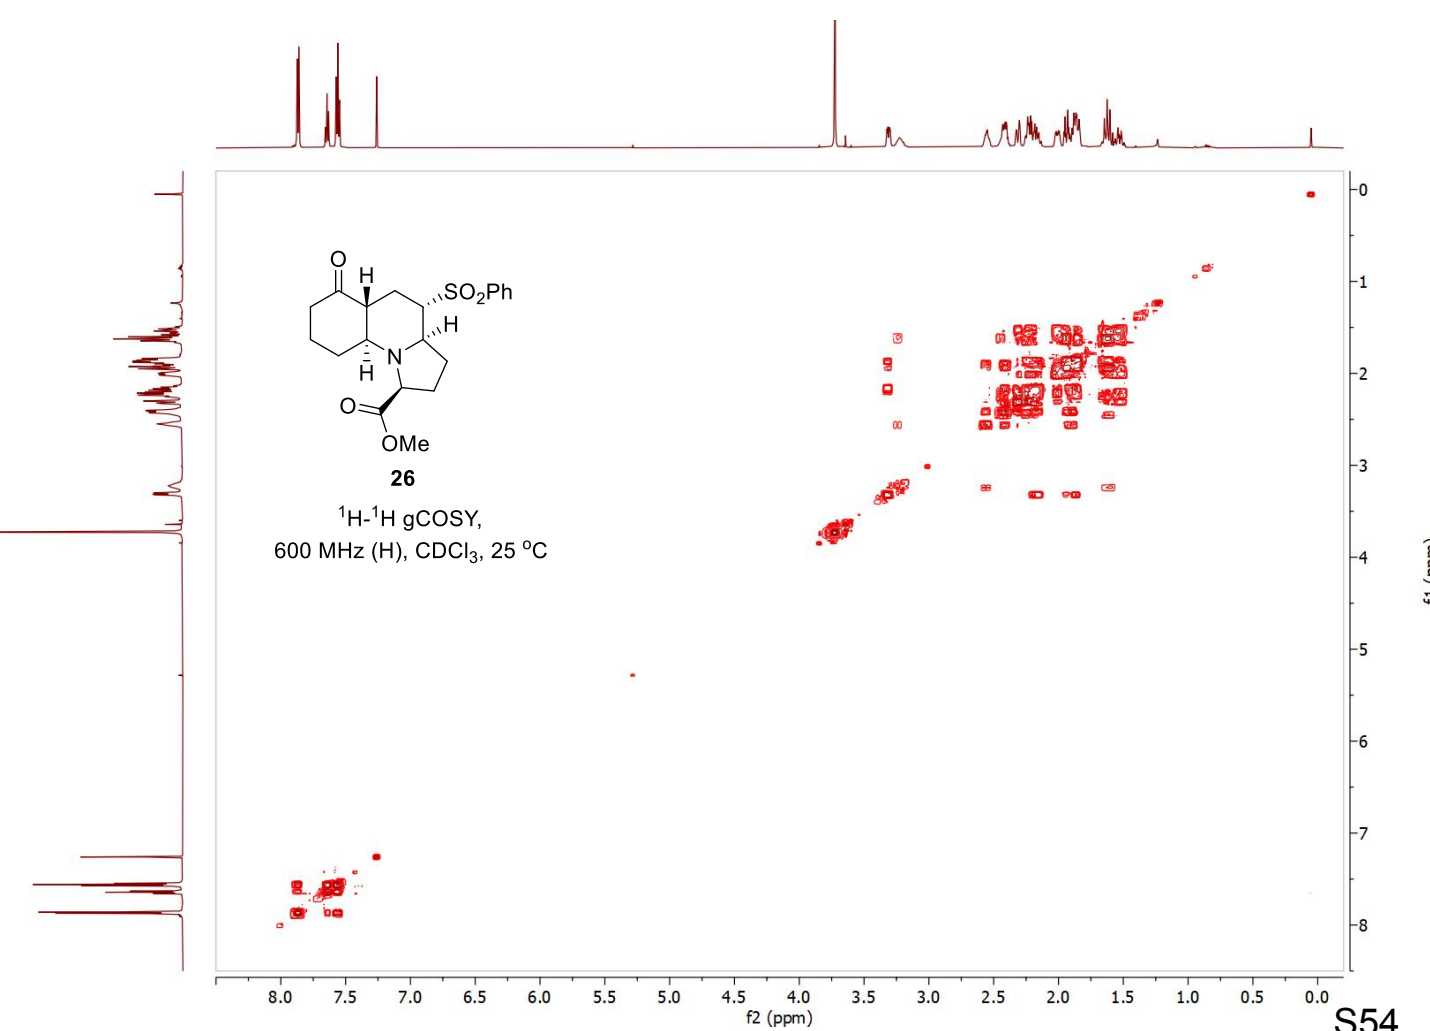

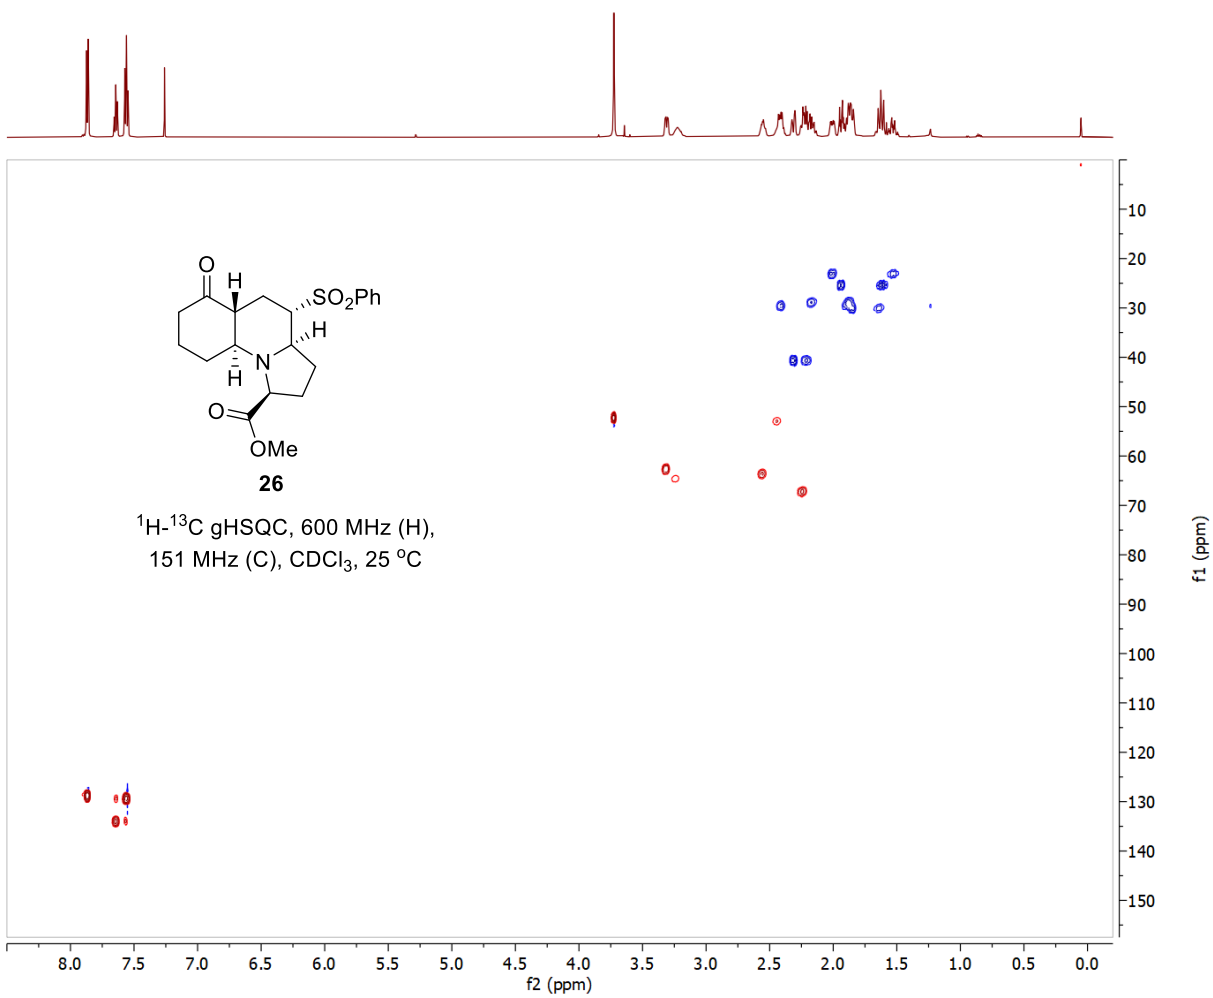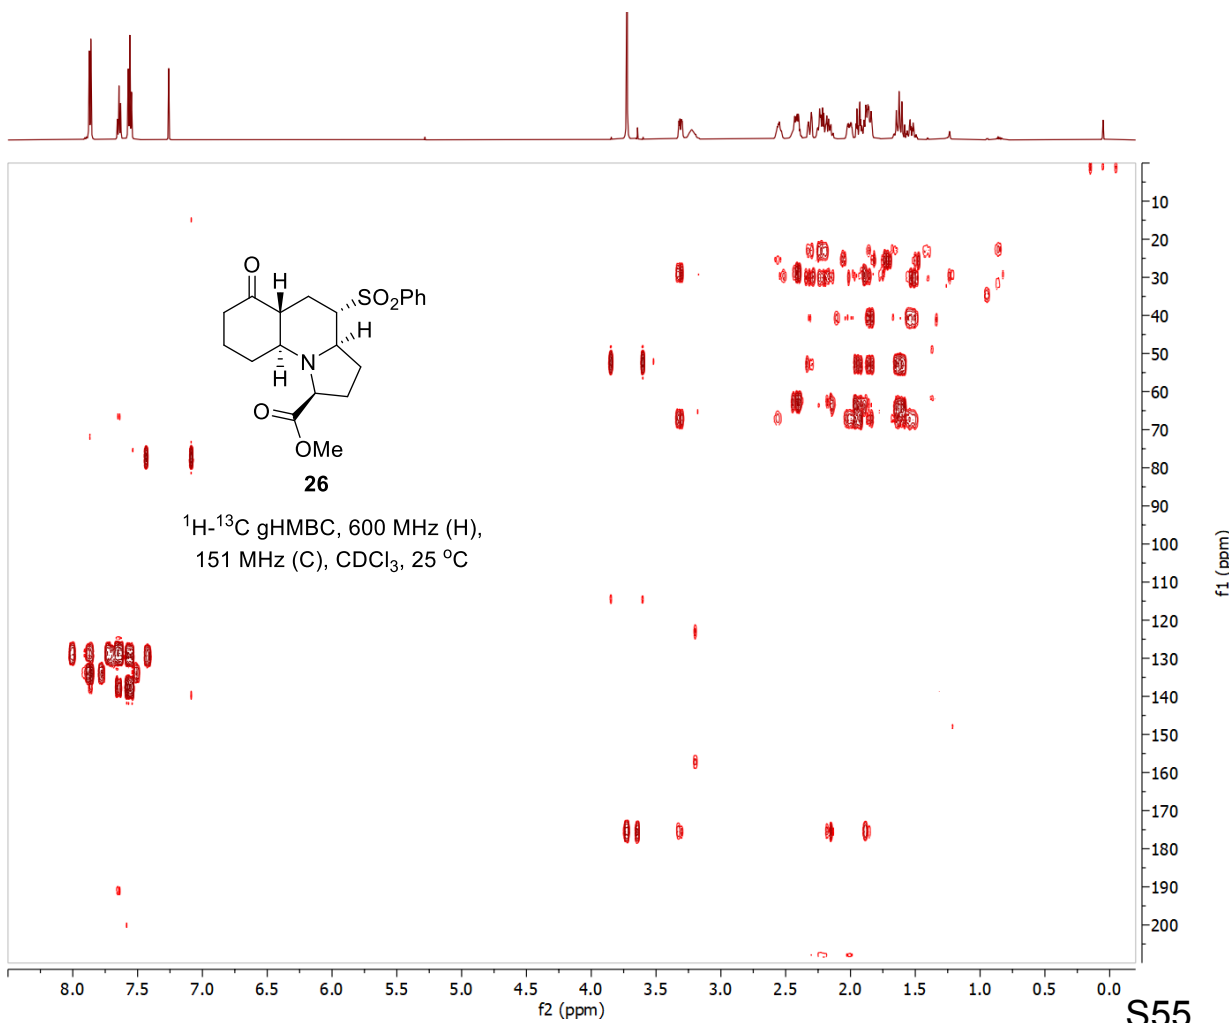

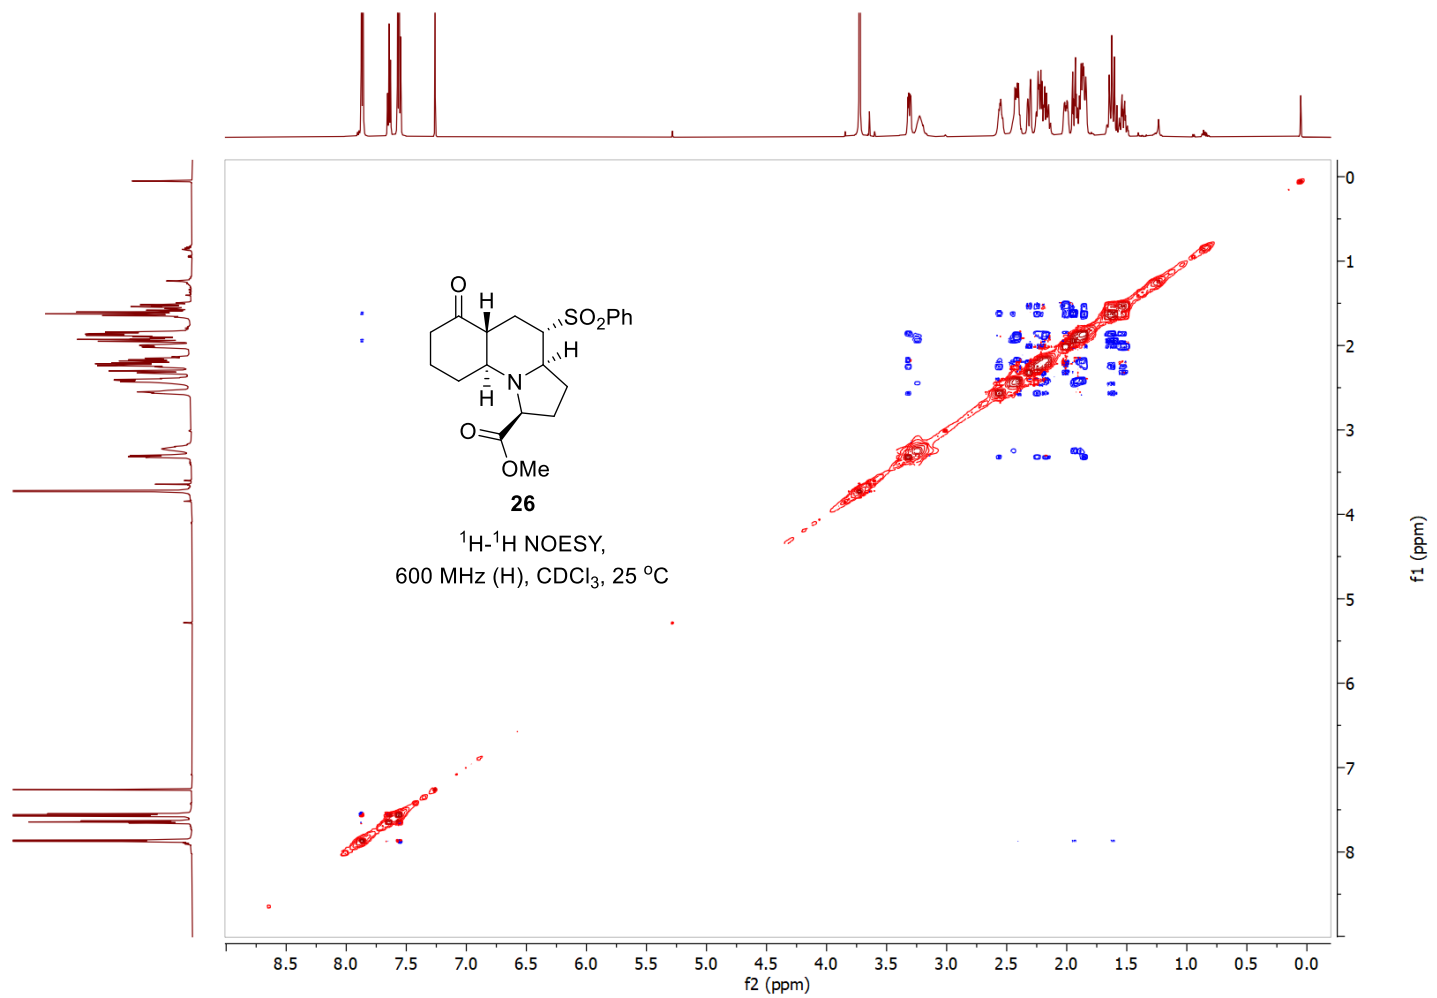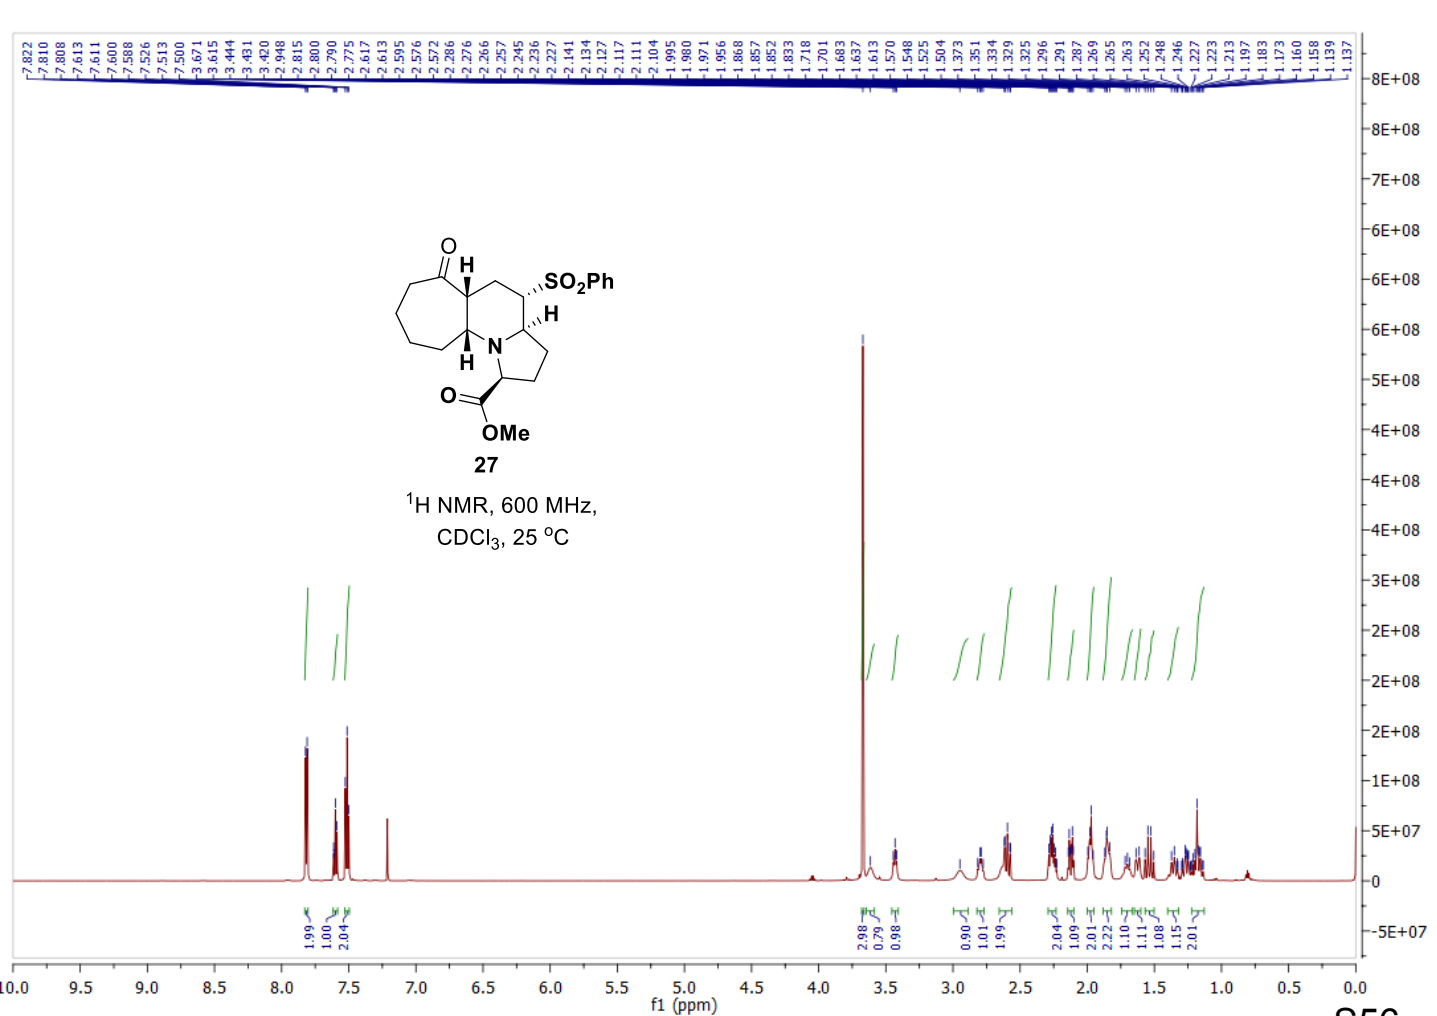

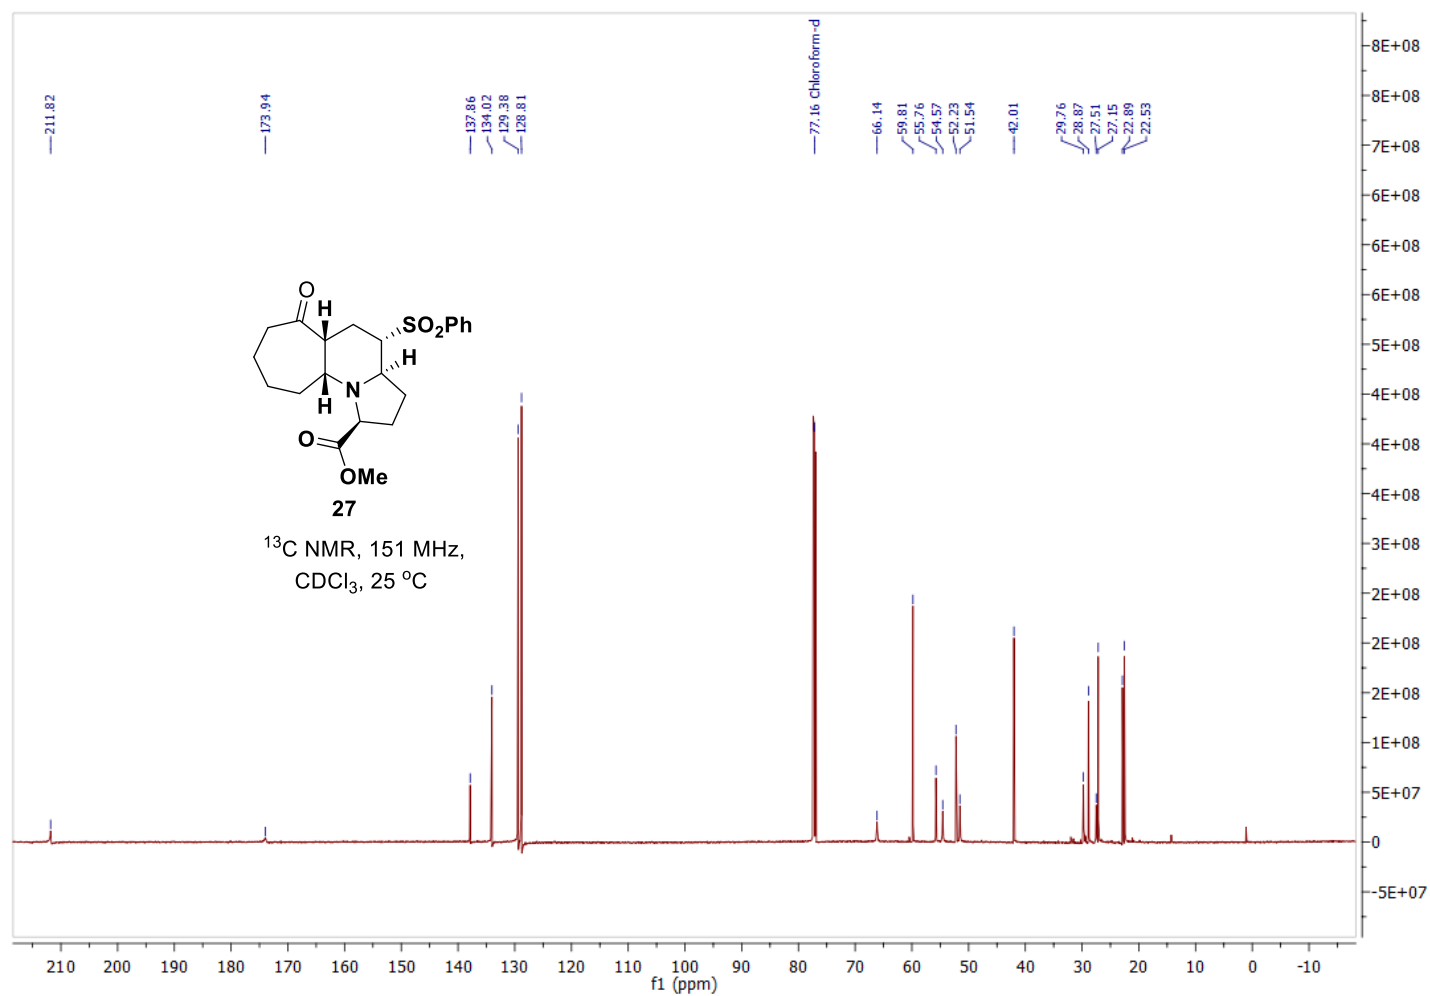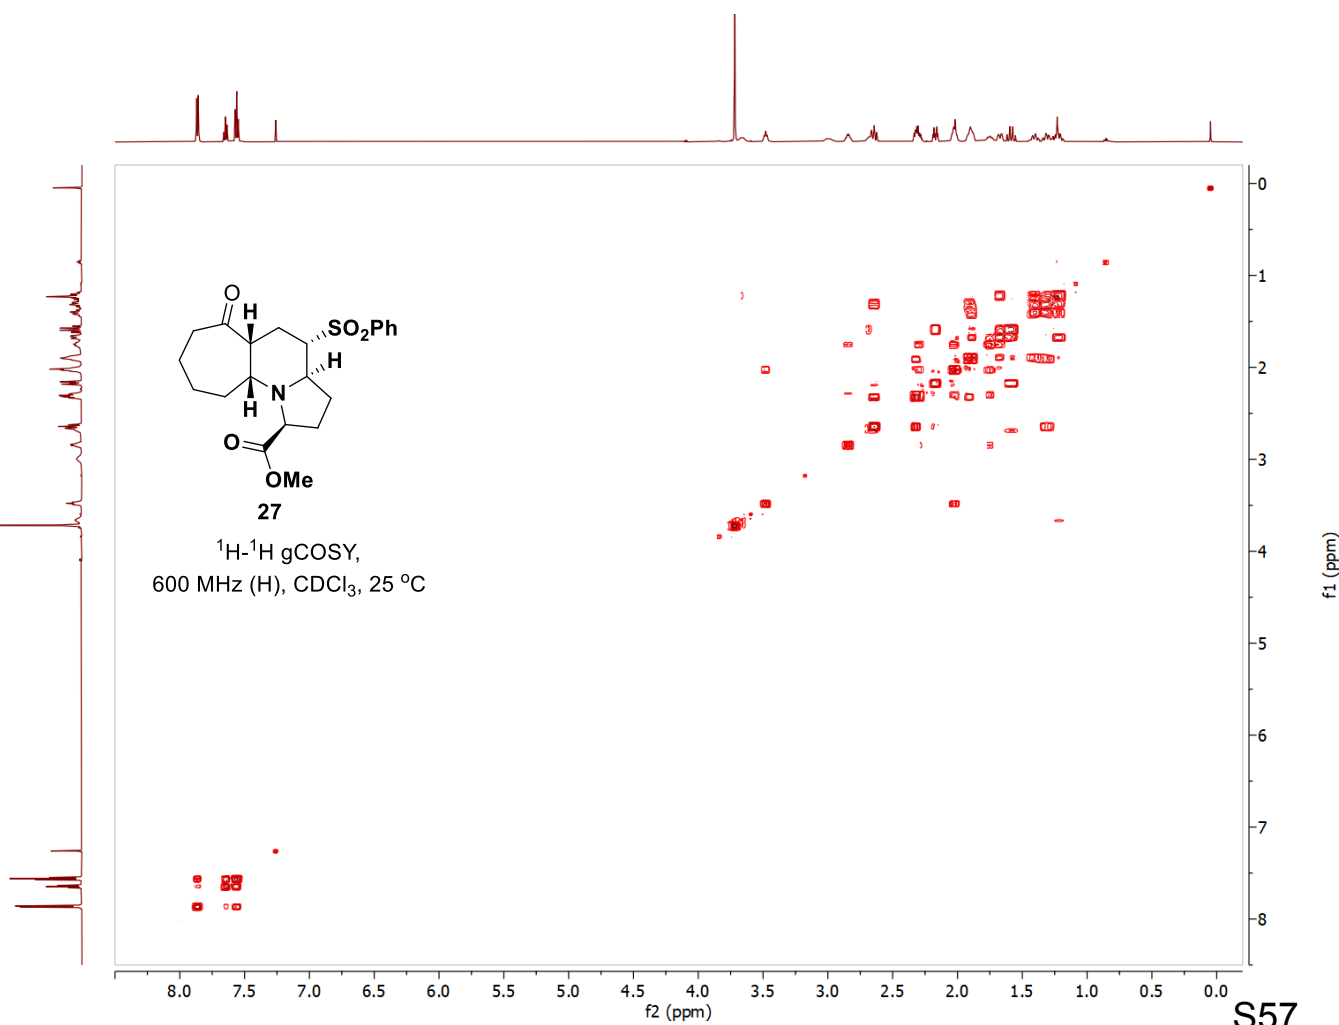

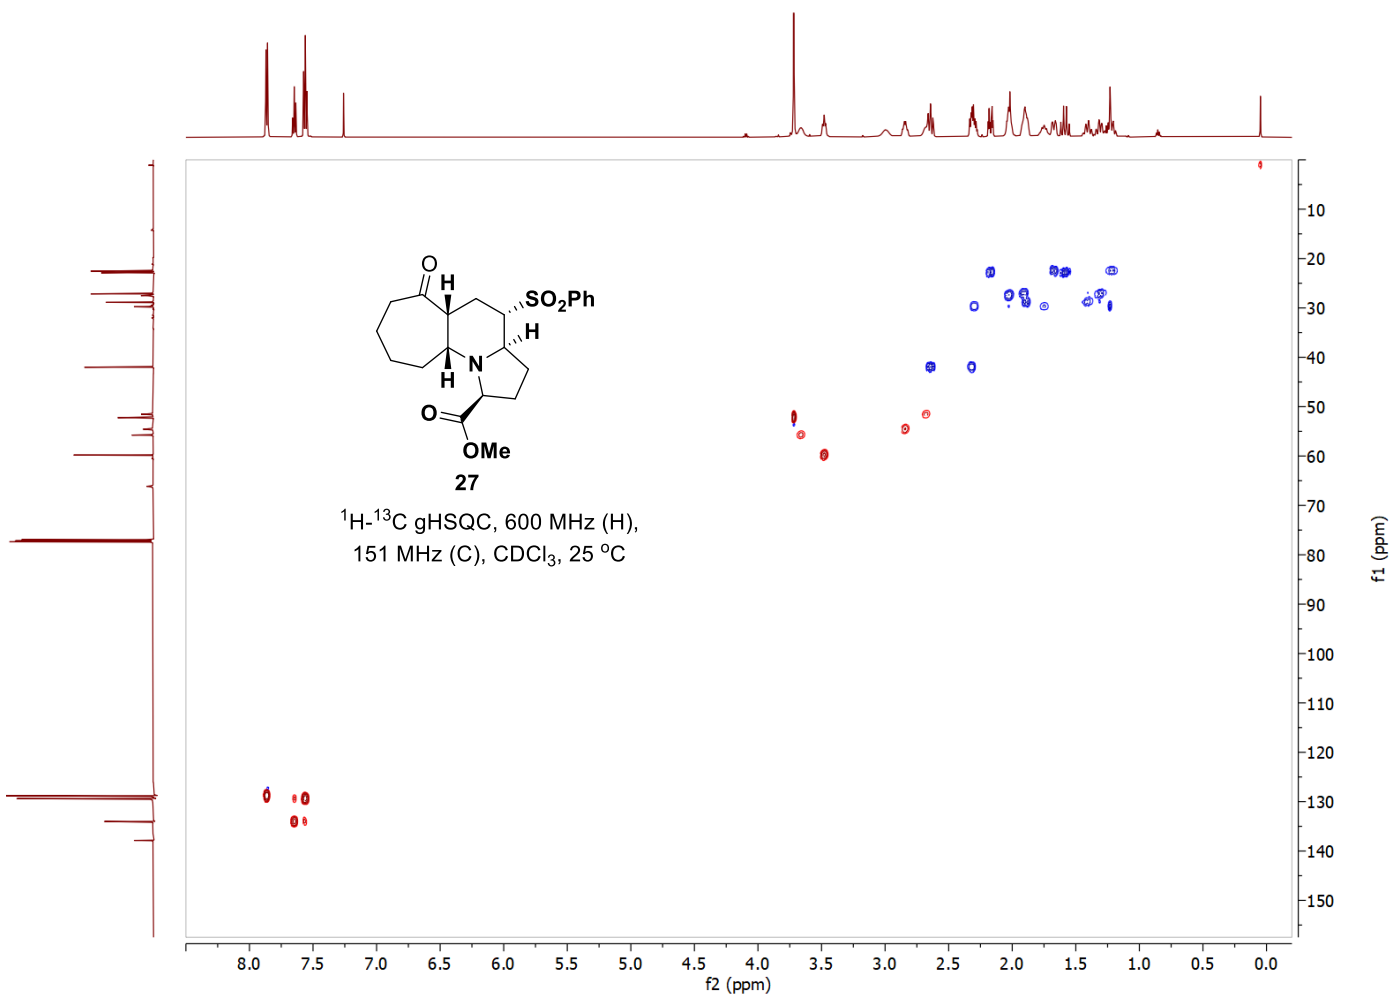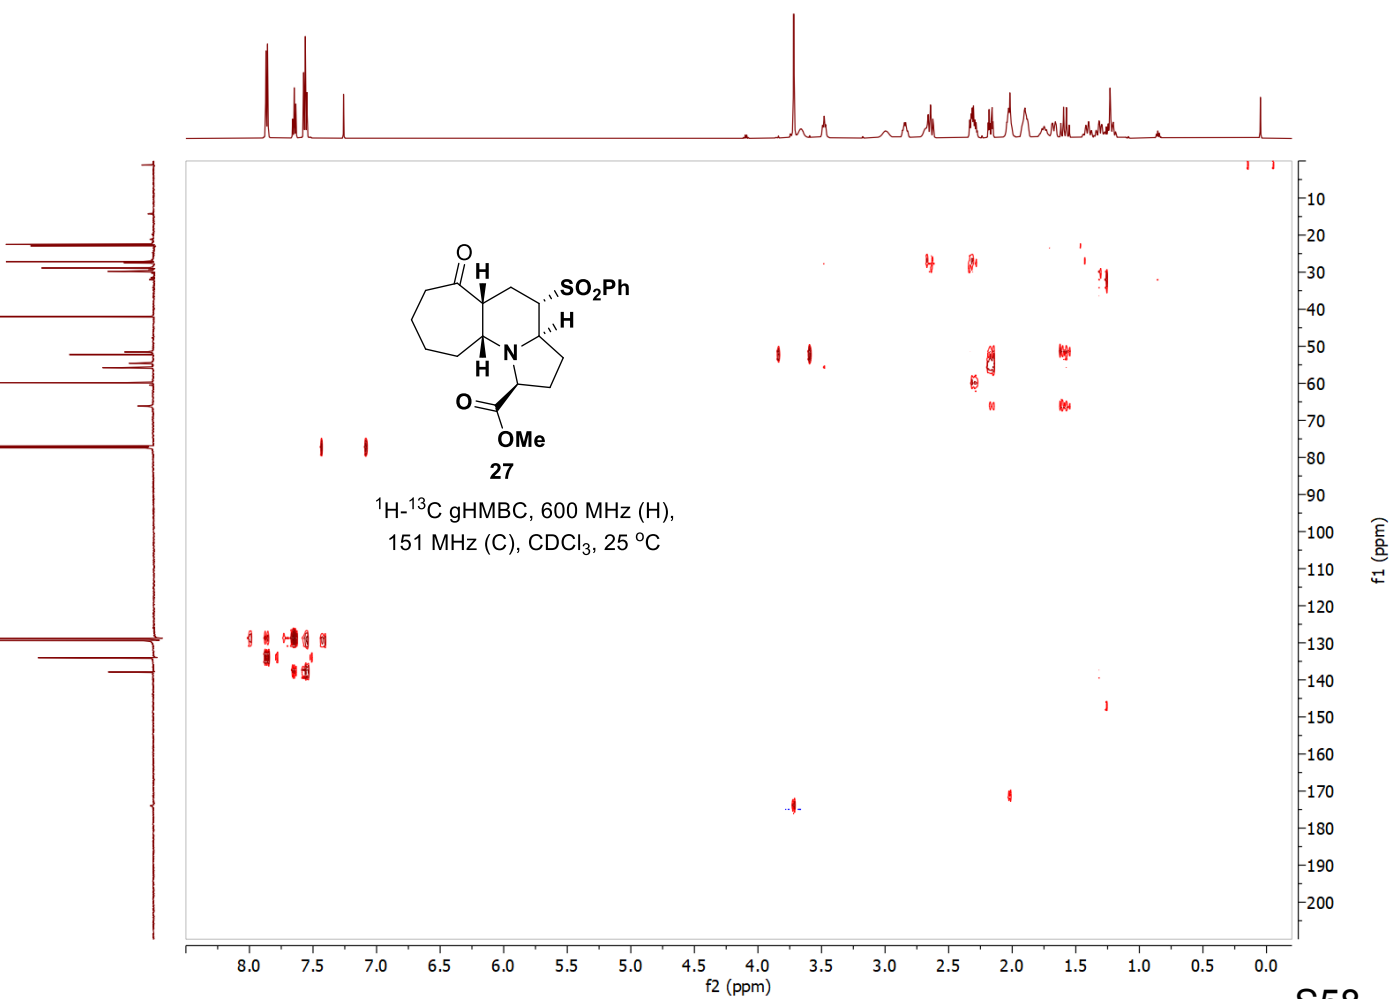

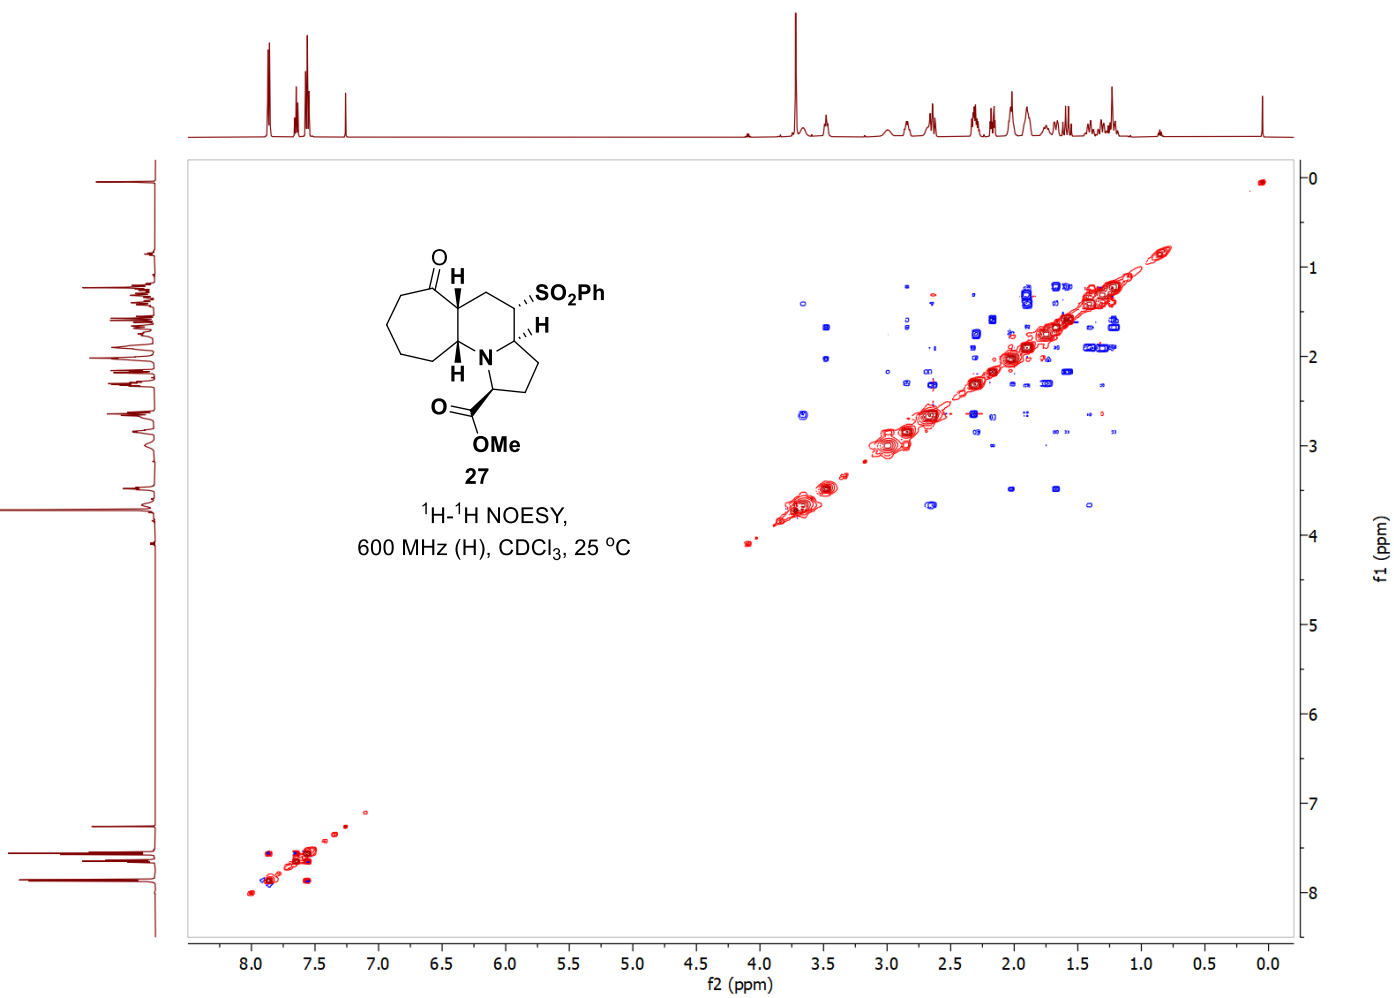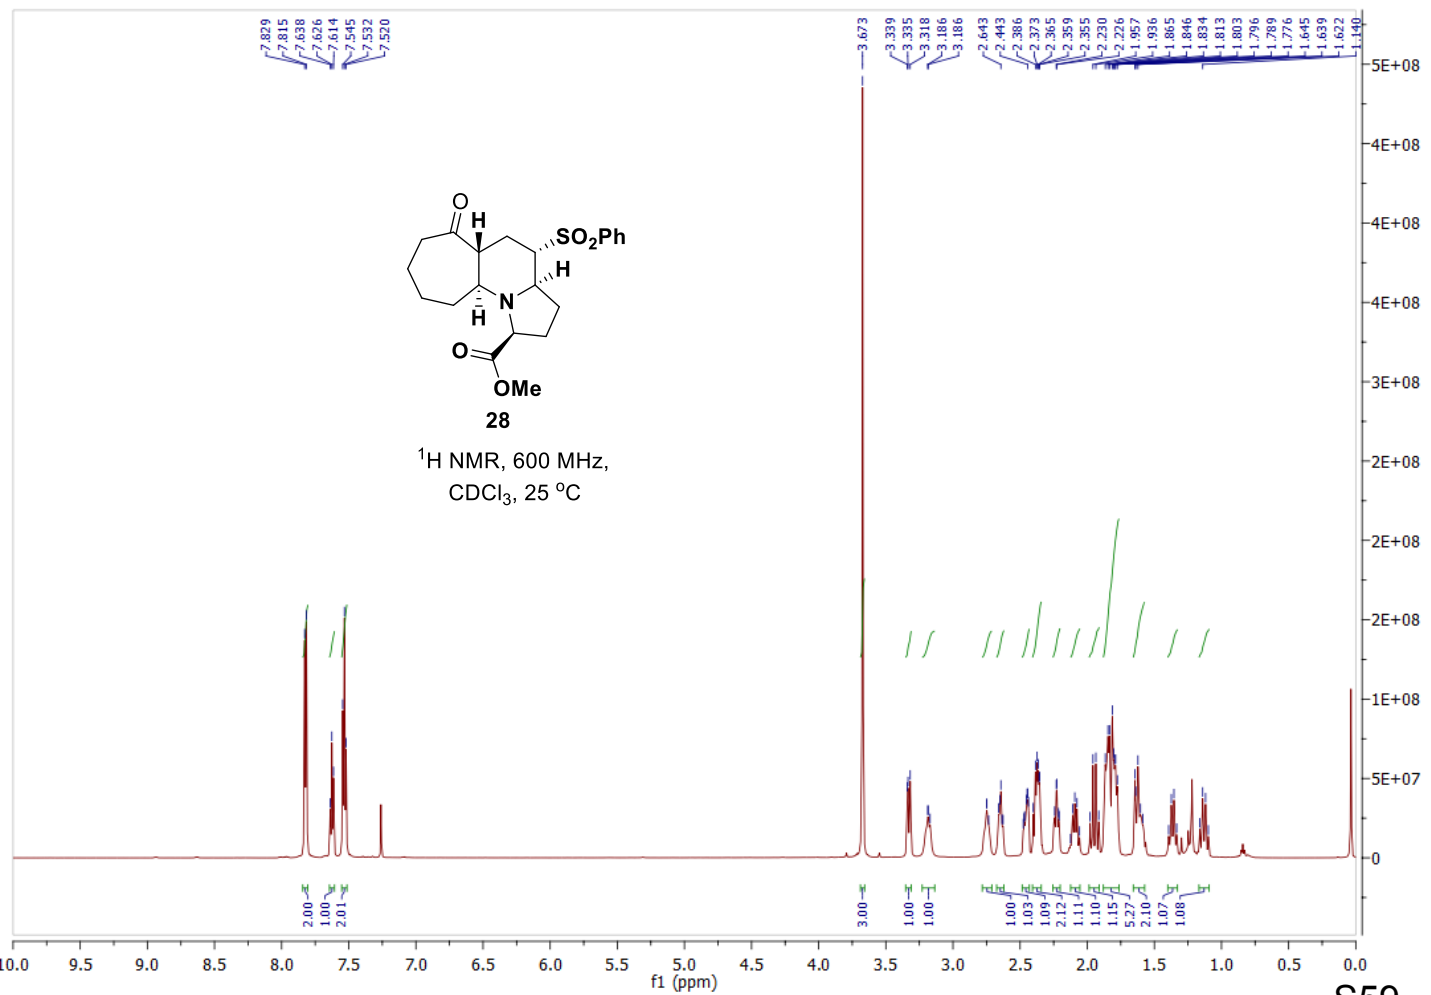

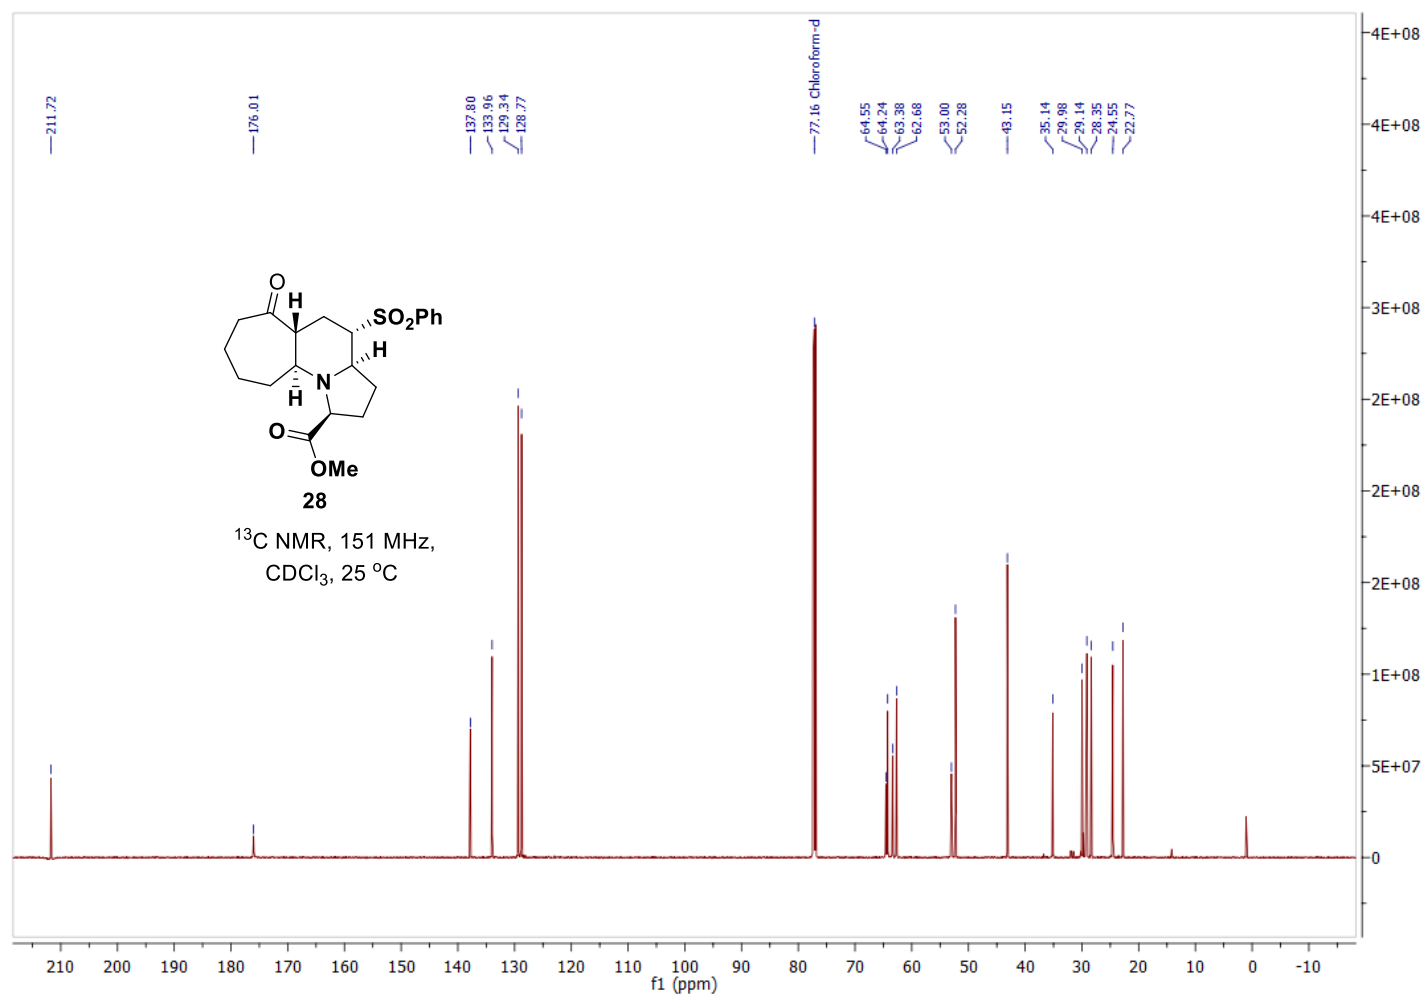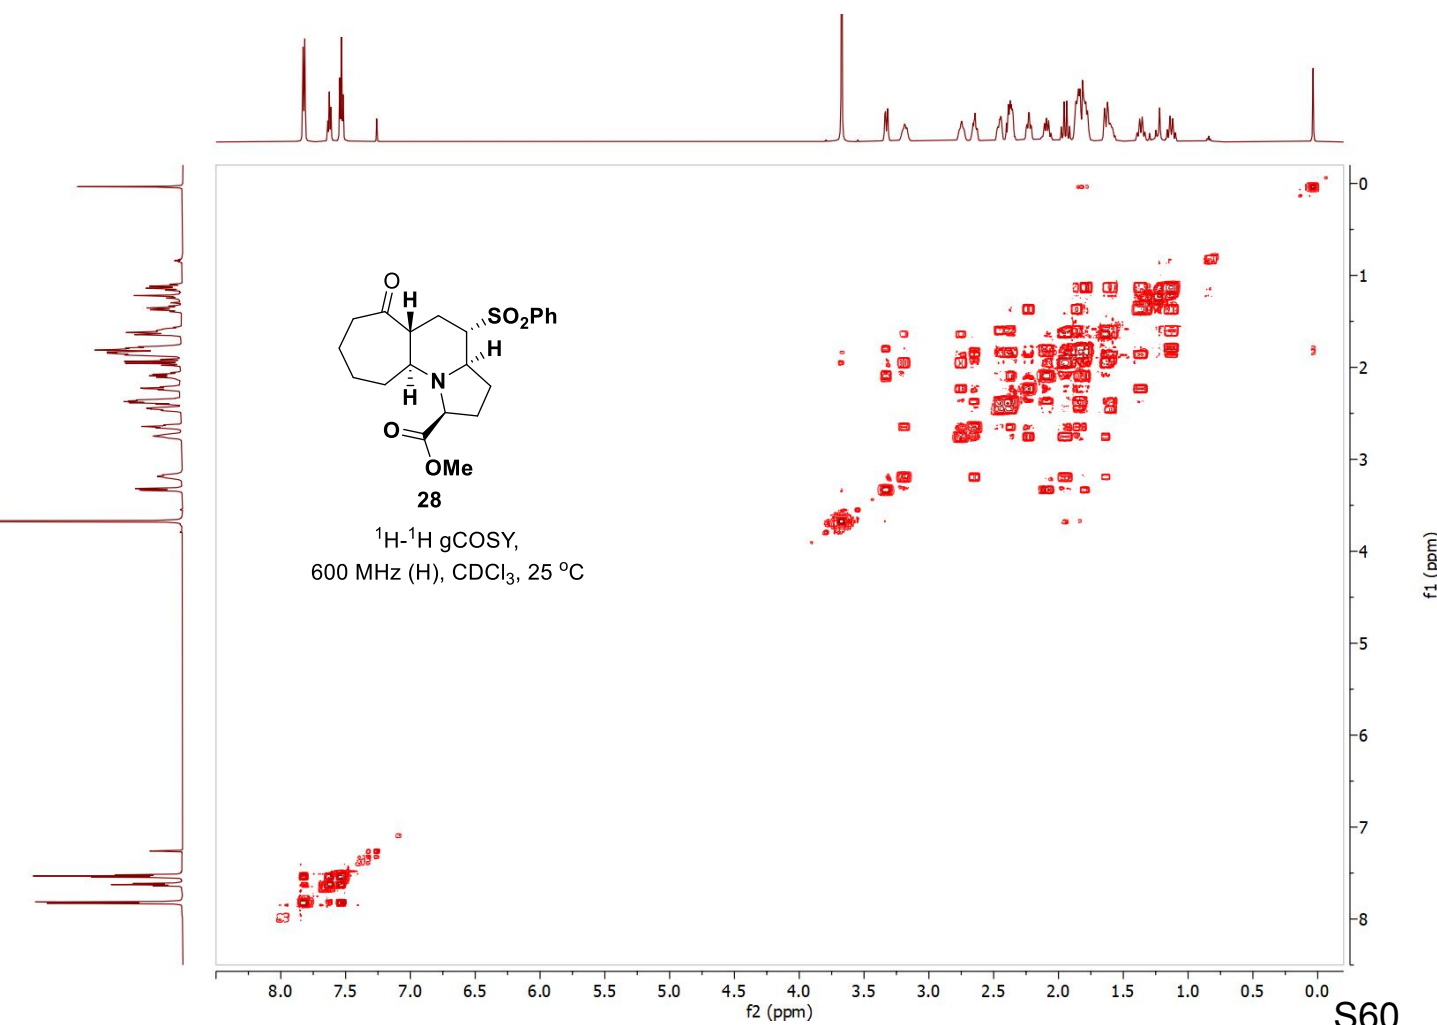

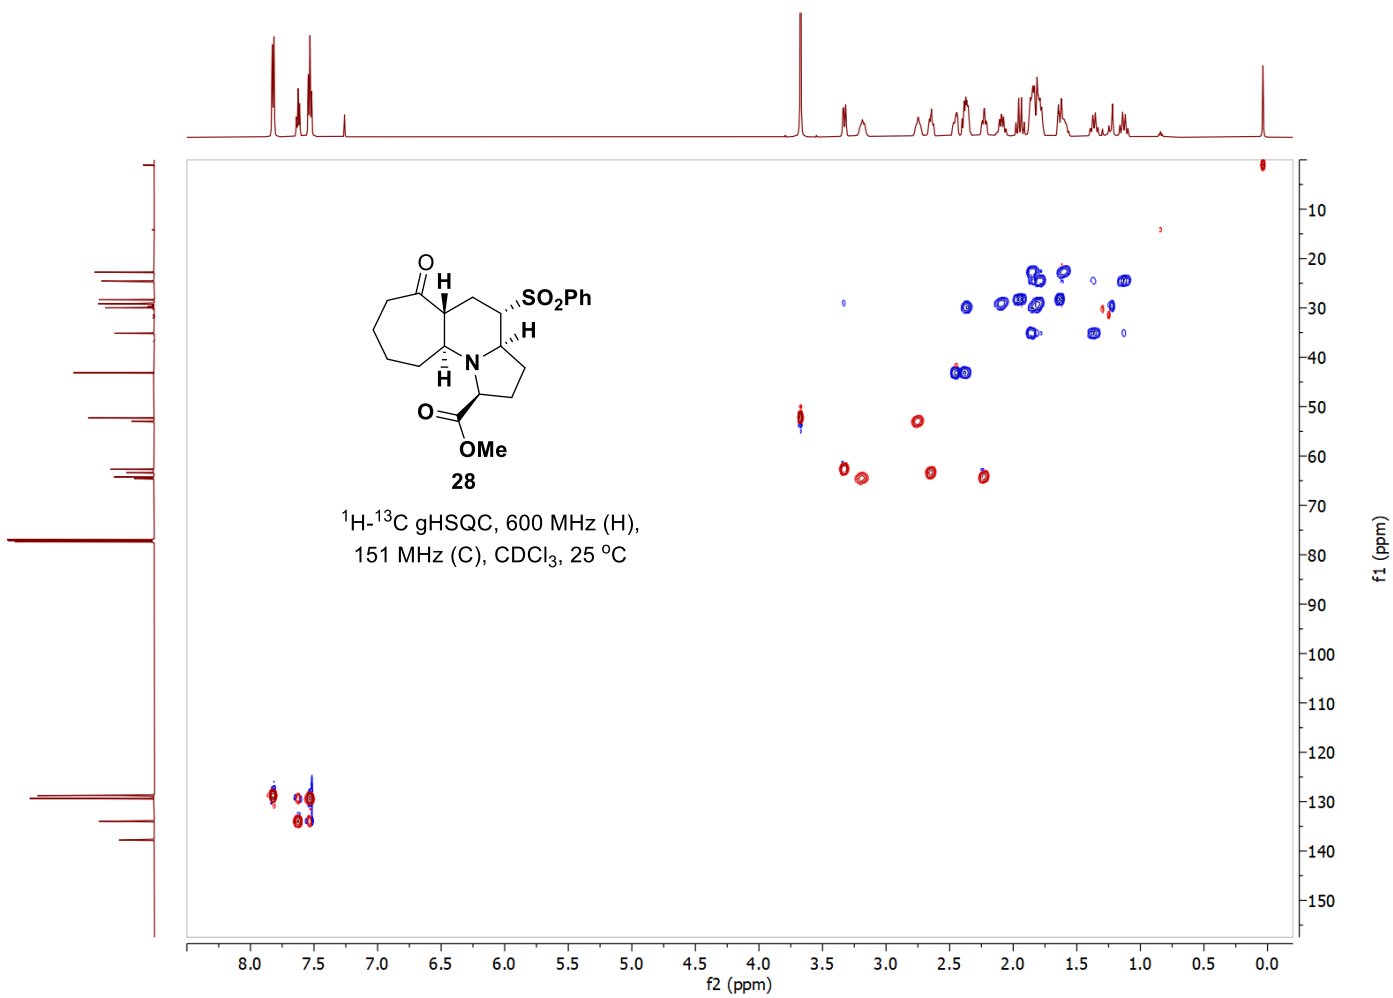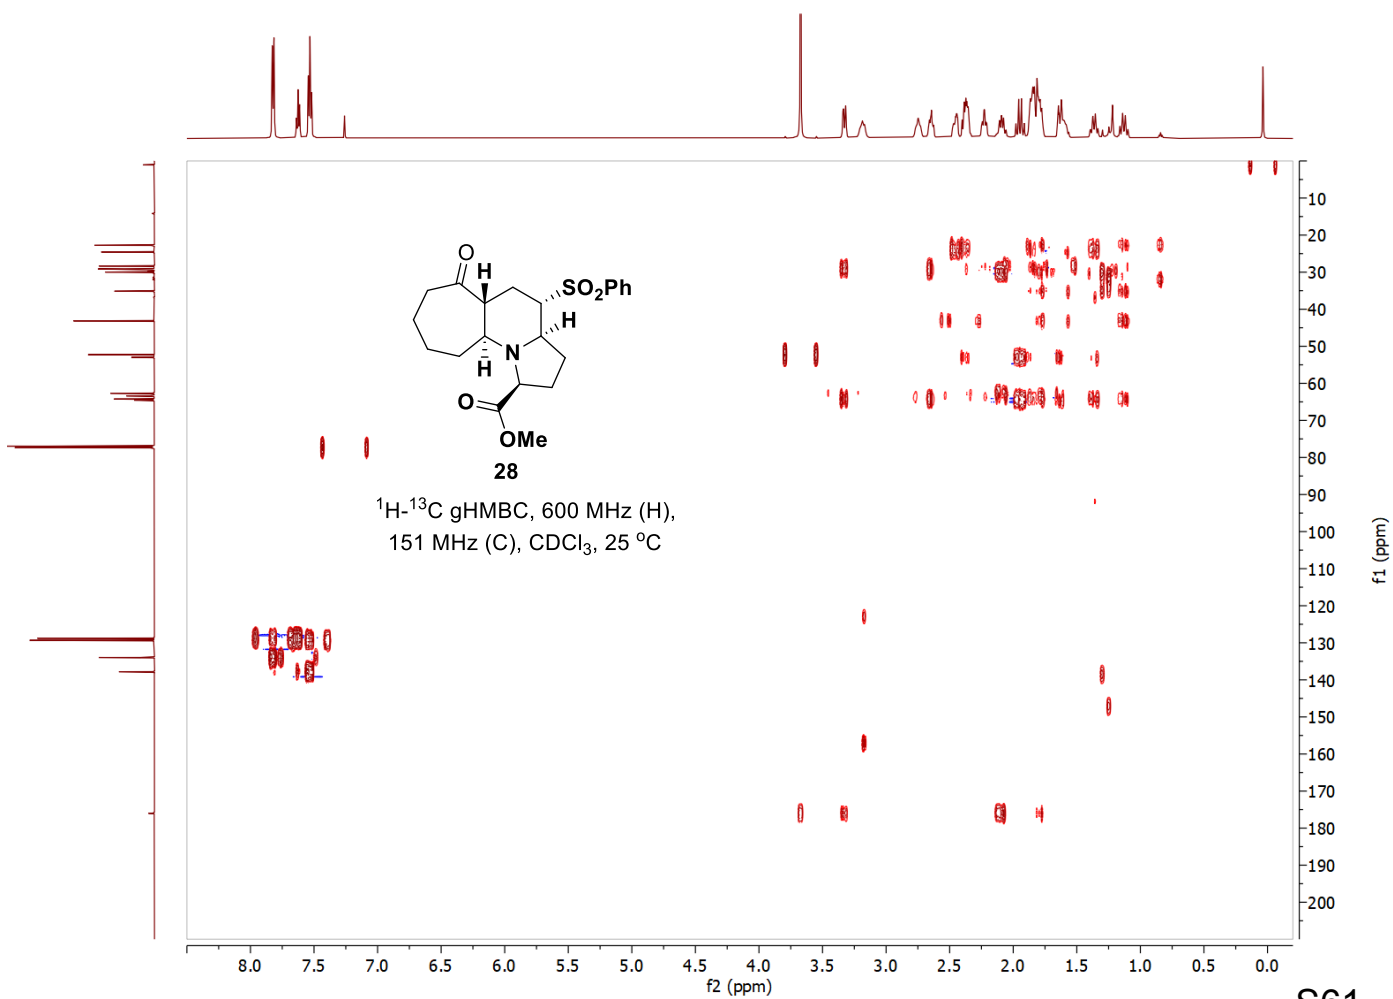

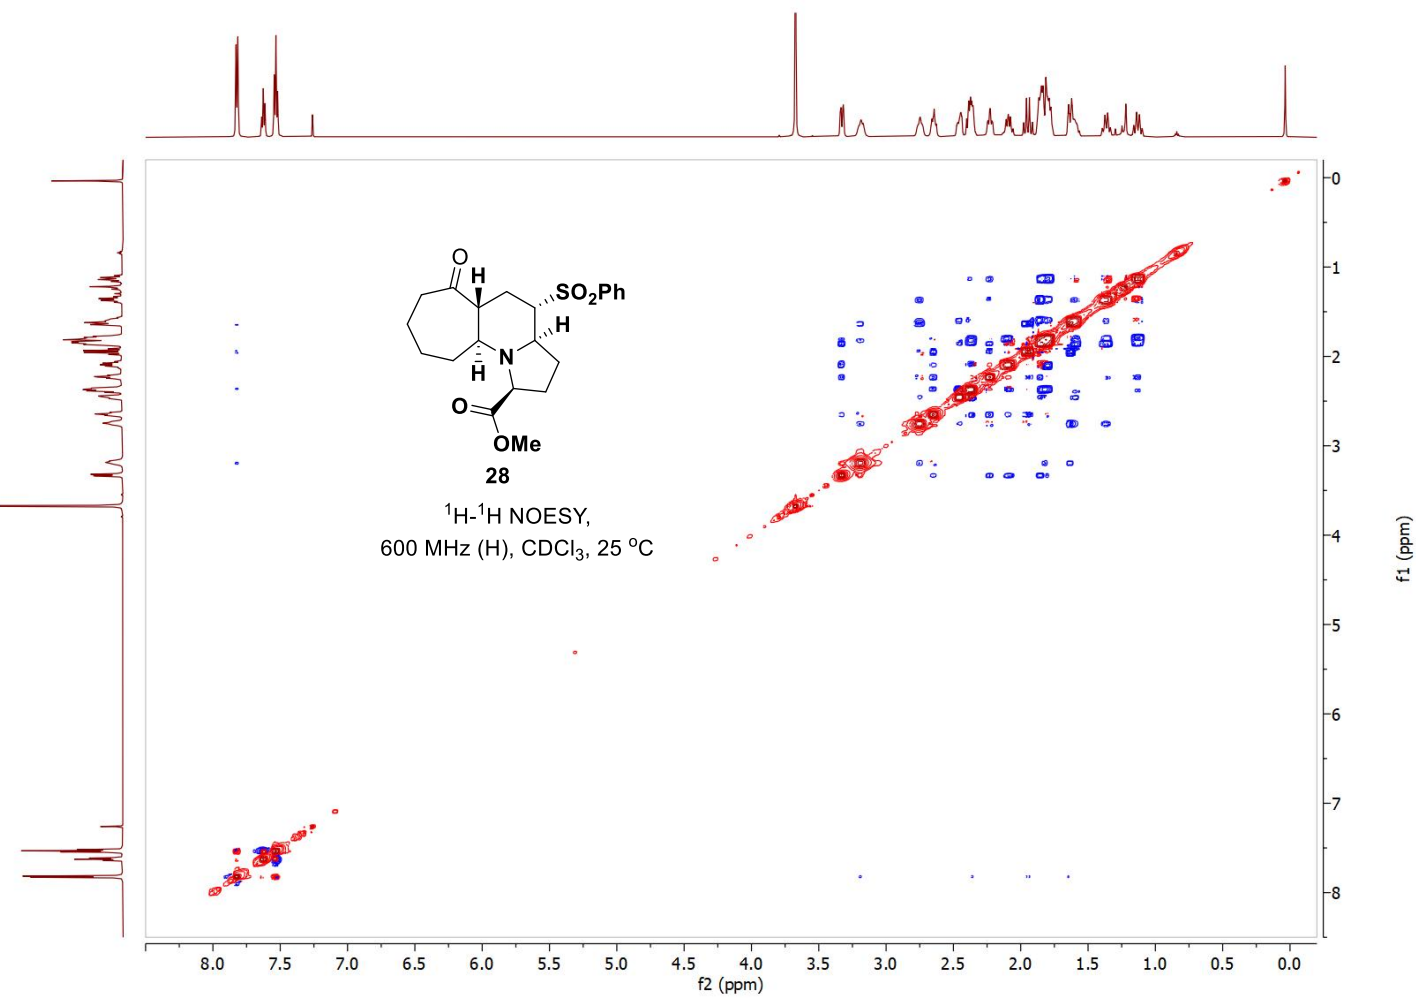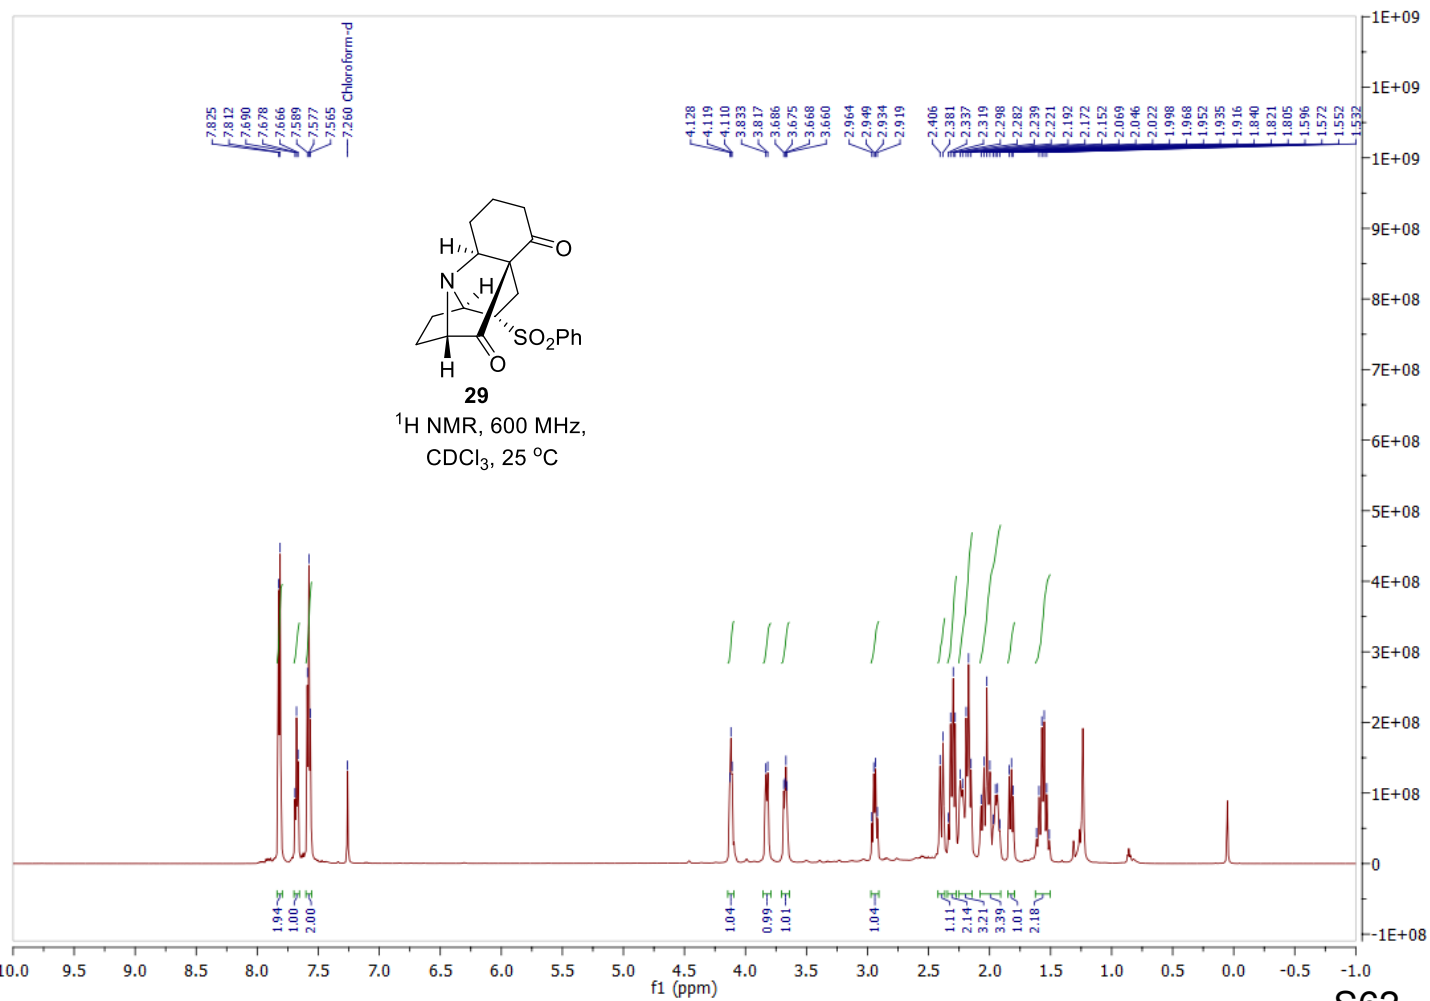

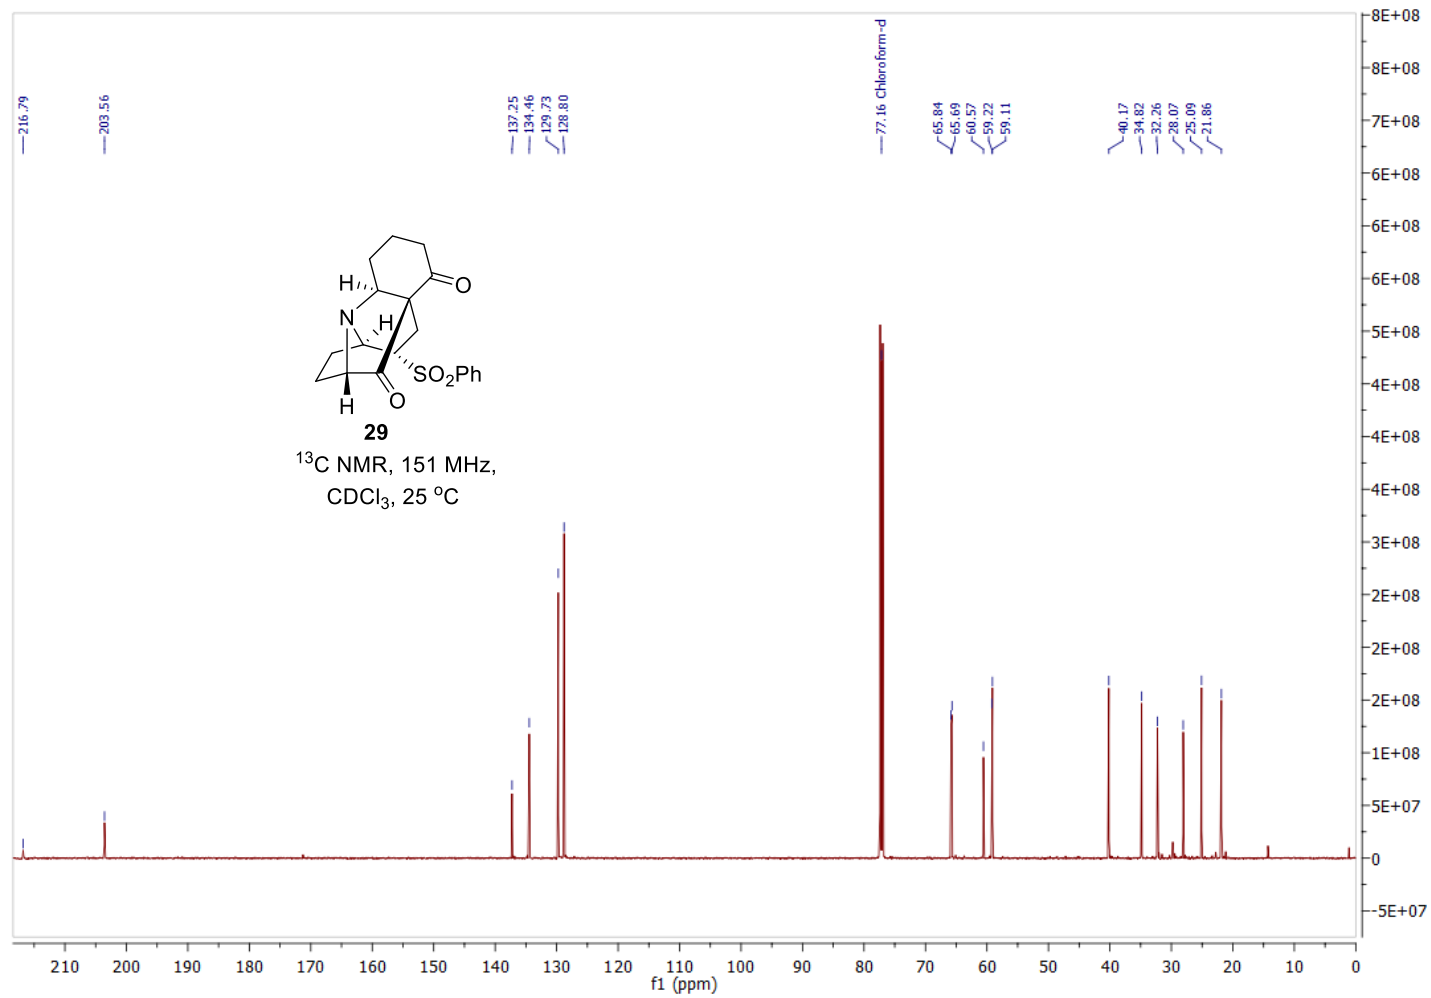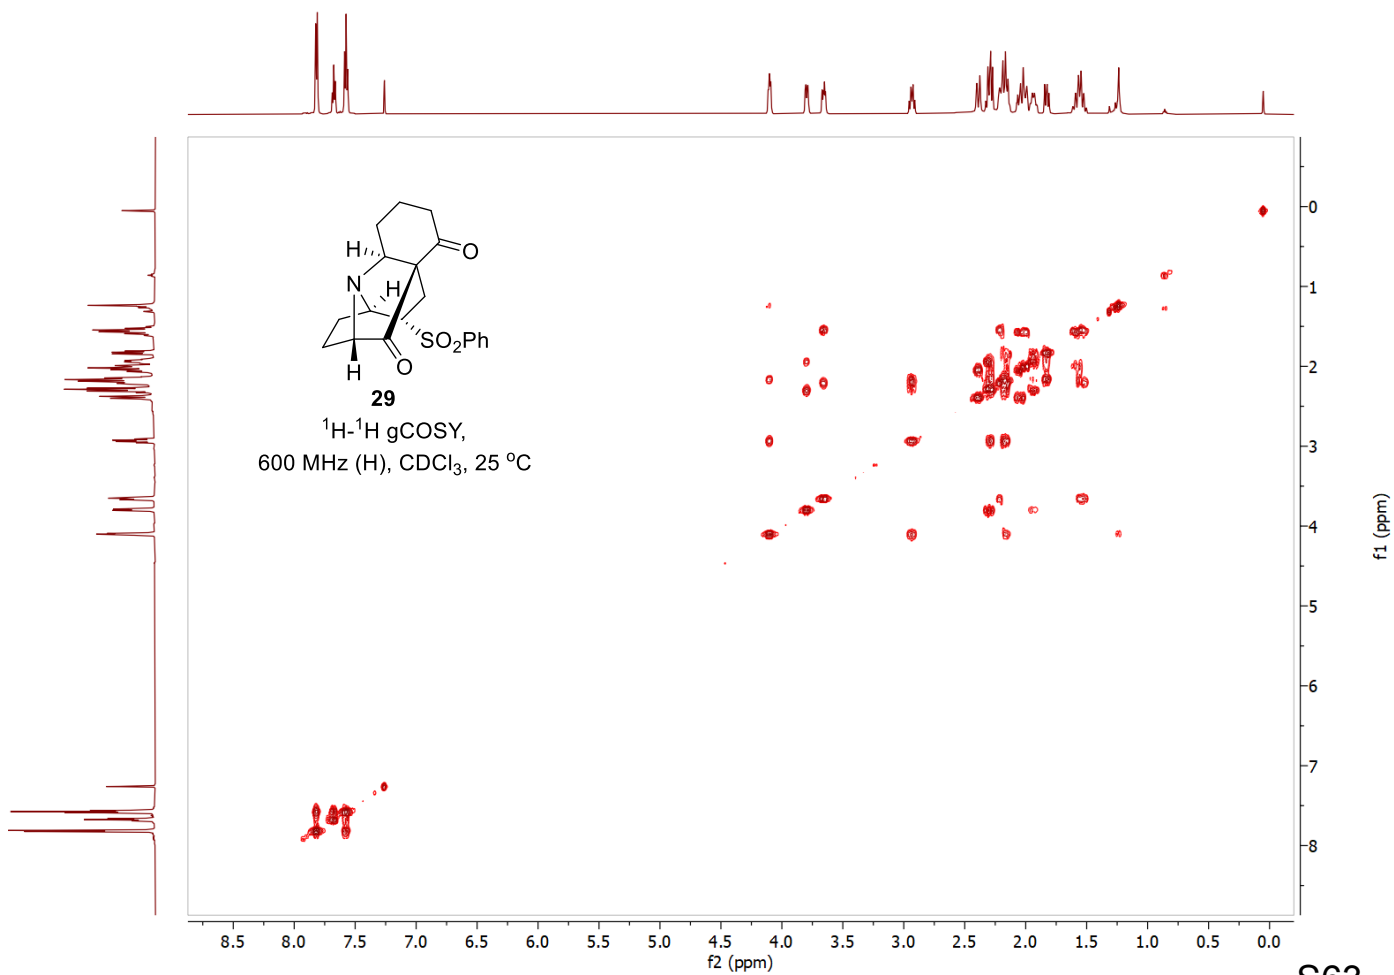

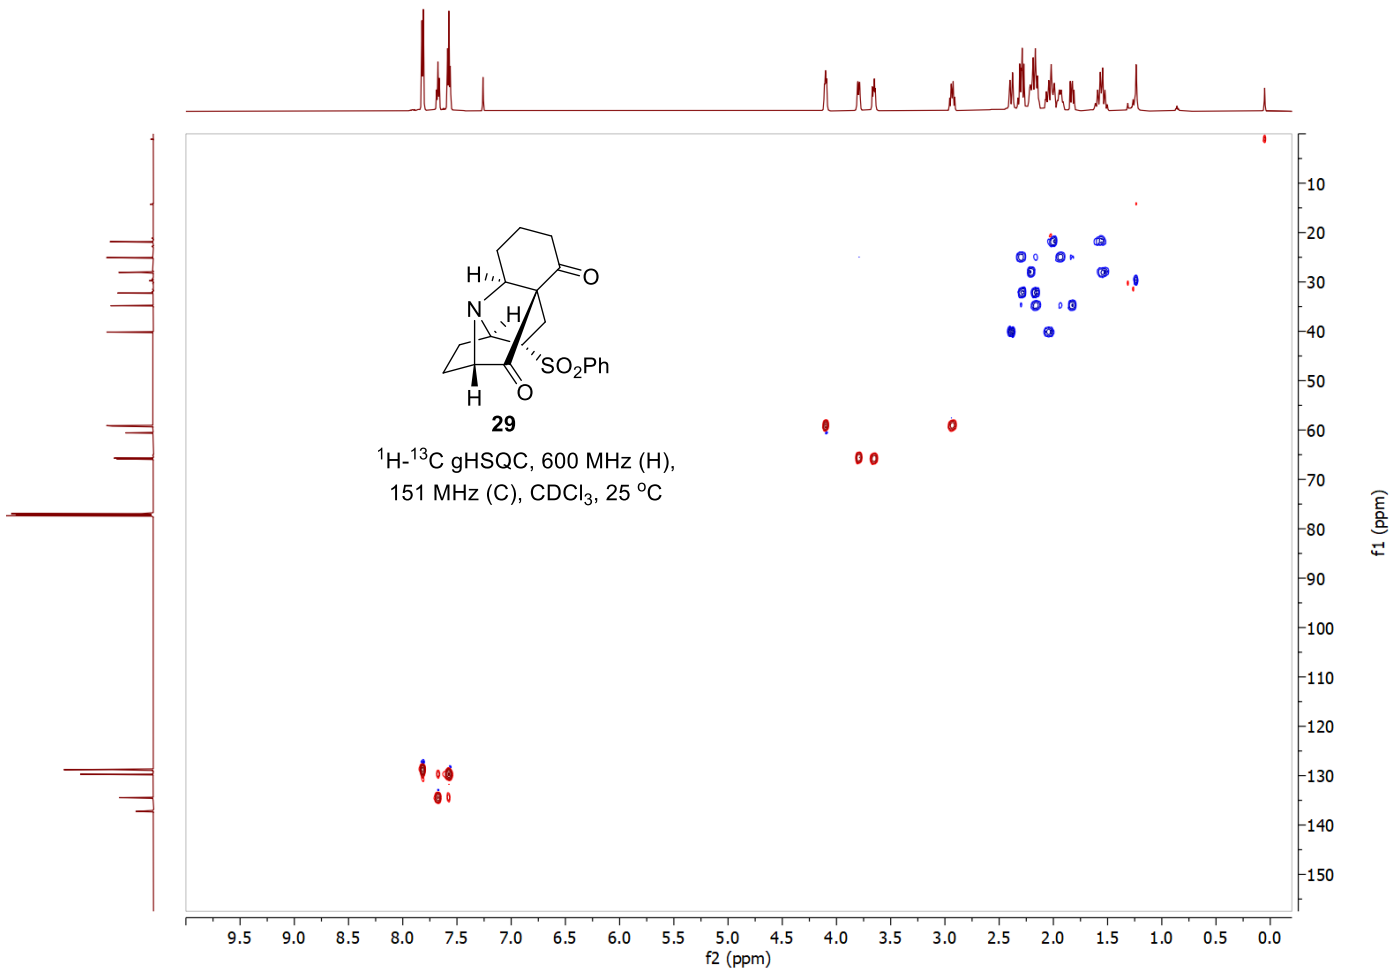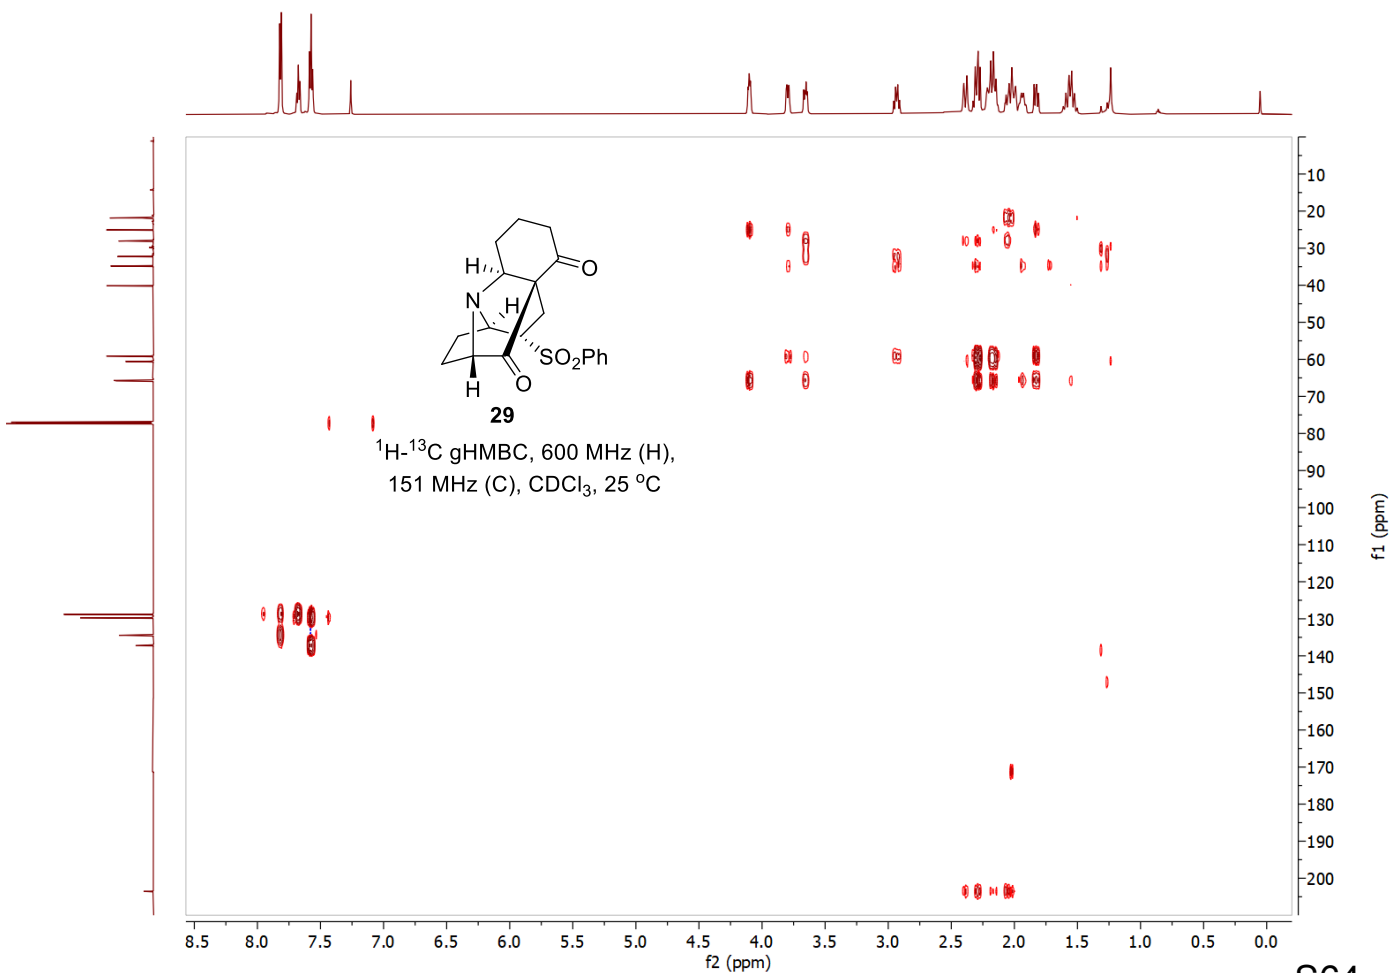

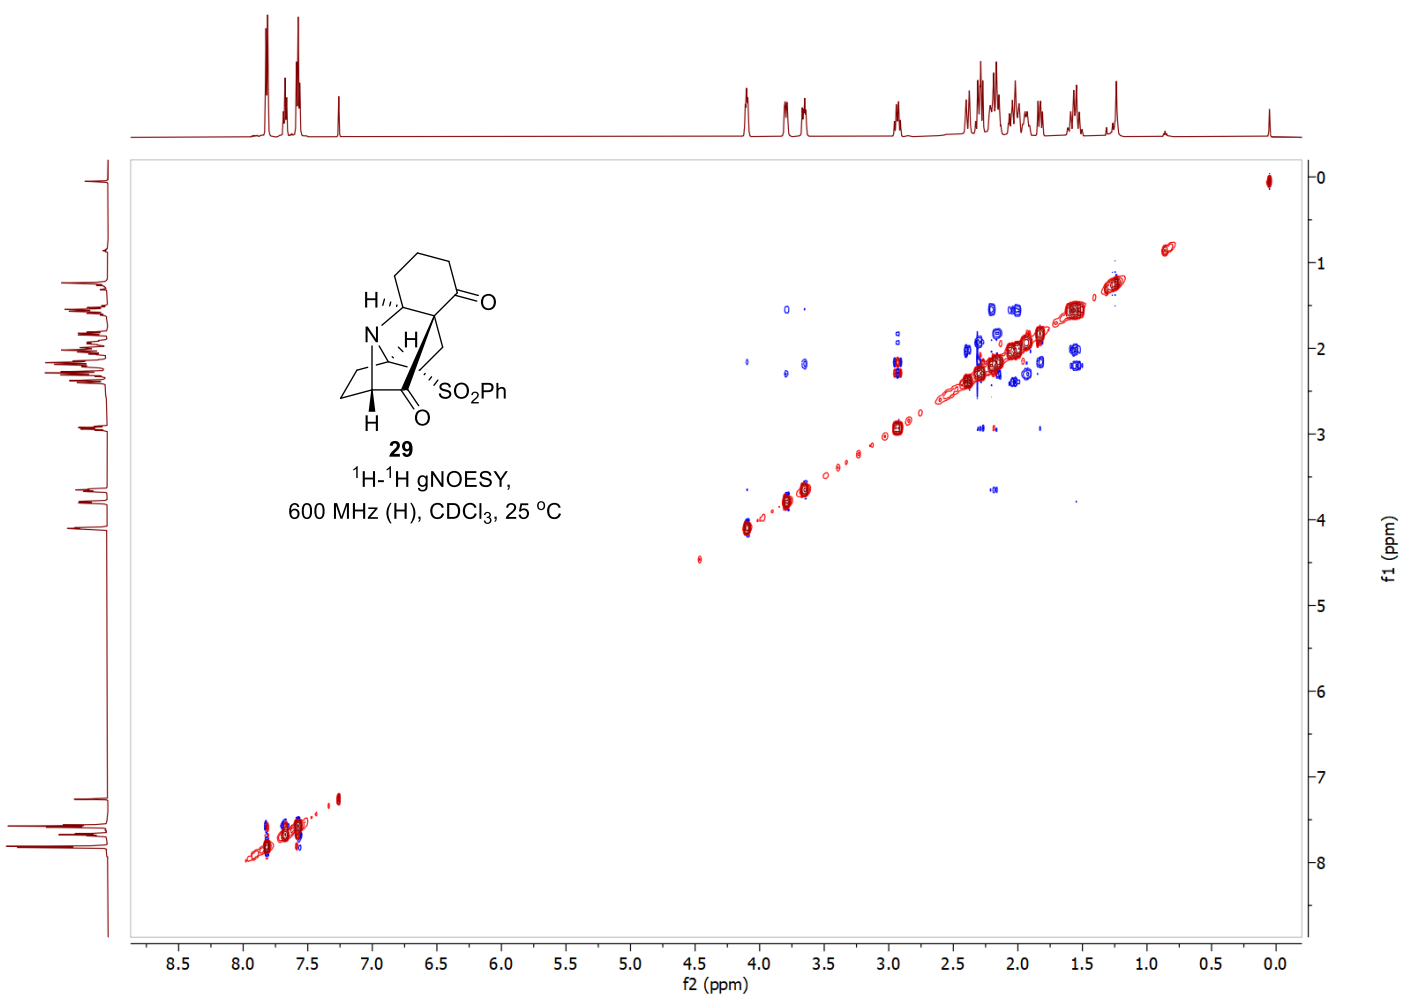

Supplement: d6ob00837b1.pdf [file d6ob00837b1.pdf]
